# Supplementary material for: Evidence for a kinetic FLP reaction pathway in the activation of benzyl chlorides by alkali metal–phosphine pairs
Source: Royal Society of Chemistry journal article supplement (doi:10.1039/d4dt02028f), 2024-01-01
Supplement: d4dt02028f1.pdf [file d4dt02028f1.pdf]

## Supporting Information

# Evidence for a kinetic FLP reaction pathway in the activation of benzyl chlorides by alkali metal-phosphine pairs

Daniel Csokas,<sup>a</sup> Max Coles,<sup>b</sup> Toh Zhi Hao<sup>c</sup> and Rowan D. Young<sup>b\*</sup>

<sup>a</sup> Institute of Organic Chemistry, HUN-REN Research Centre for Natural Sciences, H-1117 Budapest, Hungary

<sup>b</sup> School of Chemistry and Molecular Biosciences, University of Queensland, 68 Cooper Road, Australia 4067

<sup>c</sup> Department of Chemistry, National University of Singapore, 3 Science Drive 3, Singapore 117543

*\*Corresponding Author*

## Table of Contents

|                                                                                                                          |           |
|--------------------------------------------------------------------------------------------------------------------------|-----------|
| <b>Experimental .....</b>                                                                                                | <b>2</b>  |
| General information.....                                                                                                 | 2         |
| Order in PPh <sub>3</sub> .....                                                                                          | 3         |
| Order in Na[BAR <sup>F</sup> <sub>20</sub> ].....                                                                        | 4         |
| Hammett plot analysis.....                                                                                               | 5         |
| Activation barrier for reaction between PPh <sub>3</sub> and BnCl with Na[BAR <sup>F</sup> <sub>20</sub> ] additive..... | 6         |
| Rates of reaction with different phosphines .....                                                                        | 8         |
| Addition of Na[BAR <sup>F</sup> <sub>20</sub> ] to PPh <sub>3</sub> .....                                                | 10        |
| <b>Computational Studies .....</b>                                                                                       | <b>12</b> |
| Computational methodology .....                                                                                          | 12        |
| Computational results .....                                                                                              | 13        |
| <b>References .....</b>                                                                                                  | <b>67</b> |

## Experimental

### General information

Experiments were performed under inert conditions using standard Schlenk techniques or a glove box (Vacuum Atmospheres Company) as appropriate. Subsequent manipulation of air-stable products was carried out under ambient conditions. Dichloromethane (DCM), acetonitrile, diethylether and *n*-hexane were purified using a solvent purification system, deoxygenated and stored over 4 Å molecular sieves prior to use. Chloroform-*d* (CDCl<sub>3</sub>), 1,2-dichlorobenzene (DCB), *tert*-butylmethylether (TBME), dimethylformamide (DMF) and 1,2-difluorobenzene (DFB) solvents were stirred over CaH<sub>2</sub> at room temperature under nitrogen atmosphere overnight prior to distillation under reduced pressure. Tetrahydrofuran (THF) was distilled under nitrogen from sodium and benzophenone and stored over 4 Å molecular sieves. Glassware for reactions were oven-dried overnight prior to use in experiments. Column chromatography using silica (230-400 mesh) was carried out using analytical grade eluent mixtures of *n*-hexane and ethyl acetate. <sup>1</sup>H, <sup>13</sup>C, <sup>19</sup>F and <sup>31</sup>P NMR spectra were all carried out at 298 K and recorded using Bruker AV-400 and AV-500 spectrometers. The chemical shifts (δ) for <sup>1</sup>H and <sup>31</sup>P{<sup>1</sup>H} spectra were referenced to solvent, bis(triphenylphosphine)iminium tetrakis(pentafluorophenyl)borate {[PPN][BAR<sup>F</sup><sub>20</sub>]} or hexamethylphosphoramide (HMPA). The starting materials Na[B(C<sub>6</sub>F<sub>5</sub>)<sub>4</sub>]<sup>1</sup> and K[B(C<sub>6</sub>F<sub>5</sub>)<sub>4</sub>]<sup>2</sup> were prepared using reported methods. All other reagents were obtained commercially and used as received.

## Order in PPh<sub>3</sub>

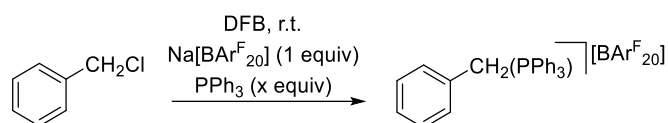

$\text{Na}[\text{BAr}^{\text{F}}_{20}]$  (35.0 mg, 1.0 equiv, 0.05 mmol) and  $\text{PPh}_3$  (0.25, 0.5, 1.0 equiv) were dissolved in DFB (0.5 mL). The solution was added to a J. Young's NMR tube containing  $\text{BnCl}$  (6.2 mg, 1.0 equiv, 0.05 mmol) and  $[\text{PPN}][\text{BAr}^{\text{F}}_{20}]$  (30.3 mg, 0.025 mmol) as an internal standard. The reaction was monitored at 298 K by  $^{31}\text{P}$  NMR spectroscopy to determine the concentration of the product  $[\text{BnPPH}_3][\text{BAr}^{\text{F}}_{20}]$  and the remaining starting material.

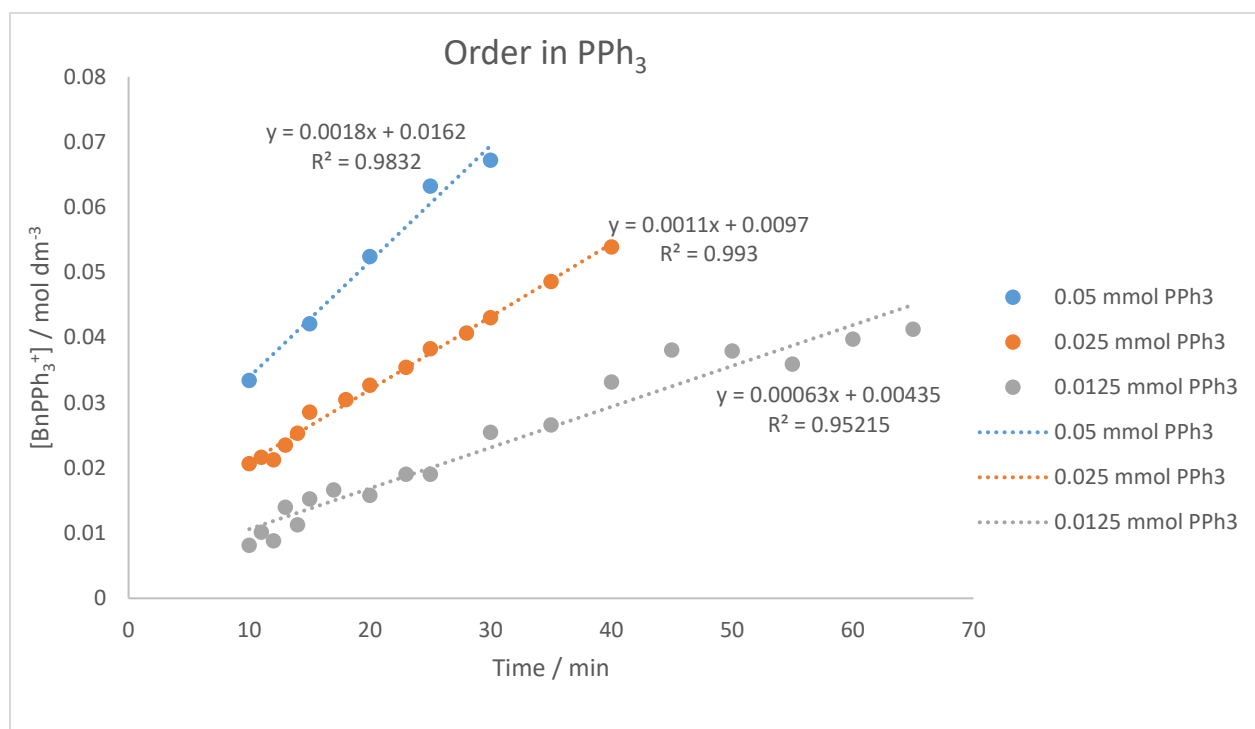

Figure S1. Initial rates plot of time versus concentration of  $\text{PPh}_3$  for determination of order in  $\text{PPh}_3$

| $\text{PPh}_3$ eq. | $k_{\text{obs}}$     |
|--------------------|----------------------|
| 0.25               | $6.3 \times 10^{-4}$ |
| 0.5                | $1.1 \times 10^{-3}$ |
| 1.0                | $1.8 \times 10^{-3}$ |

## Order in Na[BAr<sup>F</sup><sub>20</sub>]

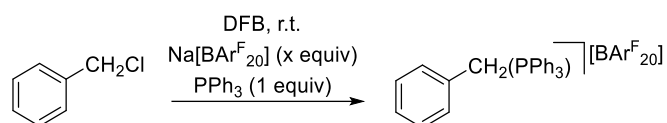

PPh<sub>3</sub> (13.0 mg, 1.0 equiv, 0.05 mmol) and Na[BAr<sup>F</sup><sub>20</sub>] (0.25, 0.5, 1.0 equiv) were dissolved in DFB (0.5 mL). The solution was added to a J. Young's NMR tube containing BnCl (6.2 mg, 1.0 equiv, 0.05 mmol) and [PPN][BAr<sup>F</sup><sub>20</sub>] (30.3 mg, 0.025 mmol) as an internal standard. The reaction was monitored at 298 K by <sup>31</sup>P NMR spectroscopy to determine the concentration of the product [BnPPH<sub>3</sub>][BAr<sup>F</sup><sub>20</sub>] and the remaining starting material.

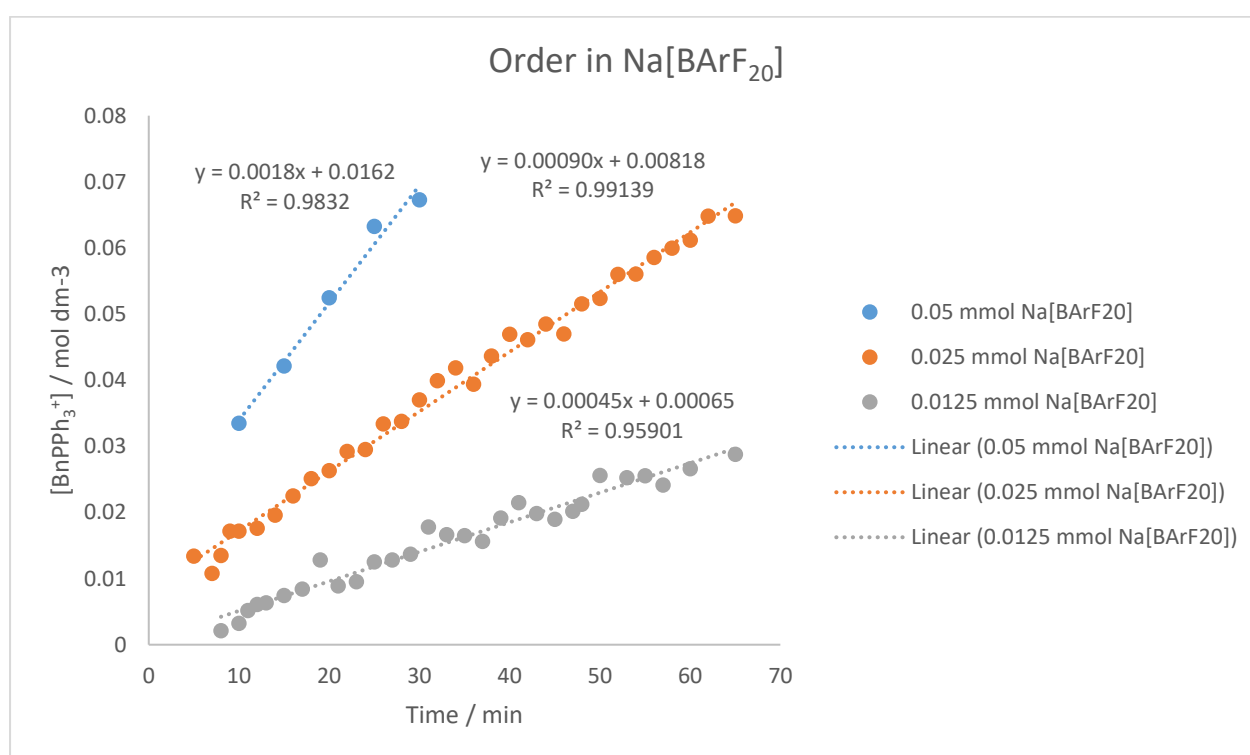

Figure S2. Initial rates plot of time versus concentration of Na[BAr<sup>F</sup><sub>20</sub>] for determination of order in Na[BAr<sup>F</sup><sub>20</sub>]

| Eq. Na[BAr <sup>F</sup> <sub>20</sub> ] | k <sub>obs</sub>     |
|-----------------------------------------|----------------------|
| 0.25                                    | 4.5x10 <sup>-4</sup> |
| 0.5                                     | 9.0x10 <sup>-4</sup> |
| 1.0                                     | 1.8x10 <sup>-3</sup> |

## Hammett plot analysis

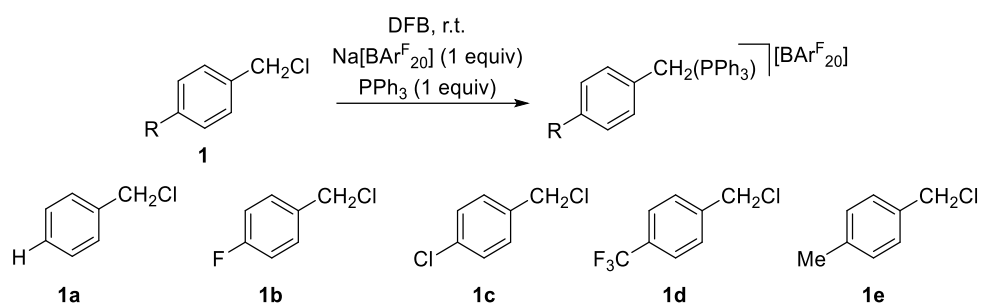

PPh<sub>3</sub> (13.0 mg, 1.0 equiv, 0.05 mmol) and Na[BAr<sup>F</sup><sub>20</sub>] (35.0 mg, 1.0 equiv, 0.05 mmol) were dissolved in DFB (0.5 mL). The solution was added to a J. Young's NMR tube containing a combinations of compounds **1a**, **1b**, **1c**, **1d** and **1e** such that the combined concentration of compounds **1** was equal to 1.0 equiv. The reaction was monitored at 298 K by <sup>1</sup>H and <sup>31</sup>P NMR spectroscopies to determine the ratio of the products (and thus their relative rate values).

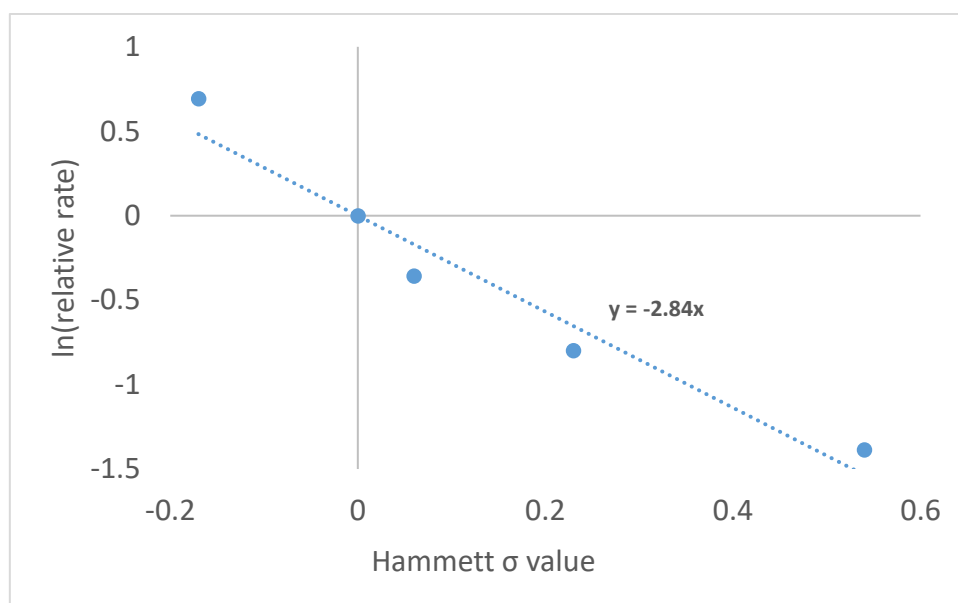

Figure S3. Plot of natural logarithmic of rate versus Hammett  $\sigma$ -values (i.e. Hammett plot analysis) for reaction of PPh<sub>3</sub> and Na[BAr<sup>F</sup><sub>20</sub>] with various benzyl chlorides.  $\rho = -2.84 \pm 0.37$ .

### Activation barrier for reaction between PPh<sub>3</sub> and BnCl with Na[BAr<sup>F</sup><sub>20</sub>] additive

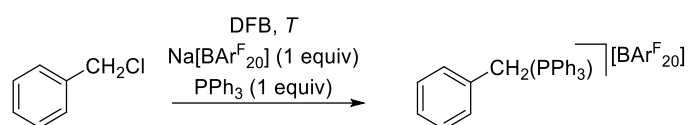

PPh<sub>3</sub> (13.0 mg, 1.0 equiv, 0.05 mmol) and Na[BAr<sup>F</sup><sub>20</sub>] (35.0 mg, 1.0 equiv, 0.05 mmol) were dissolved in DFB (0.5 mL). The solution was added to a J. Young's NMR tube containing BnCl (6.2 mg, 1.0 equiv, 0.05 mmol). A sealed capillary containing neat hexamethylphosphoramide was added for an internal standard. The reaction was monitored at 298 K, 303 K, 308 K, 313 K or 318 K by <sup>31</sup>P NMR spectroscopy to determine the concentration of the product and the remaining starting material (PPh<sub>3</sub>).

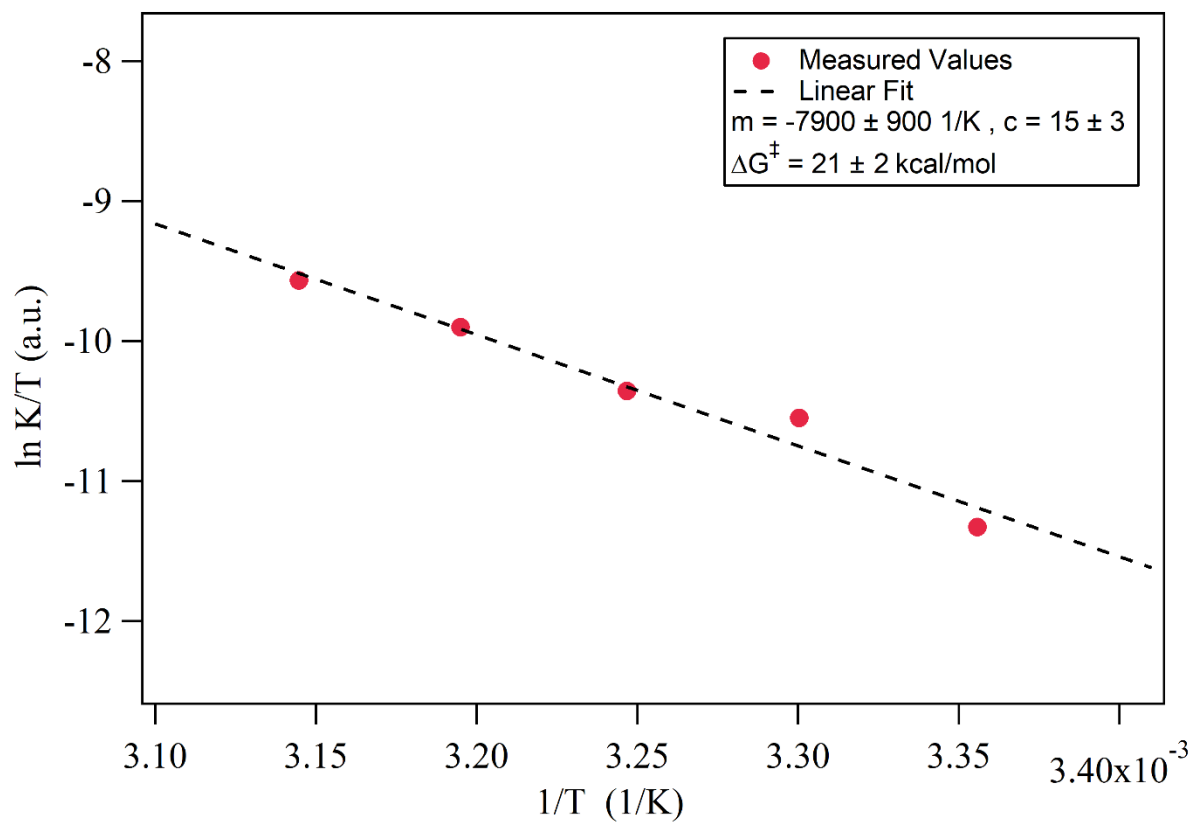

Figure S4. Eyring plot for reaction between  $\text{PPh}_3$ ,  $\text{Na}[\text{BAr}^{\text{F}}_{20}]$  and  $\text{BnCl}$  at 298 K, 303 K, 308 K, 313 K and 318 K.

Activation parameters:  $\Delta H^\ddagger = 15.6 \text{ kcal mol}^{-1}$ ,  $\Delta S^\ddagger = -0.017 \text{ kcal mol}^{-1} \text{ K}^{-1}$ ,  $\Delta G^\ddagger = 20.7 \pm 2.0 \text{ kcal mol}^{-1}$

## Rates of reaction with different phosphines

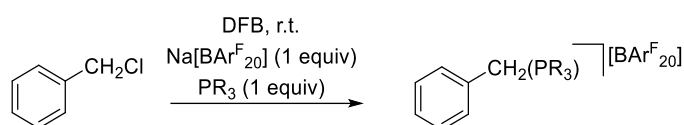

PR<sub>3</sub> attempted:

PPh<sub>3</sub> PPh<sub>2</sub>Me P(4-CF<sub>3</sub>-C<sub>6</sub>H<sub>4</sub>)<sub>3</sub> PPh<sub>2</sub>(All) PCy<sub>3</sub> P(1-Np)<sub>3</sub>

PPh<sub>2</sub>Cy PPhCy<sub>2</sub> P(4-Anis)<sub>3</sub> PPh<sub>2</sub>(2-BrC<sub>6</sub>H<sub>4</sub>) P(4-Tol)<sub>3</sub>

PR<sub>3</sub> (1.0 equiv, 0.05 mmol) and Na[BAR<sup>F</sup><sub>20</sub>] (35.0 mg, 1.0 equiv, 0.05 mmol) were dissolved in DFB (0.5 mL). The solution was added to a J. Young's NMR tube containing BnCl (6.2 mg, 1.0 equiv, 0.05 mmol) and [PPN][BAR<sup>F</sup><sub>20</sub>] (30.3 mg, 0.025 mmol) as an internal standard. The reaction was monitored via <sup>31</sup>P NMR spectroscopy for the first 60 minutes of reaction (or thereabouts). The reaction with phosphine P(4-CF<sub>3</sub>-C<sub>6</sub>H<sub>4</sub>)<sub>3</sub> was monitored for 10 days, after which a yield of 17% was observed, giving a rate 590 times less than PPh<sub>3</sub>.

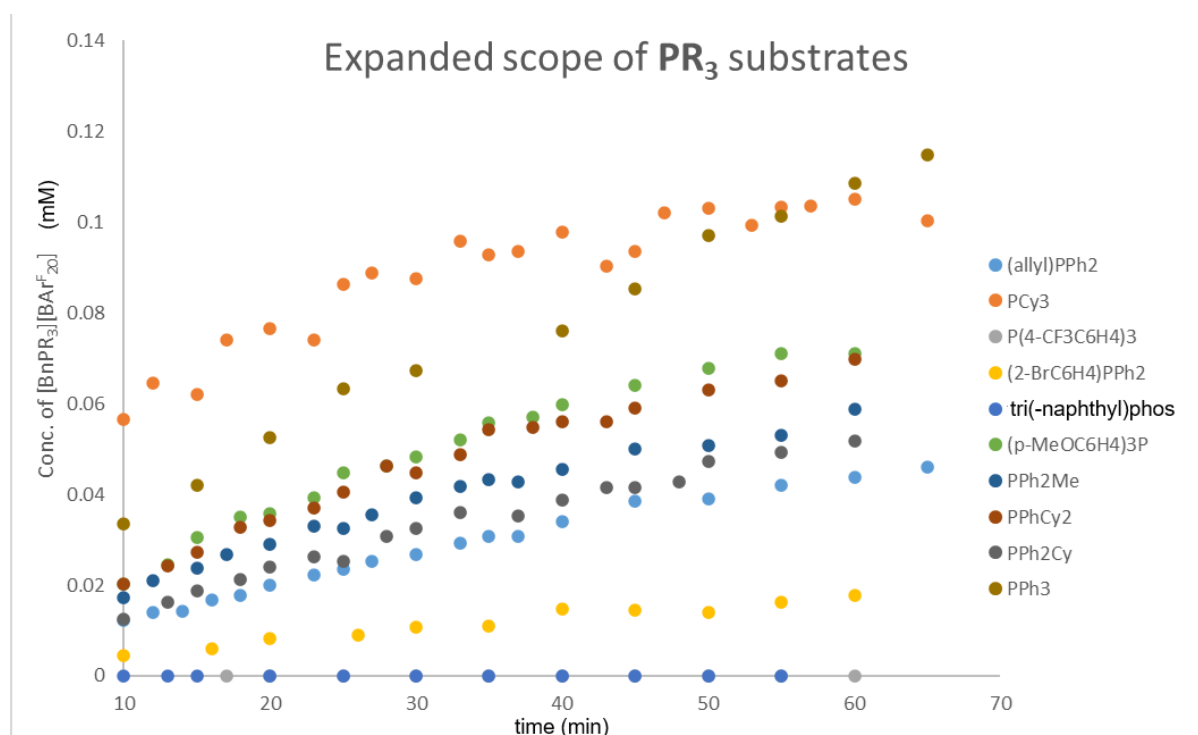

Figure S5. Plot of product concentration versus time for the reaction of various phosphines (PR<sub>3</sub>) with BnCl and Na[BAR<sup>F</sup><sub>20</sub>] at room temperature.



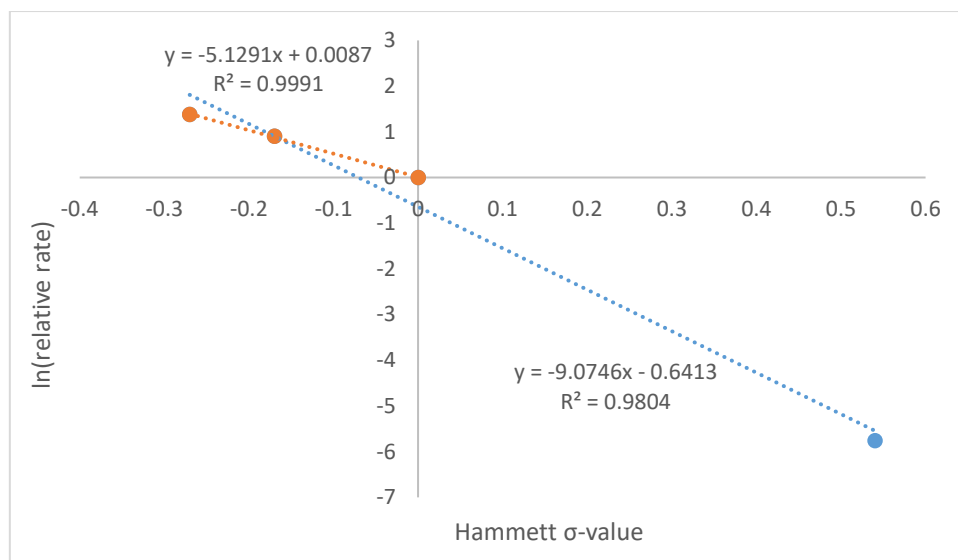

Figure S6. Plot of natural logarithm of relative reaction rates vs Hammett  $\sigma$ -values for aryl substituents of homoleptic triarylphosphines ( $\text{PAr}_3$ ).

## Addition of Na[BAr<sup>F</sup><sub>20</sub>] to PPh<sub>3</sub>

### <sup>31</sup>P NMR signal evidence for LP ground state

A sample of PPh<sub>3</sub> (13.1 mg, 0.05 mmol) was dissolved in 1 mL DFB. [PPN][BAr<sup>F</sup><sub>20</sub>] (7.2 mg, 0.006 mmol) was added as an internal reference and the sample analysed by <sup>31</sup>P NMR spectroscopy. Na[BAr<sup>F</sup><sub>20</sub>] (35.8 mg, 0.05 mmol) was added and the sample analysed again with <sup>31</sup>P NMR spectroscopy.

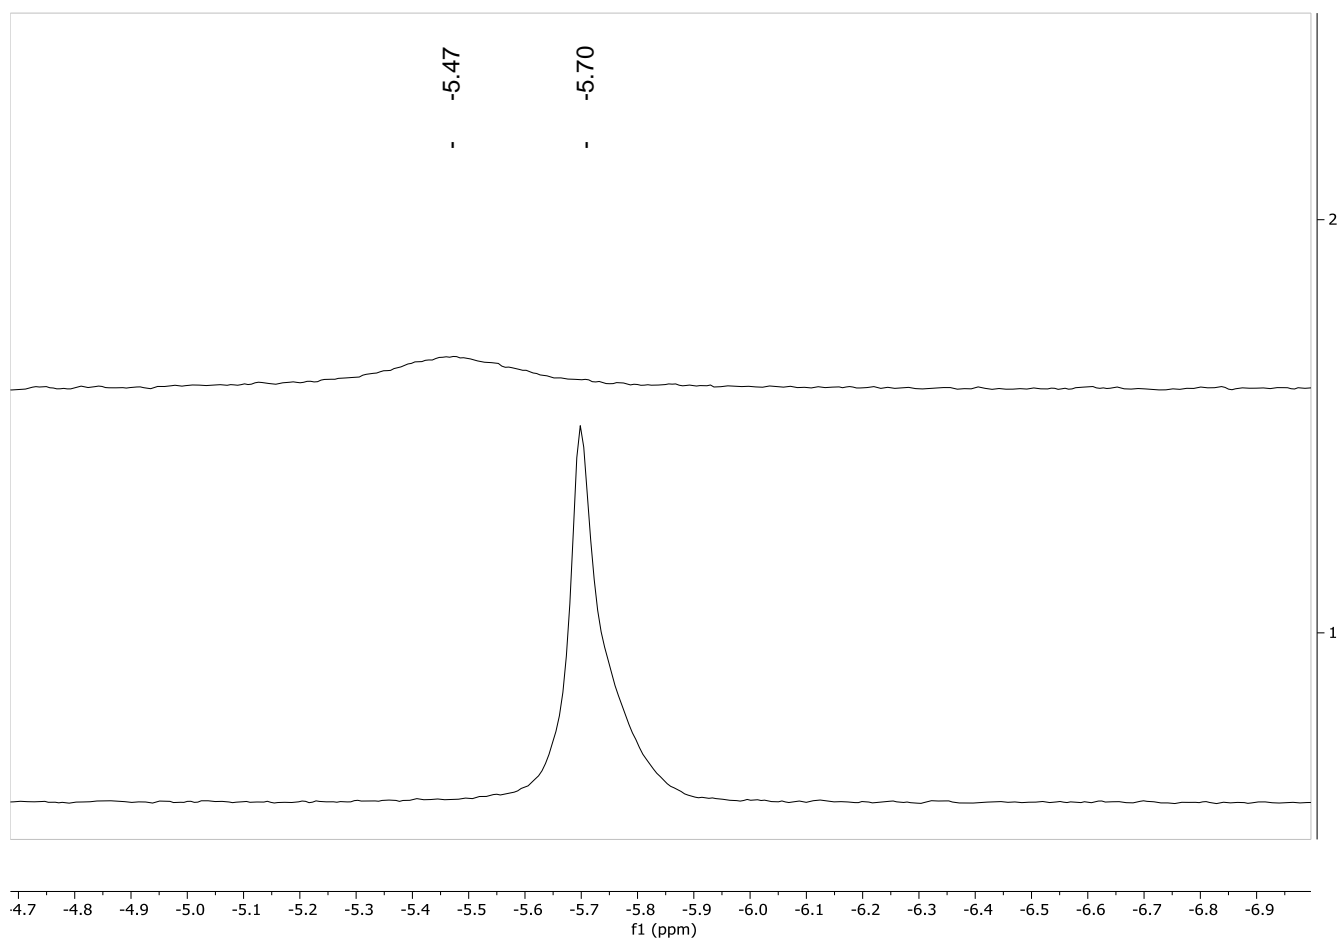

Figure S7. <sup>31</sup>P NMR spectra of samples of PPh<sub>3</sub> (bottom) and Na[BAr<sup>F</sup><sub>20</sub>] + PPh<sub>3</sub> in DFB relative to [PPN][BAr<sup>F</sup><sub>20</sub>] internal standard.

### DOSY evidence for LP ground state

A sample of PPh<sub>3</sub> (13.0 mg, 1.0 equiv, 0.05 mmol) was dissolved in 0.65 mL DFB and 0.1 mL toluene-*d*<sub>8</sub>. The sample was analysed by <sup>1</sup>H DOSY NMR. Na[BAR<sup>F</sup><sub>20</sub>] (35.0 mg, 1.0 equiv, 0.05 mmol) was then added and the sample reanalysed by <sup>1</sup>H DOSY NMR.

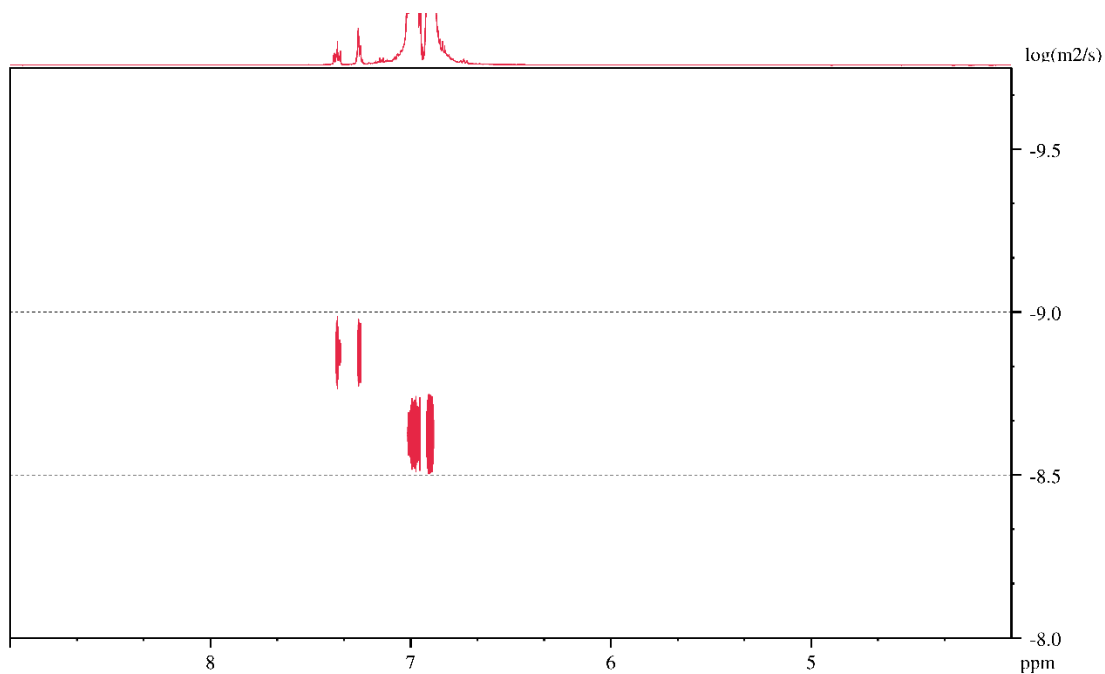

Figure S8. <sup>1</sup>H DOSY NMR spectrum of PPh<sub>3</sub>. Diffusion rate =  $9.18 \times 10^{-10} \text{ m}^2 \text{ s}^{-1}$ .

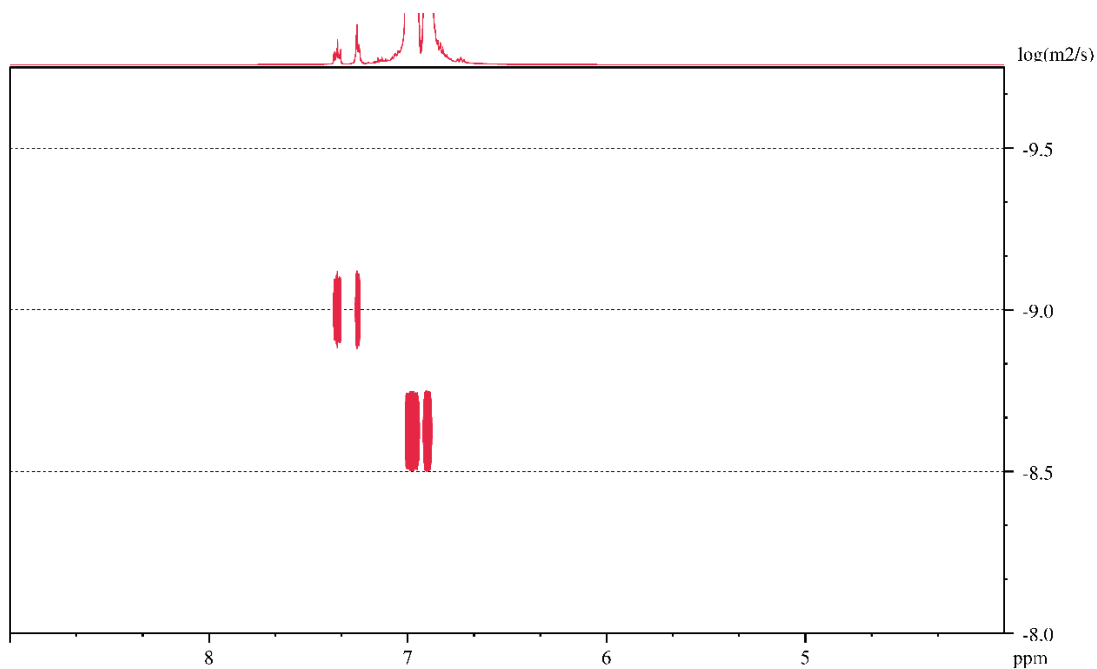

Figure S9. <sup>1</sup>H DOSY NMR spectrum of PPh<sub>3</sub>/Na[BAR<sup>F</sup><sub>20</sub>]. Diffusion rate =  $8.43 \times 10^{-10} \text{ m}^2 \text{ s}^{-1}$ .

## Computational Studies

### Computational methodology

To gain insight into the mechanism of formation of the heterocyclic compounds, we performed DFT calculations with the Gaussian 16 suite of programs (Revision A.03).<sup>3</sup>

The calculations were performed using the range-separated hybrid dispersion-corrected  $\omega$ B97X-D exchange-correlation functional.<sup>4</sup> The solvation effects were taken into account by computing the solvation free energies employing the SMD implicit solvation model (solvent: Dichloromethane  $\rightarrow \epsilon = 8.93$ ).<sup>5</sup> Geometry optimisations and transition state locations were performed in solution phase utilizing the SMD model. All the converged geometries were analysed by vibrational frequency calculations to identify the nature of the obtained structures. The vibrational analysis revealed that all located transition states possess only one negative Hessian eigenvalue, while no imaginary frequencies were obtained for the reported minima.

The formula used to calculate the free energy:  $G = E_0' + (G_0(\text{DCM}) - E_0(\text{DCM})) + \Delta G_{\text{conc}}$ . The reported Gibbs free energies were obtained by combining  $\omega$ B97X-D/Def2TZVPP electronic energies ( $E_0'$ ) with the thermal and entropic contributions computed at the  $\omega$ B97X-D/Def2SVP level at  $T = 298.15$  K ( $G_0 - E_0$ ).<sup>6</sup> The  $G_{\text{sol}}(\text{DCM})$  is the solution-phase Gibbs free energy, which was derived from a single point energy calculation at the  $\omega$ B97X-D/Def2SVP level for the geometry optimized in solution phase by employing the SMD model. The value of  $\Delta G_{\text{conc}}$  (0.0030119 Hartree at 298.15 K  $\approx 1.89$  kcal/mol) corresponds to concentration correction to the Gibbs free energy when shifting from ideal gas standard state ( $p = 1$  atm) to the standard concentration in solution phase ( $c = 1$  mol/dm<sup>3</sup>). The conformational analysis was carried out in the MacroModel software (Release 2017-1).<sup>7</sup>

## Computational results

### Cl anion removal

The thermodynamics of the pathway involving the formation of benzylic carbocation was also considered (Figure S10). The free energy change associated with the C-Cl bond cleavage in the benzyl chloride was computed to be 183.1 kcal/mol, hence, the spontaneous Cl<sup>-</sup> anion dissociation is highly unlikely under the applied conditions.

The DFT computations estimated that the reaction, resulting in NaCl and the complex wherein the benzylic carbocation is positioned in close proximity of the [BAr<sup>F</sup><sub>20</sub>]<sup>-</sup> anion, was thermodynamically still rather unfavorable ( $\Delta G = 30.6$  kcal/mol). The respective transition state is expected to lie higher than the product side. Therefore, the Na[BAr<sup>F</sup><sub>20</sub>]-assisted C-Cl bond cleavage can be excluded as well.

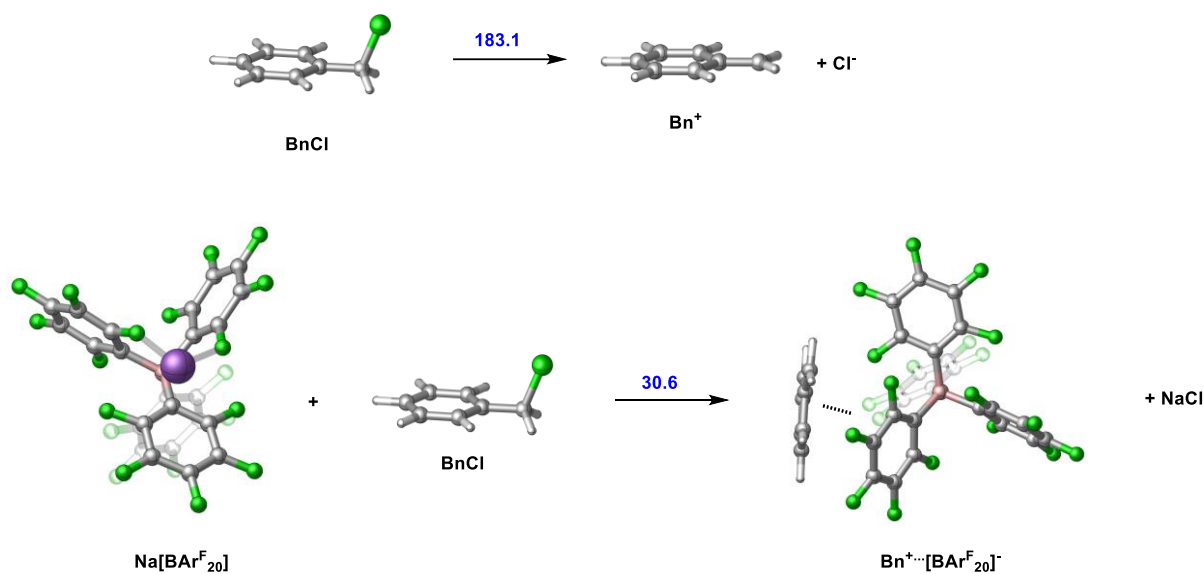

Figure S10. Gibbs energy changes associated with the removal of Cl anion.

## Transition states of C-Cl cleavage

Guided by the computational results above, we assessed a pathway in which PPh<sub>3</sub> is involved in the C-Cl bond-breaking step as a nucleophile. At the outset, we chose the monomeric state of the Na[BAR<sup>F</sup><sub>20</sub>], as a possible reference state in our calculations. The barrier for C-Cl cleavage was calculated by computing the free energy difference between the respective TS and the Na[BAR<sup>F</sup><sub>20</sub>] reference state. Considering the large conformational space, an extensive conformational search was performed for the transition states, and some representative examples are shown in Figure S11. These TSs correspond to the formation of the loosely bound complex [Bn-PPh<sub>3</sub>]<sup>+</sup>⋯NaCl⋯[BAR<sup>F</sup><sub>20</sub>]<sup>-</sup>. The lowest barrier related to C-Cl activation is estimated to be 21.9 kcal/mol with respect to the separate state Na[BAR<sup>F</sup><sub>20</sub>]<sup>-</sup> + PPh<sub>3</sub> + BnCl, which points to a kinetically feasible C-Cl activation.

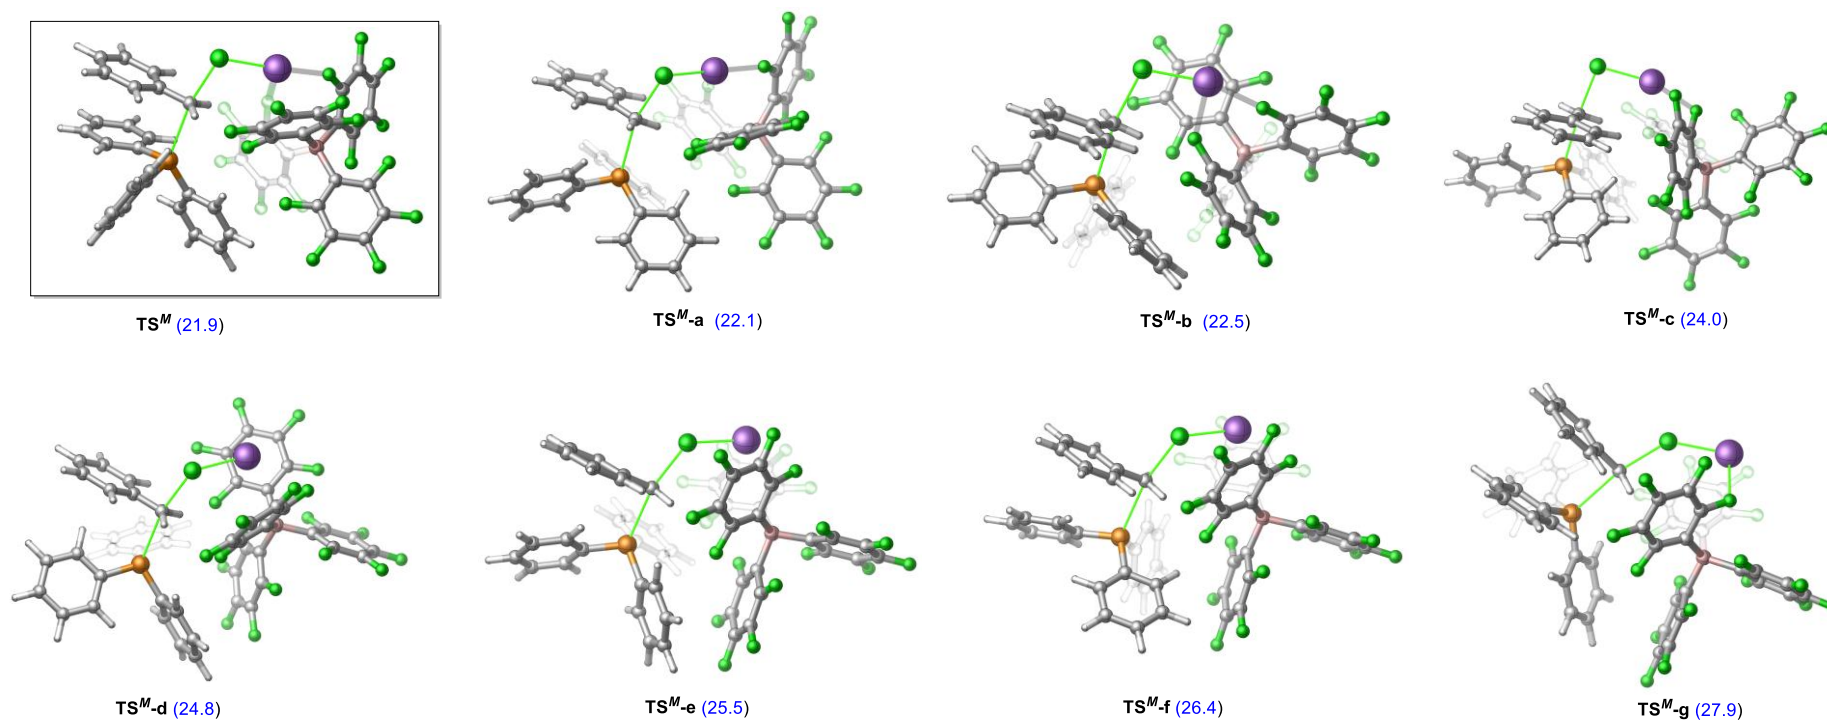

Figure S11. DFT-optimized conformers of **TS<sup>M</sup>** transition state. Relative stabilities are given in parenthesis (in kcal/mol) with respect to separate state **Na[BAR<sup>F</sup><sub>20</sub>]<sup>-</sup> + PPh<sub>3</sub> + BnCl**.

## Dimerization of Na[BAR<sup>F</sup><sub>20</sub>]

Based on our previous experience, we examined the possibility of a dimeric form of the Na[BAR<sup>F</sup><sub>20</sub>] species. In the dimer Na[BAR<sup>F</sup><sub>20</sub>]···Na[BAR<sup>F</sup><sub>20</sub>], one of the Na<sup>+</sup> ions connects the two BAR<sup>F</sup><sub>20</sub>-fragments, which may be retained in the solution to some extent. Various conformers were identified, shown in Figure S12 along with free energy change associated with the dimerization. The computed data suggest that the dimerization is slightly exergonic (-2.4 kcal/mol), and the existence of the dimeric form cannot be excluded.

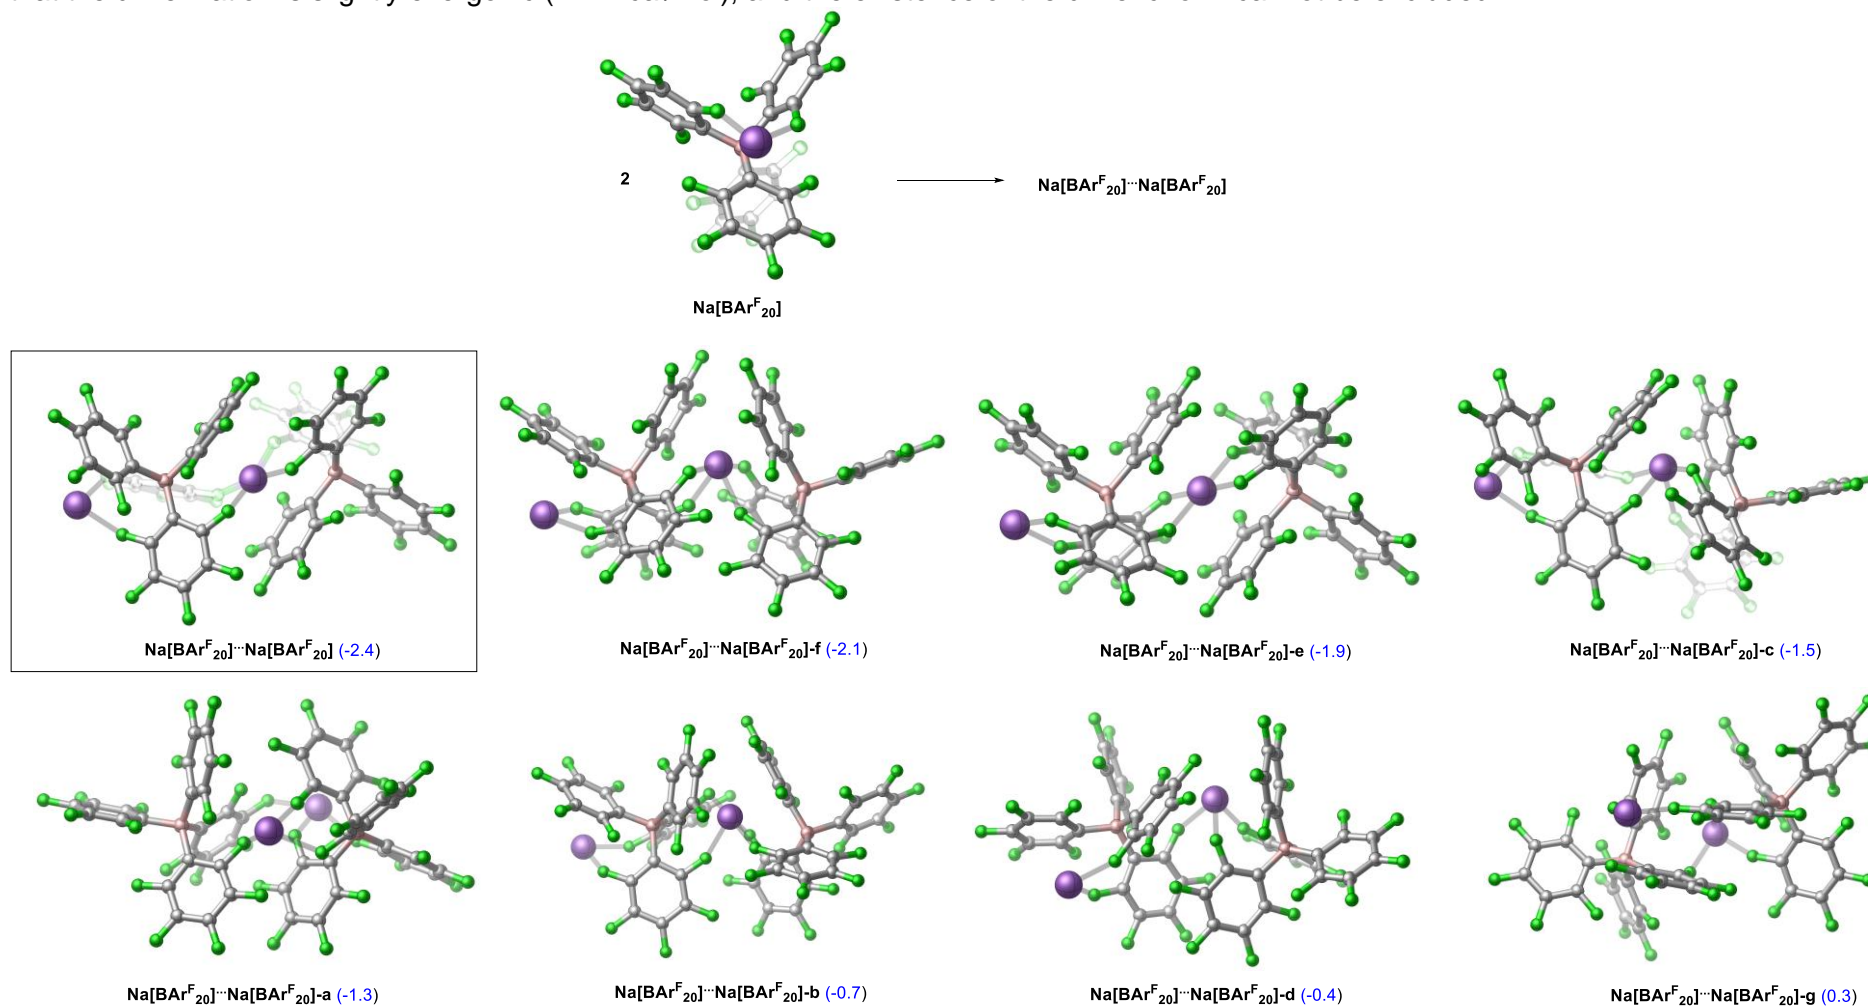

Figure 12. Gibbs energy changes associated with the dimerization of Na[BAR<sup>F</sup><sub>20</sub>] species are given in parenthesis (in kcal/mol).

## PPh<sub>3</sub> coordination to Na[BAr<sup>F</sup><sub>20</sub>]

Next, DFT calculations were carried out to estimate the relative stability of the complex PPh<sub>3</sub>⋯Na[BAr<sup>F</sup><sub>20</sub>] in the solution phase. The coordination was predicted to be favored by 1.8 kcal/mol (Figure S13), thus, for the monomeric pathway, the PPh<sub>3</sub>⋯Na[BAr<sup>F</sup><sub>20</sub>] complex was used as the reference state (see Figure 4B in the main text).

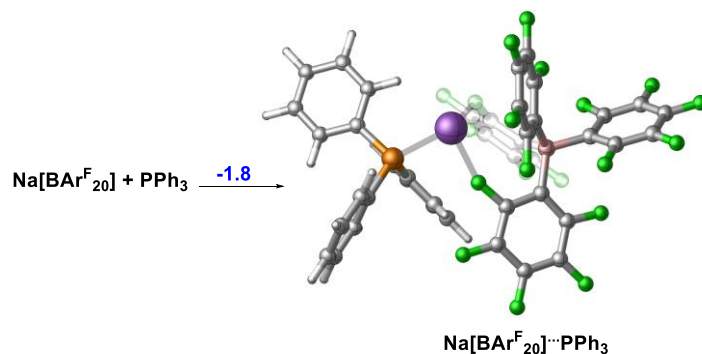

Figure S13. Gibbs energy change associated with the PPh<sub>3</sub> coordination to Na[BAr<sup>F</sup><sub>20</sub>].

Similarly to the monomeric state, the thermodynamics of the PPh<sub>3</sub>⋯Na[BAr<sup>F</sup><sub>20</sub>]⋯Na[BAr<sup>F</sup><sub>20</sub>] formation was computed (Figure S14). The formation of the adduct is only slightly exergonic (-0.8 kcal/mol), yet, this state was used as a reference state to estimate the overall reaction barrier on the dimeric pathway (see Figure 4C in the main text).

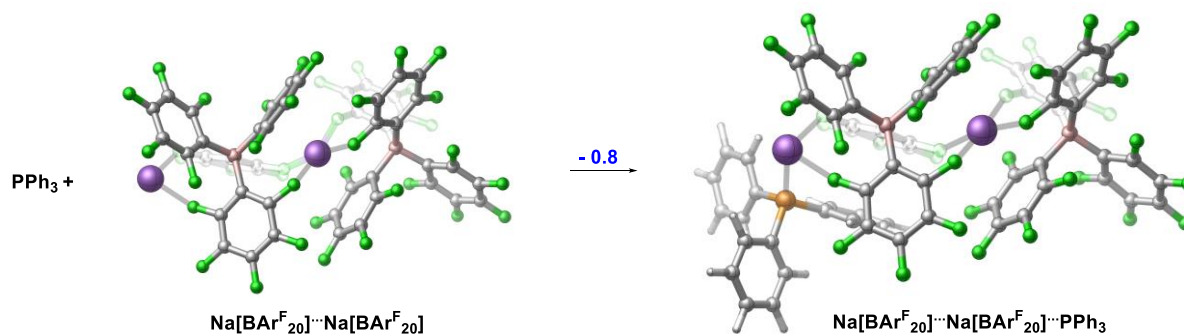

Figure 14. Gibbs energy change associated with the PPh<sub>3</sub> coordination to Na[BAr<sup>F</sup><sub>20</sub>]⋯Na[BAr<sup>F</sup><sub>20</sub>].



## C-Cl activation without Na<sup>+</sup> assistance

For Na<sup>+</sup>-free reaction path, the activation barrier corresponding to the nucleophilic substitution of the chloride by the PPh<sub>3</sub> is computed to be 29.2 kcal/mol with respect to the reference state PPh<sub>3</sub>⋯Na[BAr<sup>F</sup><sub>20</sub>] + BnCl (Figure S15). From a kinetic standpoint, this pathway is not competitive as the overall barrier height is about 6 kcal/mol higher than that of the Na[BAr<sup>F</sup><sub>20</sub>]-assisted reaction.

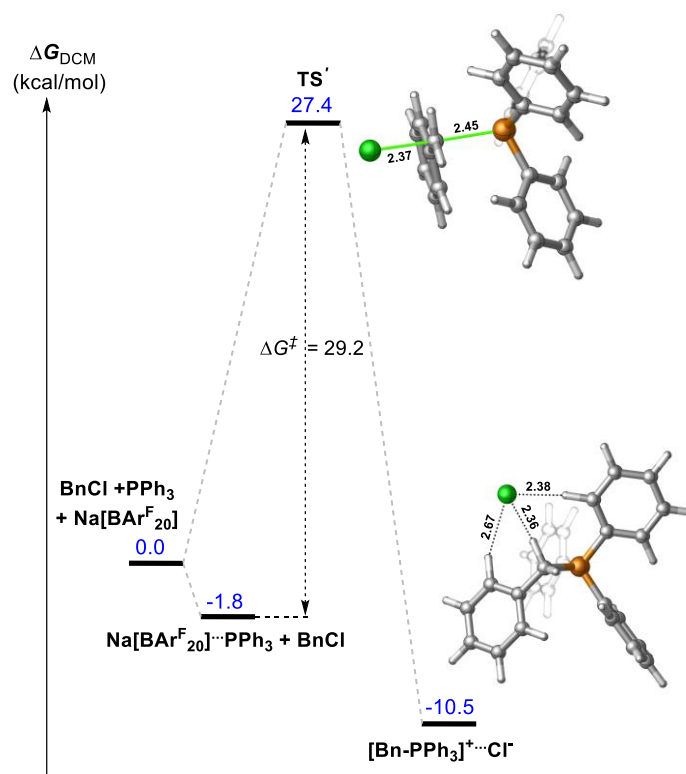

Figure 15. Gibbs energy change associated with the reaction between **BnCl** and **PPh<sub>3</sub>** relative to a ground state with a monomeric Na[BAr<sup>F</sup><sub>20</sub>]<sup>-</sup>⋯PPh<sub>3</sub> adduct.

## Computed energy components of the reported structures.

Table S1. Summary of energy data (given in Hartree) computed for optimized structures at the  $\omega$ B97X-D/Def2SVP level of theory. Note that **G** contains concentration correction. For the definition of various energy components, see Computational details section (above).

| Structure                                                                                                                       | $E_0'$     | $G_0(\text{DCM})$ | $E_0(\text{DCM})$ | $G$        |
|---------------------------------------------------------------------------------------------------------------------------------|------------|-------------------|-------------------|------------|
| BnCl                                                                                                                            | -731.1916  | -730.6549         | -730.7430         | -731.1005  |
| Bn <sup>+</sup>                                                                                                                 | -270.7385  | -270.3598         | -270.4487         | -270.6466  |
| Cl <sup>-</sup>                                                                                                                 | -460.1494  | -460.0069         | -459.9912         | -460.1620  |
| Na[BAr <sup>F</sup> <sub>20</sub> ]                                                                                             | -3098.8349 | -3095.2176        | -3095.3528        | -3098.6968 |
| Bn <sup>+</sup> ...[BAr <sup>F</sup> <sub>20</sub> ] <sup>-</sup>                                                               | -3207.3799 | -3203.4194        | -3203.6667        | -3207.1296 |
| NaCl                                                                                                                            | -622.6001  | -622.3980         | -622.3762         | -622.6189  |
| PPh <sub>3</sub>                                                                                                                | -1036.3385 | -1035.2582        | -1035.4881        | -1036.1056 |
| Na[BAr <sup>F</sup> <sub>20</sub> ] <sup>-</sup> ...PPh <sub>3</sub>                                                            | -4135.1998 | -4130.4845        | -4130.8761        | -4134.8052 |
| Na[BAr <sup>F</sup> <sub>20</sub> ] <sup>-</sup> ...Na[BAr <sup>F</sup> <sub>20</sub> ] <sup>-</sup> ...PPh <sub>3</sub>        | -7234.0649 | -7225.7232        | -7226.2808        | -7233.5042 |
| Na[BAr <sup>F</sup> <sub>20</sub> ] <sup>-</sup> ...Na[BAr <sup>F</sup> <sub>20</sub> ]                                         | -6197.6985 | -6190.4567        | -6190.7548        | -6197.3974 |
| Na[BAr <sup>F</sup> <sub>20</sub> ] <sup>-</sup> ...Na[BAr <sup>F</sup> <sub>20</sub> ]-a                                       | -6197.6977 | -6190.4579        | -6190.7569        | -6197.3956 |
| Na[BAr <sup>F</sup> <sub>20</sub> ] <sup>-</sup> ...Na[BAr <sup>F</sup> <sub>20</sub> ]-b                                       | -6197.6979 | -6190.4535        | -6190.7537        | -6197.3947 |
| Na[BAr <sup>F</sup> <sub>20</sub> ] <sup>-</sup> ...Na[BAr <sup>F</sup> <sub>20</sub> ]-c                                       | -6197.6987 | -6190.4541        | -6190.7538        | -6197.3959 |
| Na[BAr <sup>F</sup> <sub>20</sub> ] <sup>-</sup> ...Na[BAr <sup>F</sup> <sub>20</sub> ]-d                                       | -6197.6951 | -6190.4535        | -6190.7514        | -6197.3942 |
| Na[BAr <sup>F</sup> <sub>20</sub> ] <sup>-</sup> ...Na[BAr <sup>F</sup> <sub>20</sub> ]-e                                       | -6197.6958 | -6190.4543        | -6190.7504        | -6197.3966 |
| Na[BAr <sup>F</sup> <sub>20</sub> ] <sup>-</sup> ...Na[BAr <sup>F</sup> <sub>20</sub> ]-f                                       | -6197.6996 | -6190.4554        | -6190.7550        | -6197.3970 |
| Na[BAr <sup>F</sup> <sub>20</sub> ] <sup>-</sup> ...Na[BAr <sup>F</sup> <sub>20</sub> ]-g                                       | -6197.6945 | -6190.4550        | -6190.7535        | -6197.3930 |
| TS <sup>I</sup>                                                                                                                 | -1767.5057 | -1765.8608        | -1766.2010        | -1767.1624 |
| [Bn-PPh <sub>3</sub> ] <sup>+</sup> ...Cl <sup>-</sup>                                                                          | -1767.5704 | -1765.9200        | -1766.2646        | -1767.2227 |
| Na[BAr <sup>F</sup> <sub>20</sub> ] <sup>-</sup> ...BnCl...PPh <sub>3</sub>                                                     | -4866.3939 | -4861.1288        | -4861.6313        | -4865.8884 |
| TS <sup>M</sup>                                                                                                                 | -4866.3761 | -4861.1101        | -4861.6153        | -4865.8679 |
| TS <sup>M</sup> -a                                                                                                              | -4866.3729 | -4861.1081        | -4861.6104        | -4865.8676 |
| TS <sup>M</sup> -b                                                                                                              | -4866.3732 | -4861.1085        | -4861.6117        | -4865.8670 |
| TS <sup>M</sup> -c                                                                                                              | -4866.3720 | -4861.1058        | -4861.6101        | -4865.8646 |
| TS <sup>M</sup> -d                                                                                                              | -4866.3687 | -4861.1012        | -4861.6035        | -4865.8633 |
| TS <sup>M</sup> -e                                                                                                              | -4866.3685 | -4861.1013        | -4861.6046        | -4865.8623 |
| TS <sup>M</sup> -f                                                                                                              | -4866.3671 | -4861.0985        | -4861.6018        | -4865.8607 |
| TS <sup>M</sup> -g                                                                                                              | -4866.3677 | -4861.1004        | -4861.6066        | -4865.8585 |
| [Bn-PPh <sub>3</sub> ] <sup>+</sup> ...NaCl...[BAr <sup>F</sup> <sub>20</sub> ] <sup>-</sup>                                    | -4866.4497 | -4861.1744        | -4861.6794        | -4865.9417 |
| Na[BAr <sup>F</sup> <sub>20</sub> ] <sup>-</sup> ...Na[BAr <sup>F</sup> <sub>20</sub> ] <sup>-</sup> ...BnCl...PPh <sub>3</sub> | -7965.2608 | -7956.3684        | -7957.0400        | -7964.5861 |
| TS <sup>P</sup>                                                                                                                 | -7965.2411 | -7956.3481        | -7957.0183        | -7964.5679 |

|                                                                                   |            |            |            |            |
|-----------------------------------------------------------------------------------|------------|------------|------------|------------|
| <b>[BAr<sup>F</sup><sub>20</sub>]<sup>-</sup>Na[BAr<sup>F</sup><sub>20</sub>]</b> | -6035.4912 | -6028.2971 | -6028.5984 | -6035.1870 |
| <b>[Bn-PPh<sub>3</sub>]<sup>+</sup></b>                                           | -1307.1846 | -1305.6968 | -1306.0456 | -1306.8328 |

## Cartesian coordinates of the reported structures

Cartesian coordinates of the optimized geometries are given below in standard XYZ format (units are in Å). The first line is the molecule name (as defined above in Table S1), the second line indicates total number of atoms.

### BnCl

15

|    |           |           |           |
|----|-----------|-----------|-----------|
| C  | -1.689123 | 0.484596  | -0.467371 |
| C  | -0.299046 | 0.447282  | -0.567534 |
| C  | 0.471289  | 1.547393  | -0.172380 |
| C  | -0.173191 | 2.684399  | 0.329734  |
| C  | -1.562917 | 2.722783  | 0.430982  |
| C  | -2.323622 | 1.622466  | 0.032720  |
| H  | -2.280227 | -0.378626 | -0.782312 |
| H  | 0.196846  | -0.445686 | -0.957974 |
| H  | 0.421555  | 3.546768  | 0.643311  |
| H  | -2.055085 | 3.616721  | 0.821346  |
| H  | -3.413029 | 1.652676  | 0.110639  |
| C  | 1.967281  | 1.499061  | -0.260297 |
| H  | 2.308462  | 0.826221  | -1.056203 |
| H  | 2.399530  | 2.494401  | -0.418257 |
| Cl | 2.704204  | 0.870950  | 1.279478  |

### Bn<sup>+</sup>

14

|   |           |           |           |
|---|-----------|-----------|-----------|
| C | -1.617776 | 0.395521  | -0.214380 |
| C | -0.246405 | 0.394488  | -0.319851 |
| C | 0.480011  | 1.628167  | -0.192792 |
| C | -0.235495 | 2.851683  | 0.044014  |
| C | -1.607134 | 2.832434  | 0.144826  |
| C | -2.288394 | 1.609525  | 0.015603  |
| H | -2.185587 | -0.530799 | -0.307657 |
| H | 0.307517  | -0.529607 | -0.499701 |
| H | 0.326651  | 3.783206  | 0.139144  |
| H | -2.166754 | 3.751155  | 0.324022  |
| H | -3.378256 | 1.602086  | 0.097170  |
| C | 1.845390  | 1.638863  | -0.298330 |
| H | 2.403221  | 0.715146  | -0.481093 |
| H | 2.410072  | 2.571378  | -0.202502 |

### Cl<sup>-</sup>

1

|    |           |          |           |
|----|-----------|----------|-----------|
| Cl | -2.565130 | 0.891478 | -0.023344 |
|----|-----------|----------|-----------|

### Na[BAr<sup>F</sup><sub>20</sub>]

46

|   |           |           |           |
|---|-----------|-----------|-----------|
| B | -1.307678 | -0.766735 | 0.039487  |
| C | 0.208840  | -0.825117 | -0.615395 |
| C | 1.397785  | -1.061923 | 0.071088  |
| C | 0.343373  | -0.778229 | -2.004327 |
| C | 2.633410  | -1.203588 | -0.561130 |
| C | 1.551248  | -0.912284 | -2.676813 |
| C | 2.712960  | -1.129721 | -1.944175 |
| C | -1.313656 | -0.623738 | 1.690317  |
| C | -0.649238 | 0.459839  | 2.271980  |
| C | -2.029738 | -1.389194 | 2.599726  |
| C | -0.657803 | 0.740365  | 3.632817  |

|    |           |           |           |
|----|-----------|-----------|-----------|
| C  | -2.081003 | -1.153371 | 3.971020  |
| C  | -1.385414 | -0.074128 | 4.495202  |
| C  | -1.941330 | -2.201002 | -0.518868 |
| C  | -2.869960 | -2.356194 | -1.550059 |
| C  | -1.371645 | -3.400546 | -0.075636 |
| C  | -3.232079 | -3.596085 | -2.086701 |
| C  | -1.698930 | -4.654230 | -0.579460 |
| C  | -2.641046 | -4.753943 | -1.599451 |
| C  | -2.180830 | 0.567313  | -0.414431 |
| C  | -3.527501 | 0.656764  | -0.077376 |
| C  | -1.676250 | 1.725176  | -1.006646 |
| C  | -4.350077 | 1.745362  | -0.323586 |
| C  | -2.454967 | 2.851701  | -1.276319 |
| C  | -3.800430 | 2.866006  | -0.935383 |
| F  | 1.423623  | -1.182045 | 1.400783  |
| F  | 3.732363  | -1.422019 | 0.153086  |
| F  | 3.879295  | -1.264982 | -2.559612 |
| F  | 1.605189  | -0.843649 | -4.002481 |
| F  | -0.738251 | -0.585338 | -2.767998 |
| F  | -0.454547 | -3.376655 | 0.890264  |
| F  | -1.126597 | -5.748343 | -0.101041 |
| F  | -2.973495 | -5.935052 | -2.090739 |
| F  | -4.133431 | -3.669182 | -3.055597 |
| F  | -3.492023 | -1.304203 | -2.089683 |
| F  | -2.775316 | -2.450086 | 2.189908  |
| F  | -2.798940 | -1.938006 | 4.764937  |
| F  | -1.414686 | 0.179453  | 5.794432  |
| F  | 0.009538  | 1.779882  | 4.114876  |
| F  | 0.055349  | 1.292249  | 1.503084  |
| F  | -4.133678 | -0.393230 | 0.539731  |
| F  | -5.631643 | 1.726907  | 0.019828  |
| F  | -4.548713 | 3.929212  | -1.186104 |
| F  | -1.912279 | 3.917545  | -1.849733 |
| F  | -0.393286 | 1.829923  | -1.350064 |
| Na | -4.543669 | -2.580403 | 0.780548  |

**Bn<sup>+</sup>[BAr<sup>F</sup><sub>20</sub>]<sup>-</sup>**

59

|   |           |           |           |
|---|-----------|-----------|-----------|
| B | -1.756656 | -0.816813 | 0.194461  |
| C | -0.427803 | -0.866274 | -0.795815 |
| C | 0.899331  | -1.051785 | -0.414276 |
| C | -0.625602 | -0.857523 | -2.175672 |
| C | 1.951401  | -1.168973 | -1.324695 |
| C | 0.385215  | -0.966461 | -3.120037 |
| C | 1.696957  | -1.125040 | -2.688202 |
| C | -1.376696 | -0.644031 | 1.794520  |
| C | -0.618611 | 0.461013  | 2.185924  |
| C | -1.845618 | -1.422860 | 2.849562  |
| C | -0.304217 | 0.765778  | 3.504236  |
| C | -1.556510 | -1.156088 | 4.188364  |
| C | -0.781984 | -0.054180 | 4.520483  |
| C | -2.496616 | -2.253049 | -0.172692 |
| C | -3.671280 | -2.416440 | -0.902136 |
| C | -1.834785 | -3.446891 | 0.121170  |
| C | -4.169739 | -3.656959 | -1.297937 |
| C | -2.295504 | -4.706169 | -0.244143 |
| C | -3.478020 | -4.813176 | -0.968508 |
| C | -2.728693 | 0.502056  | -0.066182 |

|   |           |           |           |
|---|-----------|-----------|-----------|
| C | -3.952199 | 0.570345  | 0.604805  |
| C | -2.419363 | 1.641549  | -0.803507 |
| C | -4.830248 | 1.644568  | 0.529274  |
| C | -3.260439 | 2.750311  | -0.893571 |
| C | -4.479997 | 2.750947  | -0.235005 |
| F | 1.251879  | -1.139286 | 0.869684  |
| F | 3.197300  | -1.334050 | -0.892864 |
| F | 2.686487  | -1.234404 | -3.564320 |
| F | 0.108033  | -0.920115 | -4.422463 |
| F | -1.867058 | -0.719454 | -2.662338 |
| F | -0.682013 | -3.415971 | 0.797559  |
| F | -1.615832 | -5.801392 | 0.079391  |
| F | -3.936246 | -6.002245 | -1.337192 |
| F | -5.296928 | -3.734632 | -2.002616 |
| F | -4.403891 | -1.366497 | -1.290803 |
| F | -2.624510 | -2.487421 | 2.639378  |
| F | -2.029690 | -1.944170 | 5.149225  |
| F | -0.501266 | 0.214590  | 5.789098  |
| F | 0.436196  | 1.829295  | 3.801437  |
| F | -0.137753 | 1.297199  | 1.257833  |
| F | -4.351276 | -0.457301 | 1.359617  |
| F | -5.996914 | 1.619609  | 1.164809  |
| F | -5.310787 | 3.777856  | -0.360317 |
| F | -2.922449 | 3.793000  | -1.652216 |
| F | -1.279875 | 1.745024  | -1.496944 |
| C | -2.669887 | 1.639535  | -4.369364 |
| H | -2.503567 | 2.672156  | -4.049335 |
| C | -3.871004 | 1.019963  | -4.151937 |
| C | -4.056671 | -0.352221 | -4.534895 |
| C | -4.925352 | 1.712274  | -3.464807 |
| C | -5.228762 | -0.996552 | -4.220520 |
| H | -3.246481 | -0.869638 | -5.051756 |
| C | -6.085497 | 1.046425  | -3.144698 |
| H | -4.783613 | 2.761387  | -3.198127 |
| C | -6.227612 | -0.301061 | -3.517680 |
| H | -5.379276 | -2.043396 | -4.484536 |
| H | -6.886029 | 1.550858  | -2.602343 |
| H | -7.145202 | -0.829519 | -3.247477 |
| H | -1.841124 | 1.111844  | -4.849305 |

### NaCl

2

|    |           |          |          |
|----|-----------|----------|----------|
| Na | 0.662396  | 0.830671 | 0.000000 |
| Cl | -1.774441 | 0.830671 | 0.000000 |

### PPh<sub>3</sub>

34

|   |           |           |           |
|---|-----------|-----------|-----------|
| P | -4.087650 | 0.040965  | 0.015500  |
| C | -3.191164 | -1.568555 | 0.073897  |
| C | -3.738344 | -2.627830 | -0.665762 |
| C | -2.018227 | -1.791452 | 0.806082  |
| C | -3.116568 | -3.875049 | -0.689916 |
| H | -4.661497 | -2.473862 | -1.232820 |
| C | -1.402529 | -3.043922 | 0.791764  |
| H | -1.575465 | -0.982578 | 1.391962  |
| C | -1.946898 | -4.086234 | 0.041849  |
| H | -3.552480 | -4.688065 | -1.275438 |
| H | -0.488502 | -3.203598 | 1.368904  |

|   |           |           |           |
|---|-----------|-----------|-----------|
| H | -1.462386 | -5.065489 | 0.030835  |
| C | -3.259949 | 0.991331  | 1.360559  |
| C | -2.177899 | 1.858218  | 1.162078  |
| C | -3.762624 | 0.823254  | 2.659571  |
| C | -1.605868 | 2.534258  | 2.240764  |
| H | -1.771892 | 2.007480  | 0.158809  |
| C | -3.183480 | 1.489143  | 3.738500  |
| H | -4.616009 | 0.159762  | 2.829917  |
| C | -2.103684 | 2.348673  | 3.530335  |
| H | -0.762766 | 3.208230  | 2.070602  |
| H | -3.582923 | 1.343168  | 4.744978  |
| H | -1.653008 | 2.877361  | 4.373664  |
| C | -3.381334 | 0.821825  | -1.497160 |
| C | -4.023365 | 1.974586  | -1.974022 |
| C | -2.263462 | 0.336989  | -2.187715 |
| C | -3.547087 | 2.639544  | -3.102516 |
| H | -4.905694 | 2.359145  | -1.453332 |
| C | -1.794133 | 0.995911  | -3.325134 |
| H | -1.748945 | -0.560772 | -1.837078 |
| C | -2.431083 | 2.149254  | -3.782519 |
| H | -4.054934 | 3.539466  | -3.457616 |
| H | -0.921546 | 0.605313  | -3.854357 |
| H | -2.060762 | 2.664365  | -4.672111 |

**Na[BAr<sup>F</sup><sub>20</sub>]<sup>-</sup>PPh<sub>3</sub>**

80

|   |           |           |           |
|---|-----------|-----------|-----------|
| B | -2.076441 | -1.460407 | 1.157666  |
| C | -0.530028 | -1.273473 | 0.601023  |
| C | 0.602737  | -0.997261 | 1.363077  |
| C | -0.270230 | -1.534256 | -0.745934 |
| C | 1.891766  | -0.946357 | 0.831352  |
| C | 0.994145  | -1.493998 | -1.319361 |
| C | 2.091218  | -1.196730 | -0.518399 |
| C | -2.271170 | -0.942470 | 2.724846  |
| C | -1.984216 | 0.392840  | 3.024075  |
| C | -2.745103 | -1.661256 | 3.815343  |
| C | -2.092101 | 0.950964  | 4.291405  |
| C | -2.862758 | -1.157860 | 5.108358  |
| C | -2.526480 | 0.163905  | 5.351584  |
| C | -2.294949 | -3.100620 | 0.965403  |
| C | -3.080652 | -3.737168 | 0.001659  |
| C | -1.497744 | -3.972664 | 1.716334  |
| C | -3.124582 | -5.124079 | -0.169808 |
| C | -1.508043 | -5.356183 | 1.581880  |
| C | -2.334632 | -5.940924 | 0.627373  |
| C | -3.177167 | -0.542880 | 0.325489  |
| C | -4.535851 | -0.746946 | 0.532150  |
| C | -2.898258 | 0.544411  | -0.502753 |
| C | -5.560250 | -0.000497 | -0.029421 |
| C | -3.886589 | 1.332830  | -1.094188 |
| C | -5.228053 | 1.067397  | -0.853908 |
| F | 0.522887  | -0.771294 | 2.677082  |
| F | 2.931031  | -0.672636 | 1.613074  |
| F | 3.310352  | -1.155236 | -1.038034 |
| F | 1.164733  | -1.742012 | -2.613488 |
| F | -1.281524 | -1.835412 | -1.568955 |
| F | -0.671618 | -3.482873 | 2.640509  |
| F | -0.744470 | -6.118217 | 2.351276  |

|    |            |           |           |
|----|------------|-----------|-----------|
| F  | -2.368179  | -7.254983 | 0.483679  |
| F  | -3.914001  | -5.660423 | -1.090459 |
| F  | -3.865258  | -3.046043 | -0.828266 |
| F  | -3.130741  | -2.957382 | 3.689516  |
| F  | -3.301827  | -1.927764 | 6.096392  |
| F  | -2.614918  | 0.670848  | 6.570898  |
| F  | -1.791728  | 2.226240  | 4.499974  |
| F  | -1.531396  | 1.203538  | 2.064476  |
| F  | -4.940073  | -1.755713 | 1.343133  |
| F  | -6.831130  | -0.281914 | 0.234715  |
| F  | -6.173293  | 1.812525  | -1.405598 |
| F  | -3.549880  | 2.350539  | -1.876352 |
| F  | -1.646399  | 0.908366  | -0.777951 |
| Na | -4.836213  | -3.735100 | 2.392113  |
| P  | -6.690802  | -2.422303 | 4.196694  |
| C  | -6.991017  | -3.330315 | 5.760471  |
| C  | -5.908138  | -4.030372 | 6.311329  |
| C  | -8.225664  | -3.350491 | 6.420949  |
| C  | -6.052594  | -4.725601 | 7.511158  |
| H  | -4.938538  | -4.020430 | 5.805157  |
| C  | -8.371033  | -4.055377 | 7.615441  |
| H  | -9.081238  | -2.814017 | 6.003816  |
| C  | -7.285789  | -4.740433 | 8.163418  |
| H  | -5.199963  | -5.261304 | 7.934645  |
| H  | -9.338614  | -4.067103 | 8.122527  |
| H  | -7.402683  | -5.289923 | 9.100437  |
| C  | -8.363462  | -2.183794 | 3.482213  |
| C  | -9.172351  | -1.074429 | 3.760006  |
| C  | -8.841293  | -3.175758 | 2.614474  |
| C  | -10.436341 | -0.963143 | 3.181288  |
| H  | -8.815726  | -0.289375 | 4.430921  |
| C  | -10.108358 | -3.067716 | 2.043396  |
| H  | -8.217862  | -4.044524 | 2.380105  |
| C  | -10.906775 | -1.958700 | 2.324598  |
| H  | -11.057467 | -0.092195 | 3.402938  |
| H  | -10.469467 | -3.847940 | 1.369483  |
| H  | -11.896581 | -1.867532 | 1.871256  |
| C  | -6.221268  | -0.735380 | 4.750217  |
| C  | -5.952080  | 0.220215  | 3.759165  |
| C  | -6.078301  | -0.377611 | 6.094611  |
| C  | -5.547598  | 1.506502  | 4.103825  |
| H  | -6.076973  | -0.039816 | 2.707719  |
| C  | -5.673872  | 0.913480  | 6.438589  |
| H  | -6.276668  | -1.106295 | 6.883314  |
| C  | -5.404199  | 1.855564  | 5.447863  |
| H  | -5.337462  | 2.236404  | 3.318598  |
| H  | -5.559209  | 1.178749  | 7.491771  |
| H  | -5.072018  | 2.859543  | 5.721193  |

**Na[BAr<sup>F</sup><sub>20</sub>]<sup>-</sup>Na[BAr<sup>F</sup><sub>20</sub>]<sup>-</sup>PPh<sub>3</sub>**

126

|   |           |           |           |
|---|-----------|-----------|-----------|
| B | -7.522467 | -5.208268 | -0.336430 |
| C | -7.422208 | -3.547717 | -0.289774 |
| C | -7.503645 | -2.672494 | -1.376409 |
| C | -7.429156 | -2.914187 | 0.958384  |
| C | -7.551202 | -1.281809 | -1.245435 |
| C | -7.478530 | -1.536354 | 1.137259  |
| C | -7.539477 | -0.709480 | 0.019290  |



|    |            |           |           |
|----|------------|-----------|-----------|
| C  | -9.052136  | -5.455122 | 0.261637  |
| C  | -10.140068 | -4.957904 | -0.464536 |
| C  | -9.392285  | -5.984228 | 1.507667  |
| C  | -11.460613 | -5.022392 | -0.037836 |
| C  | -10.705141 | -6.071066 | 1.977656  |
| C  | -11.747928 | -5.585766 | 1.201492  |
| C  | -6.339798  | -5.971037 | 0.547564  |
| C  | -6.427985  | -7.343413 | 0.756167  |
| C  | -5.167032  | -5.429070 | 1.061796  |
| C  | -5.493834  | -8.122771 | 1.421828  |
| C  | -4.192622  | -6.148876 | 1.748319  |
| C  | -4.346664  | -7.516930 | 1.921187  |
| C  | -7.312555  | -5.818264 | -1.868513 |
| C  | -8.176314  | -6.634705 | -2.589325 |
| C  | -6.136777  | -5.539446 | -2.559589 |
| C  | -7.948591  | -7.074850 | -3.889824 |
| C  | -5.852175  | -5.929228 | -3.858964 |
| C  | -6.780768  | -6.707409 | -4.539909 |
| F  | -7.527621  | -3.125108 | -2.631391 |
| F  | -7.617188  | -0.508327 | -2.316886 |
| F  | -7.595436  | 0.603159  | 0.154162  |
| F  | -7.476189  | -1.013488 | 2.351502  |
| F  | -7.389035  | -3.651391 | 2.068592  |
| F  | -4.882359  | -4.114001 | 0.920490  |
| F  | -3.122208  | -5.535718 | 2.224994  |
| F  | -3.430997  | -8.224855 | 2.556758  |
| F  | -5.679037  | -9.427392 | 1.559473  |
| F  | -7.507952  | -8.013897 | 0.293437  |
| F  | -8.463245  | -6.448722 | 2.346509  |
| F  | -10.956140 | -6.607248 | 3.164630  |
| F  | -12.996667 | -5.660021 | 1.630998  |
| F  | -12.441694 | -4.552195 | -0.795084 |
| F  | -9.936719  | -4.398202 | -1.658807 |
| F  | -9.346627  | -7.061904 | -2.055180 |
| F  | -8.830139  | -7.852510 | -4.500323 |
| F  | -6.551714  | -7.093601 | -5.781821 |
| F  | -4.721090  | -5.582015 | -4.446536 |
| F  | -5.186055  | -4.782667 | -1.959140 |
| Na | -9.534202  | -8.643470 | -0.445572 |
| B  | -2.091901  | -0.731633 | -2.125159 |
| C  | -2.838701  | -0.567987 | -3.597378 |
| C  | -4.164992  | -0.959750 | -3.743189 |
| C  | -2.310156  | 0.039148  | -4.736275 |
| C  | -4.921589  | -0.842049 | -4.898942 |
| C  | -3.024289  | 0.193185  | -5.925234 |
| C  | -4.336995  | -0.249236 | -6.011963 |
| C  | -2.936526  | 0.339890  | -1.177339 |
| C  | -3.780163  | 0.068936  | -0.108630 |
| C  | -2.898812  | 1.694978  | -1.521459 |
| C  | -4.501308  | 1.024564  | 0.601478  |
| C  | -3.606400  | 2.690800  | -0.859206 |
| C  | -4.423219  | 2.353452  | 0.215565  |
| C  | -0.469155  | -0.414904 | -2.169256 |
| C  | 0.232878   | 0.433355  | -1.315790 |
| C  | 0.335348   | -1.148249 | -3.043964 |
| C  | 1.620522   | 0.576136  | -1.346665 |
| C  | 1.718149   | -1.038081 | -3.111862 |
| C  | 2.370144   | -0.163896 | -2.249199 |

|    |            |            |           |
|----|------------|------------|-----------|
| C  | -2.090017  | -2.302897  | -1.564637 |
| C  | -1.598823  | -2.557719  | -0.278272 |
| C  | -2.349141  | -3.454025  | -2.313492 |
| C  | -1.405935  | -3.829226  | 0.250412  |
| C  | -2.177185  | -4.750661  | -1.821765 |
| C  | -1.709415  | -4.941077  | -0.529848 |
| F  | -4.805541  | -1.536519  | -2.692529 |
| F  | -6.170859  | -1.281641  | -4.951107 |
| F  | -5.022439  | -0.109920  | -7.136503 |
| F  | -2.456503  | 0.773043   | -6.975015 |
| F  | -1.069146  | 0.524119   | -4.756589 |
| F  | -0.228410  | -2.015254  | -3.892920 |
| F  | 2.418075   | -1.759402  | -3.980832 |
| F  | 3.689710   | -0.041135  | -2.288580 |
| F  | 2.229126   | 1.407764   | -0.507740 |
| F  | -0.391352  | 1.167208   | -0.390888 |
| F  | -2.125794  | 2.098926   | -2.531617 |
| F  | -3.509894  | 3.957028   | -1.241460 |
| F  | -5.105197  | 3.285509   | 0.861845  |
| F  | -5.258662  | 0.666201   | 1.629293  |
| F  | -3.977333  | -1.202344  | 0.327480  |
| F  | -1.277263  | -1.538047  | 0.517206  |
| F  | -0.937460  | -3.984799  | 1.477743  |
| F  | -1.552928  | -6.165719  | -0.053456 |
| F  | -2.460428  | -5.800318  | -2.579681 |
| F  | -2.798041  | -3.379981  | -3.567127 |
| Na | -4.748927  | -2.856589  | -0.933426 |
| P  | -8.005688  | -10.554684 | -2.034256 |
| C  | -6.494684  | -9.949023  | -2.883403 |
| C  | -5.554051  | -9.257087  | -2.106362 |
| C  | -6.260486  | -10.099789 | -4.253505 |
| C  | -4.400943  | -8.731446  | -2.679681 |
| H  | -5.718074  | -9.149371  | -1.034536 |
| C  | -5.100500  | -9.574817  | -4.828521 |
| H  | -6.981951  | -10.624894 | -4.883063 |
| C  | -4.172209  | -8.888261  | -4.048442 |
| H  | -3.684089  | -8.189352  | -2.058973 |
| H  | -4.929831  | -9.696490  | -5.900265 |
| H  | -3.274394  | -8.466320  | -4.504975 |
| C  | -8.901500  | -11.501777 | -3.320476 |
| C  | -8.504808  | -12.777541 | -3.744200 |
| C  | -10.024355 | -10.903700 | -3.906176 |
| C  | -9.216623  | -13.437418 | -4.743729 |
| H  | -7.634127  | -13.259303 | -3.292439 |
| C  | -10.732616 | -11.562935 | -4.911405 |
| H  | -10.346957 | -9.911891  | -3.577070 |
| C  | -10.328896 | -12.830003 | -5.330279 |
| H  | -8.900925  | -14.431765 | -5.067851 |
| H  | -11.604512 | -11.085919 | -5.364666 |
| H  | -10.884343 | -13.349309 | -6.114778 |
| C  | -7.365822  | -11.854741 | -0.903625 |
| C  | -8.223043  | -12.290511 | 0.117341  |
| C  | -6.088302  | -12.419408 | -1.004942 |
| C  | -7.815437  | -13.276078 | 1.014452  |
| H  | -9.225904  | -11.861113 | 0.213856  |
| C  | -5.678062  | -13.399319 | -0.100696 |
| H  | -5.403639  | -12.094228 | -1.791468 |
| C  | -6.538940  | -13.829571 | 0.908606  |

|   |           |            |           |
|---|-----------|------------|-----------|
| H | -8.494393 | -13.607301 | 1.803507  |
| H | -4.677696 | -13.829493 | -0.188197 |
| H | -6.213588 | -14.595603 | 1.616216  |

**Na[BAr<sup>F</sup><sub>20</sub>]<sup>-</sup>Na[BAr<sup>F</sup><sub>20</sub>]**

92

|    |            |           |           |
|----|------------|-----------|-----------|
| B  | -7.027525  | -5.335344 | -0.674093 |
| C  | -7.128554  | -3.676371 | -0.602181 |
| C  | -7.213324  | -2.801714 | -1.689330 |
| C  | -7.341055  | -3.068764 | 0.641284  |
| C  | -7.447223  | -1.430371 | -1.558911 |
| C  | -7.585255  | -1.711669 | 0.818307  |
| C  | -7.635737  | -0.881548 | -0.297864 |
| C  | -8.565202  | -5.747410 | -0.196824 |
| C  | -9.643200  | -5.356396 | -1.000097 |
| C  | -8.935104  | -6.277624 | 1.040876  |
| C  | -10.977653 | -5.486945 | -0.633830 |
| C  | -10.262648 | -6.424104 | 1.453710  |
| C  | -11.291751 | -6.028064 | 0.609869  |
| C  | -5.847692  | -5.994758 | 0.292431  |
| C  | -5.757868  | -7.380593 | 0.398609  |
| C  | -4.832044  | -5.337972 | 0.978104  |
| C  | -4.803528  | -8.073939 | 1.127686  |
| C  | -3.853837  | -5.968985 | 1.742164  |
| C  | -3.829466  | -7.354311 | 1.812289  |
| C  | -6.617833  | -5.899408 | -2.178169 |
| C  | -7.281711  | -6.860858 | -2.929625 |
| C  | -5.428841  | -5.476183 | -2.765601 |
| C  | -6.850357  | -7.334162 | -4.165907 |
| C  | -4.946564  | -5.892414 | -3.997392 |
| C  | -5.671144  | -6.843648 | -4.709420 |
| F  | -7.060496  | -3.235654 | -2.940657 |
| F  | -7.498136  | -0.653216 | -2.627975 |
| F  | -7.866656  | 0.411704  | -0.165062 |
| F  | -7.775042  | -1.213298 | 2.027634  |
| F  | -7.320842  | -3.812954 | 1.747552  |
| F  | -4.717417  | -3.990544 | 0.938219  |
| F  | -2.949167  | -5.254028 | 2.388827  |
| F  | -2.904796  | -7.977827 | 2.519294  |
| F  | -4.815878  | -9.396609 | 1.176705  |
| F  | -6.678852  | -8.155370 | -0.228464 |
| F  | -8.018408  | -6.687202 | 1.921732  |
| F  | -10.540910 | -6.946265 | 2.638671  |
| F  | -12.551901 | -6.168675 | 0.978960  |
| F  | -11.945290 | -5.105162 | -1.451729 |
| F  | -9.410072  | -4.816792 | -2.195895 |
| F  | -8.424444  | -7.435260 | -2.478867 |
| F  | -7.548743  | -8.255386 | -4.811661 |
| F  | -5.241522  | -7.274580 | -5.882184 |
| F  | -3.823678  | -5.403547 | -4.492639 |
| F  | -4.666336  | -4.562975 | -2.119555 |
| Na | -8.829265  | -8.694348 | -0.608493 |
| B  | -2.038315  | -0.239428 | -1.804299 |
| C  | -2.642521  | -0.157212 | -3.346667 |
| C  | -3.893709  | -0.697872 | -3.623034 |
| C  | -2.074489  | 0.513707  | -4.429266 |
| C  | -4.538938  | -0.658858 | -4.849483 |
| C  | -2.678561  | 0.593780  | -5.684605 |

|    |           |           |           |
|----|-----------|-----------|-----------|
| C  | -3.916985 | 0.005462  | -5.900286 |
| C  | -3.103963 | 0.710940  | -0.955078 |
| C  | -4.016348 | 0.325911  | 0.018110  |
| C  | -3.198818 | 2.063667  | -1.297100 |
| C  | -4.918753 | 1.178545  | 0.647480  |
| C  | -4.089524 | 2.957721  | -0.715364 |
| C  | -4.965933 | 2.510876  | 0.268655  |
| C  | -0.471186 | 0.273450  | -1.679734 |
| C  | 0.028006  | 1.198462  | -0.765466 |
| C  | 0.504775  | -0.355495 | -2.455730 |
| C  | 1.383260  | 1.510229  | -0.651536 |
| C  | 1.863411  | -0.078524 | -2.376946 |
| C  | 2.309114  | 0.867129  | -1.459941 |
| C  | -1.904382 | -1.801552 | -1.235819 |
| C  | -1.525701 | -2.000987 | 0.097516  |
| C  | -1.950590 | -2.972668 | -1.997036 |
| C  | -1.247779 | -3.243726 | 0.655741  |
| C  | -1.690754 | -4.243744 | -1.476691 |
| C  | -1.335683 | -4.380563 | -0.142435 |
| F  | -4.565611 | -1.350035 | -2.638077 |
| F  | -5.717759 | -1.237694 | -5.026972 |
| F  | -4.497945 | 0.074270  | -7.088450 |
| F  | -2.078271 | 1.241240  | -6.675021 |
| F  | -0.902324 | 1.139193  | -4.325580 |
| F  | 0.143309  | -1.282173 | -3.350530 |
| F  | 2.734484  | -0.708984 | -3.157338 |
| F  | 3.600776  | 1.148861  | -1.360318 |
| F  | 1.793602  | 2.408481  | 0.237645  |
| F  | -0.775276 | 1.845831  | 0.082609  |
| F  | -2.380323 | 2.570554  | -2.221455 |
| F  | -4.112180 | 4.229793  | -1.089562 |
| F  | -5.821783 | 3.344643  | 0.837709  |
| F  | -5.730981 | 0.718362  | 1.589286  |
| F  | -4.101449 | -0.965119 | 0.431734  |
| F  | -1.411429 | -0.953071 | 0.912771  |
| F  | -0.899644 | -3.350708 | 1.927478  |
| F  | -1.081747 | -5.577800 | 0.358902  |
| F  | -1.779399 | -5.318072 | -2.246506 |
| F  | -2.271842 | -2.946440 | -3.291256 |
| Na | -4.503474 | -2.706137 | -0.895555 |

**Na[BAr<sup>F</sup><sub>20</sub>]<sup>-</sup>Na[BAr<sup>F</sup><sub>20</sub>]-f**

92

|   |           |           |           |
|---|-----------|-----------|-----------|
| B | -1.796573 | -0.469942 | -1.621973 |
| C | -0.304712 | 0.205669  | -1.420201 |
| C | 0.767324  | -0.304688 | -2.154341 |
| C | 0.044528  | 1.177479  | -0.485790 |
| C | 2.080491  | 0.127007  | -2.019687 |
| C | 1.349032  | 1.641963  | -0.315057 |
| C | 2.375123  | 1.113885  | -1.085279 |
| C | -1.548492 | -2.014040 | -1.053317 |
| C | -1.251304 | -2.192657 | 0.302758  |
| C | -1.470794 | -3.182193 | -1.816038 |
| C | -0.961962 | -3.422652 | 0.884639  |
| C | -1.190481 | -4.440362 | -1.274517 |
| C | -0.933722 | -4.561923 | 0.084697  |
| C | -2.334063 | -0.434471 | -3.192471 |
| C | -3.507667 | -1.101889 | -3.528490 |

|    |            |           |           |
|----|------------|-----------|-----------|
| C  | -1.805314  | 0.323141  | -4.236918 |
| C  | -4.125535  | -1.071465 | -4.769053 |
| C  | -2.376474  | 0.381424  | -5.509244 |
| C  | -3.543283  | -0.319226 | -5.782108 |
| C  | -3.010528  | 0.349651  | -0.833475 |
| C  | -3.948399  | -0.153832 | 0.058425  |
| C  | -3.248607  | 1.680339  | -1.191977 |
| C  | -5.034043  | 0.555581  | 0.563133  |
| C  | -4.308510  | 2.441461  | -0.714055 |
| C  | -5.220827  | 1.870573  | 0.167949  |
| F  | 0.549806   | -1.261352 | -3.064096 |
| F  | 3.050071   | -0.394172 | -2.763599 |
| F  | 3.620469   | 1.542665  | -0.932684 |
| F  | 1.616592   | 2.577644  | 0.589881  |
| F  | -0.865473  | 1.725071  | 0.323687  |
| F  | -0.709172  | 1.063635  | -4.075968 |
| F  | -1.815495  | 1.117352  | -6.460498 |
| F  | -4.098645  | -0.264266 | -6.983038 |
| F  | -5.254792  | -1.735666 | -4.989503 |
| F  | -4.130939  | -1.858236 | -2.594260 |
| F  | -1.691163  | -3.171603 | -3.130461 |
| F  | -1.174755  | -5.515502 | -2.048192 |
| F  | -0.663343  | -5.743463 | 0.609257  |
| F  | -0.721508  | -3.519445 | 2.182141  |
| F  | -1.256945  | -1.142930 | 1.122046  |
| F  | -3.882657  | -1.437970 | 0.497353  |
| F  | -5.892446  | -0.025906 | 1.390462  |
| F  | -6.250510  | 2.570235  | 0.618247  |
| F  | -4.465880  | 3.700485  | -1.100829 |
| F  | -2.421191  | 2.294213  | -2.040849 |
| Na | -4.065396  | -3.223061 | -0.790477 |
| B  | -7.250330  | -5.113251 | -0.810907 |
| C  | -8.132933  | -3.721769 | -0.615623 |
| C  | -9.499331  | -3.616093 | -0.388194 |
| C  | -7.520421  | -2.489735 | -0.832466 |
| C  | -10.204445 | -2.415933 | -0.346833 |
| C  | -8.162146  | -1.260491 | -0.812362 |
| C  | -9.529369  | -1.221794 | -0.558580 |
| C  | -6.894896  | -5.070813 | -2.435225 |
| C  | -5.653759  | -4.873624 | -3.030516 |
| C  | -7.936507  | -5.083605 | -3.359718 |
| C  | -5.442825  | -4.701298 | -4.395541 |
| C  | -7.798361  | -4.930781 | -4.731111 |
| C  | -6.527519  | -4.727314 | -5.259599 |
| C  | -8.053635  | -6.485296 | -0.336908 |
| C  | -8.179120  | -7.669501 | -1.064833 |
| C  | -8.492596  | -6.573441 | 0.989182  |
| C  | -8.706884  | -8.850254 | -0.533794 |
| C  | -9.025832  | -7.723338 | 1.559100  |
| C  | -9.133519  | -8.877292 | 0.787670  |
| C  | -5.906820  | -5.185562 | 0.162591  |
| C  | -5.020875  | -6.256386 | -0.003085 |
| C  | -5.619883  | -4.364907 | 1.256329  |
| C  | -3.916896  | -6.490328 | 0.808377  |
| C  | -4.513865  | -4.552877 | 2.090362  |
| C  | -3.659917  | -5.625581 | 1.868709  |
| F  | -10.267265 | -4.721553 | -0.220123 |
| F  | -11.511065 | -2.412623 | -0.129712 |

|    |            |           |           |
|----|------------|-----------|-----------|
| F  | -10.176014 | -0.070056 | -0.535211 |
| F  | -7.496906  | -0.140502 | -1.046890 |
| F  | -6.197568  | -2.450014 | -1.091588 |
| F  | -8.404688  | -5.505820 | 1.781783  |
| F  | -9.431276  | -7.730786 | 2.818711  |
| F  | -9.640823  | -9.981486 | 1.304954  |
| F  | -8.803252  | -9.937776 | -1.283595 |
| F  | -7.794685  | -7.740487 | -2.342802 |
| F  | -9.209477  | -5.263386 | -2.923900 |
| F  | -8.854765  | -4.967765 | -5.528054 |
| F  | -6.358938  | -4.558649 | -6.558358 |
| F  | -4.223139  | -4.494274 | -4.862105 |
| F  | -4.524604  | -4.805693 | -2.287102 |
| F  | -5.213331  | -7.120009 | -0.999510 |
| F  | -3.115399  | -7.517094 | 0.581032  |
| F  | -2.619655  | -5.822314 | 2.655628  |
| F  | -4.276686  | -3.716038 | 3.087570  |
| F  | -6.392227  | -3.323199 | 1.563853  |
| Na | -10.713990 | -6.402870 | -1.705536 |

**Na[BAr<sup>F</sup><sub>20</sub>]<sup>-</sup>Na[BAr<sup>F</sup><sub>20</sub>]-e**

92

|   |            |           |           |
|---|------------|-----------|-----------|
| B | -7.054773  | -5.425396 | -0.579739 |
| C | -7.250454  | -3.822430 | -0.967724 |
| C | -7.133885  | -2.728031 | -0.109281 |
| C | -7.738735  | -3.504440 | -2.240679 |
| C | -7.438701  | -1.416927 | -0.487793 |
| C | -8.048592  | -2.217855 | -2.661743 |
| C | -7.881264  | -1.157290 | -1.777710 |
| C | -8.640380  | -5.928430 | -0.614689 |
| C | -9.526892  | -5.379901 | 0.320023  |
| C | -9.256313  | -6.699283 | -1.603094 |
| C | -10.900960 | -5.586288 | 0.309161  |
| C | -10.634381 | -6.931314 | -1.656617 |
| C | -11.463116 | -6.371190 | -0.693718 |
| C | -6.303440  | -5.693575 | 0.875247  |
| C | -5.019205  | -5.201657 | 1.089869  |
| C | -6.752078  | -6.493586 | 1.920074  |
| C | -4.252096  | -5.412681 | 2.225095  |
| C | -6.034062  | -6.755295 | 3.084077  |
| C | -4.768907  | -6.206474 | 3.243573  |
| C | -6.082463  | -6.236204 | -1.650334 |
| C | -5.262769  | -5.684753 | -2.630017 |
| C | -5.982228  | -7.621511 | -1.571894 |
| C | -4.491407  | -6.427179 | -3.520673 |
| C | -5.216072  | -8.419250 | -2.407967 |
| C | -4.458329  | -7.810192 | -3.402813 |
| F | -6.691513  | -2.878153 | 1.143229  |
| F | -7.295819  | -0.418803 | 0.368967  |
| F | -8.143987  | 0.079219  | -2.157297 |
| F | -8.489845  | -1.996327 | -3.888238 |
| F | -7.924112  | -4.474885 | -3.136076 |
| F | -7.952016  | -7.121499 | 1.853586  |
| F | -6.543697  | -7.536209 | 4.023865  |
| F | -4.066845  | -6.439119 | 4.337723  |
| F | -3.048071  | -4.877864 | 2.338246  |
| F | -4.430854  | -4.445198 | 0.132836  |
| F | -8.547659  | -7.279115 | -2.575959 |

|    |            |           |           |
|----|------------|-----------|-----------|
| F  | -11.148591 | -7.684264 | -2.617213 |
| F  | -12.765725 | -6.586290 | -0.723422 |
| F  | -11.674285 | -5.047561 | 1.238077  |
| F  | -9.054935  | -4.606274 | 1.296866  |
| F  | -5.162530  | -4.344581 | -2.781616 |
| F  | -3.788199  | -5.826707 | -4.464398 |
| F  | -3.723140  | -8.537812 | -4.225084 |
| F  | -5.205876  | -9.736053 | -2.269711 |
| F  | -6.706007  | -8.287674 | -0.635531 |
| Na | -8.660067  | -8.734071 | 0.383087  |
| B  | -2.025748  | -0.139645 | -1.880862 |
| C  | -2.772067  | 0.091442  | -3.344541 |
| C  | -4.088631  | -0.320407 | -3.519613 |
| C  | -2.269056  | 0.803121  | -4.434559 |
| C  | -4.857867  | -0.125603 | -4.655821 |
| C  | -2.994067  | 1.031050  | -5.605278 |
| C  | -4.295810  | 0.563290  | -5.723651 |
| C  | -1.897029  | -1.733049 | -1.410432 |
| C  | -2.039118  | -2.863500 | -2.216250 |
| C  | -1.415490  | -2.004537 | -0.123767 |
| C  | -1.748866  | -4.161120 | -1.783457 |
| C  | -1.122004  | -3.276275 | 0.351096  |
| C  | -1.303430  | -4.370943 | -0.486503 |
| C  | -2.958784  | 0.765931  | -0.855390 |
| C  | -3.817703  | 0.304224  | 0.134454  |
| C  | -2.978846  | 2.152651  | -1.018283 |
| C  | -4.568665  | 1.124714  | 0.972094  |
| C  | -3.726265  | 3.017971  | -0.228983 |
| C  | -4.529660  | 2.498423  | 0.780607  |
| C  | -0.427490  | 0.295535  | -1.879269 |
| C  | 0.430900   | -0.324340 | -2.790444 |
| C  | 0.213481   | 1.124053  | -0.960453 |
| C  | 1.804335   | -0.123805 | -2.833473 |
| C  | 1.589651   | 1.355762  | -0.964874 |
| C  | 2.392778   | 0.728194  | -1.905468 |
| F  | -4.721049  | -0.975242 | -2.510222 |
| F  | -6.102600  | -0.578642 | -4.722608 |
| F  | -4.991625  | 0.775417  | -6.829700 |
| F  | -2.447223  | 1.707252  | -6.607037 |
| F  | -1.047478  | 1.334874  | -4.417740 |
| F  | -2.220289  | 2.717975  | -1.960948 |
| F  | -3.680373  | 4.328901  | -0.427716 |
| F  | -5.241649  | 3.304668  | 1.553657  |
| F  | -5.316245  | 0.608970  | 1.937347  |
| F  | -3.983371  | -1.025554 | 0.352721  |
| F  | -1.209164  | -1.002318 | 0.729654  |
| F  | -0.683176  | -3.453107 | 1.587069  |
| F  | -1.057606  | -5.595856 | -0.054105 |
| F  | -1.908521  | -5.197844 | -2.593925 |
| F  | -2.494732  | -2.762488 | -3.470234 |
| F  | -0.068369  | -1.165798 | -3.703261 |
| F  | 2.555330   | -0.739639 | -3.740126 |
| F  | 3.702271   | 0.935448  | -1.919663 |
| F  | 2.136676   | 2.164250  | -0.063079 |
| F  | -0.460179  | 1.750311  | 0.007628  |
| Na | -4.576607  | -2.701740 | -1.195161 |

Na[BAr<sup>F</sup><sub>20</sub>]<sup>+</sup>Na[BAr<sup>F</sup><sub>20</sub>]<sup>-c</sup>

|    |           |           |           |
|----|-----------|-----------|-----------|
| B  | -1.637176 | -0.707666 | -1.136763 |
| C  | -0.556387 | 0.448321  | -1.600005 |
| C  | -0.573794 | 1.789691  | -1.226365 |
| C  | 0.411198  | 0.122844  | -2.551879 |
| C  | 0.321220  | 2.735575  | -1.727120 |
| C  | 1.323167  | 1.029177  | -3.077049 |
| C  | 1.275952  | 2.354845  | -2.659220 |
| C  | -2.602982 | -0.242367 | 0.135776  |
| C  | -1.982643 | 0.043328  | 1.356776  |
| C  | -3.989101 | -0.243559 | 0.212705  |
| C  | -2.663502 | 0.288903  | 2.542404  |
| C  | -4.725566 | -0.018586 | 1.372693  |
| C  | -4.054304 | 0.246540  | 2.555725  |
| C  | -0.925323 | -2.076182 | -0.521973 |
| C  | -1.714953 | -3.183704 | -0.232135 |
| C  | 0.400442  | -2.216104 | -0.113212 |
| C  | -1.277455 | -4.352544 | 0.369991  |
| C  | 0.897712  | -3.368303 | 0.498094  |
| C  | 0.056522  | -4.444101 | 0.748186  |
| C  | -2.465024 | -0.988012 | -2.554290 |
| C  | -2.371231 | -2.122178 | -3.365824 |
| C  | -3.239007 | 0.043769  | -3.099707 |
| C  | -3.039827 | -2.255841 | -4.586250 |
| C  | -3.923565 | -0.045968 | -4.307614 |
| C  | -3.814971 | -1.208639 | -5.066268 |
| F  | -1.473097 | 2.258768  | -0.357802 |
| F  | 0.257155  | 4.000698  | -1.325676 |
| F  | 2.131948  | 3.242402  | -3.146579 |
| F  | 2.227500  | 0.646568  | -3.972018 |
| F  | 0.501918  | -1.134825 | -2.999383 |
| F  | 1.286366  | -1.233554 | -0.272131 |
| F  | 2.173113  | -3.435683 | 0.858520  |
| F  | 0.517630  | -5.540535 | 1.330309  |
| F  | -2.111748 | -5.364136 | 0.585286  |
| F  | -3.027241 | -3.167050 | -0.564501 |
| F  | -4.753474 | -0.508076 | -0.879150 |
| F  | -6.050214 | -0.073859 | 1.350866  |
| F  | -4.723295 | 0.462003  | 3.677731  |
| F  | -2.001491 | 0.552433  | 3.660919  |
| F  | -0.650508 | 0.096296  | 1.424946  |
| F  | -1.647284 | -3.181894 | -3.004229 |
| F  | -2.932369 | -3.374105 | -5.288300 |
| F  | -4.437772 | -1.315688 | -6.224639 |
| F  | -4.664504 | 0.960410  | -4.742635 |
| F  | -3.369577 | 1.190436  | -2.435278 |
| Na | -4.699873 | -2.478467 | -1.913488 |
| B  | -7.441880 | -4.847396 | -1.314221 |
| C  | -6.727664 | -5.935857 | -2.346543 |
| C  | -7.263281 | -7.132522 | -2.807401 |
| C  | -5.400494 | -5.757107 | -2.728914 |
| C  | -6.581599 | -8.053663 | -3.598439 |
| C  | -4.664907 | -6.625038 | -3.521486 |
| C  | -5.266854 | -7.798808 | -3.963586 |
| C  | -6.551348 | -5.057561 | 0.073778  |
| C  | -5.675677 | -4.151483 | 0.660945  |
| C  | -6.523829 | -6.307990 | 0.685890  |
| C  | -4.837678 | -4.436688 | 1.735056  |



|    |            |           |           |
|----|------------|-----------|-----------|
| C  | -5.725744  | -6.656576 | 1.765335  |
| C  | -4.858972  | -5.705427 | 2.295076  |
| C  | -9.066620  | -5.096307 | -1.103631 |
| C  | -9.747323  | -5.167332 | 0.112829  |
| C  | -9.896753  | -5.059343 | -2.229089 |
| C  | -11.140753 | -5.218514 | 0.215338  |
| C  | -11.284368 | -5.111469 | -2.176045 |
| C  | -11.914982 | -5.193314 | -0.937505 |
| C  | -7.425793  | -3.288467 | -1.891919 |
| C  | -7.121734  | -2.877834 | -3.192406 |
| C  | -7.872369  | -2.258747 | -1.055009 |
| C  | -7.191813  | -1.547894 | -3.617747 |
| C  | -7.954343  | -0.923728 | -1.433439 |
| C  | -7.592997  | -0.560686 | -2.727259 |
| F  | -8.523379  | -7.507921 | -2.474960 |
| F  | -7.173606  | -9.173839 | -3.983341 |
| F  | -4.597560  | -8.657379 | -4.712014 |
| F  | -3.412169  | -6.351650 | -3.844140 |
| F  | -4.736820  | -4.649316 | -2.324812 |
| F  | -9.353039  | -4.974605 | -3.442744 |
| F  | -12.006417 | -5.089655 | -3.284662 |
| F  | -13.232041 | -5.249941 | -0.860664 |
| F  | -11.722072 | -5.296958 | 1.402692  |
| F  | -9.088607  | -5.199445 | 1.274999  |
| F  | -7.334110  | -7.293530 | 0.221375  |
| F  | -5.777406  | -7.874258 | 2.282669  |
| F  | -4.067879  | -6.008520 | 3.308255  |
| F  | -4.013350  | -3.513301 | 2.204635  |
| F  | -5.553795  | -2.898611 | 0.178340  |
| F  | -6.713707  | -3.747627 | -4.119685 |
| F  | -6.873945  | -1.225527 | -4.861947 |
| F  | -7.638816  | 0.702032  | -3.106489 |
| F  | -8.354308  | -0.000035 | -0.577297 |
| F  | -8.224782  | -2.538200 | 0.198620  |
| Na | -9.391603  | -7.980343 | -0.405478 |

**Na[BAr<sup>F</sup><sub>20</sub>]<sup>-</sup>Na[BAr<sup>F</sup><sub>20</sub>]-a**

92

|   |           |           |           |
|---|-----------|-----------|-----------|
| B | -1.922698 | -0.378594 | -1.223146 |
| C | -2.439168 | 0.800587  | -0.184014 |
| C | -3.152624 | 0.617916  | 0.992194  |
| C | -2.317454 | 2.139590  | -0.564645 |
| C | -3.689704 | 1.647892  | 1.759180  |
| C | -2.819006 | 3.207826  | 0.169341  |
| C | -3.520241 | 2.960994  | 1.345875  |
| C | -0.342942 | -0.200862 | -1.684542 |
| C | 0.178595  | -0.996804 | -2.699223 |
| C | 0.614324  | 0.590129  | -1.048557 |
| C | 1.500690  | -1.008111 | -3.116034 |
| C | 1.958520  | 0.618809  | -1.422499 |
| C | 2.408596  | -0.182384 | -2.462873 |
| C | -3.027181 | -0.186413 | -2.455241 |
| C | -4.376371 | -0.432585 | -2.196797 |
| C | -2.795660 | 0.381829  | -3.709182 |
| C | -5.421076 | -0.169365 | -3.069179 |
| C | -3.809616 | 0.665435  | -4.630135 |
| C | -5.132709 | 0.388566  | -4.310951 |
| C | -1.911078 | -1.904280 | -0.579271 |

|    |            |           |           |
|----|------------|-----------|-----------|
| C  | -2.410889  | -3.053568 | -1.174668 |
| C  | -1.184538  | -2.147173 | 0.589998  |
| C  | -2.249011  | -4.341766 | -0.673500 |
| C  | -0.989666  | -3.409632 | 1.135952  |
| C  | -1.531796  | -4.521967 | 0.498984  |
| F  | -3.426859  | -0.626264 | 1.459386  |
| F  | -4.396233  | 1.369332  | 2.849453  |
| F  | -4.022961  | 3.960868  | 2.051276  |
| F  | -2.652670  | 4.454081  | -0.249577 |
| F  | -1.687049  | 2.447339  | -1.700537 |
| F  | -1.560602  | 0.688600  | -4.113699 |
| F  | -3.511524  | 1.191317  | -5.807274 |
| F  | -6.099634  | 0.644732  | -5.171659 |
| F  | -6.670931  | -0.442578 | -2.733375 |
| F  | -4.734036  | -0.959239 | -1.006826 |
| F  | 0.296277   | 1.374179  | -0.019146 |
| F  | 2.813240   | 1.402707  | -0.780162 |
| F  | 3.680932   | -0.164252 | -2.825862 |
| F  | 1.897550   | -1.791723 | -4.109567 |
| F  | -0.643269  | -1.848025 | -3.368254 |
| F  | -3.100957  | -2.985919 | -2.339796 |
| F  | -2.785078  | -5.381998 | -1.299373 |
| F  | -1.388637  | -5.729455 | 1.020506  |
| F  | -0.309265  | -3.563256 | 2.262335  |
| F  | -0.629426  | -1.124779 | 1.243064  |
| Na | -2.487425  | -2.399091 | -4.486313 |
| B  | -7.238420  | -5.376455 | -1.199321 |
| C  | -8.534849  | -6.395900 | -1.294967 |
| C  | -9.475204  | -6.368390 | -0.263893 |
| C  | -8.870342  | -7.226460 | -2.361024 |
| C  | -10.641465 | -7.122773 | -0.250591 |
| C  | -10.028849 | -8.002893 | -2.391901 |
| C  | -10.922153 | -7.951345 | -1.331389 |
| C  | -6.096937  | -5.616077 | -2.373608 |
| C  | -5.549570  | -4.649029 | -3.211470 |
| C  | -5.510474  | -6.878332 | -2.495181 |
| C  | -4.549010  | -4.933794 | -4.134530 |
| C  | -4.496572  | -7.193920 | -3.392470 |
| C  | -3.998811  | -6.199541 | -4.225650 |
| C  | -6.370663  | -5.602764 | 0.193770  |
| C  | -6.420828  | -6.703248 | 1.050755  |
| C  | -5.416787  | -4.664749 | 0.559091  |
| C  | -5.634075  | -6.822573 | 2.199141  |
| C  | -4.665364  | -4.700872 | 1.722338  |
| C  | -4.752956  | -5.808760 | 2.552788  |
| C  | -7.964478  | -3.882235 | -1.315208 |
| C  | -8.642550  | -3.582119 | -2.501619 |
| C  | -8.089834  | -2.891581 | -0.348724 |
| C  | -9.348888  | -2.407687 | -2.731186 |
| C  | -8.771565  | -1.690697 | -0.531406 |
| C  | -9.416346  | -1.443245 | -1.731929 |
| F  | -9.263865  | -5.587541 | 0.803605  |
| F  | -11.486310 | -7.056253 | 0.772877  |
| F  | -12.028953 | -8.681439 | -1.347639 |
| F  | -10.288984 | -8.782098 | -3.436621 |
| F  | -8.091848  | -7.322413 | -3.441952 |
| F  | -5.228365  | -3.565228 | -0.211207 |
| F  | -3.911148  | -3.646641 | 2.058885  |

|    |            |           |           |
|----|------------|-----------|-----------|
| F  | -4.032177  | -5.886747 | 3.657772  |
| F  | -5.737192  | -7.897365 | 2.968111  |
| F  | -7.245495  | -7.722729 | 0.824670  |
| F  | -5.933478  | -7.877723 | -1.719907 |
| F  | -3.993249  | -8.419833 | -3.448300 |
| F  | -3.017151  | -6.448179 | -5.078759 |
| F  | -4.062319  | -3.950038 | -4.921289 |
| F  | -5.943098  | -3.372070 | -3.177098 |
| F  | -8.606477  | -4.446125 | -3.519173 |
| F  | -9.944737  | -2.193341 | -3.896437 |
| F  | -10.061175 | -0.305047 | -1.932771 |
| F  | -8.766597  | -0.773569 | 0.433990  |
| F  | -7.506581  | -3.001809 | 0.872287  |
| Na | -5.479050  | -1.618416 | 1.087876  |

**Na[BAr<sup>F</sup><sub>20</sub>]<sup>-</sup>Na[BAr<sup>F</sup><sub>20</sub>]-b**

92

|   |            |            |           |
|---|------------|------------|-----------|
| B | -7.196140  | -4.991783  | -0.310357 |
| C | -6.235878  | -5.308202  | -1.629005 |
| C | -6.357508  | -4.745717  | -2.903082 |
| C | -5.277687  | -6.324855  | -1.538728 |
| C | -5.546060  | -5.103047  | -3.983465 |
| C | -4.445955  | -6.710112  | -2.585317 |
| C | -4.588099  | -6.096923  | -3.827697 |
| C | -8.070004  | -6.394433  | -0.197205 |
| C | -8.910952  | -6.742935  | -1.259861 |
| C | -7.932640  | -7.383825  | 0.776514  |
| C | -9.574425  | -7.959681  | -1.362386 |
| C | -8.580142  | -8.621485  | 0.716507  |
| C | -9.406569  | -8.912123  | -0.360998 |
| C | -8.135734  | -3.636740  | -0.500607 |
| C | -9.500774  | -3.523137  | -0.268919 |
| C | -7.528884  | -2.417054  | -0.787636 |
| C | -10.217632 | -2.331172  | -0.336794 |
| C | -8.181720  | -1.197540  | -0.879480 |
| C | -9.551849  | -1.152045  | -0.643535 |
| C | -6.344430  | -4.611070  | 1.070015  |
| C | -7.047482  | -4.354137  | 2.245290  |
| C | -4.985643  | -4.343642  | 1.194460  |
| C | -6.501054  | -3.878410  | 3.427035  |
| C | -4.372255  | -3.847985  | 2.342517  |
| C | -5.137267  | -3.608670  | 3.474356  |
| F | -7.252671  | -3.793527  | -3.162127 |
| F | -5.692590  | -4.504137  | -5.154243 |
| F | -3.828350  | -6.454942  | -4.843328 |
| F | -3.534974  | -7.652810  | -2.412823 |
| F | -5.107364  | -6.965322  | -0.382925 |
| F | -6.199821  | -2.380509  | -1.015589 |
| F | -7.517556  | -0.092478  | -1.179613 |
| F | -10.208157 | -0.007630  | -0.714681 |
| F | -11.519177 | -2.316183  | -0.090859 |
| F | -10.241783 | -4.603931  | 0.080284  |
| F | -7.157826  | -7.194588  | 1.849636  |
| F | -8.412012  | -9.513045  | 1.682021  |
| F | -10.030998 | -10.074019 | -0.431736 |
| F | -10.363795 | -8.217044  | -2.393072 |
| F | -9.107929  | -5.876185  | -2.252871 |
| F | -8.385672  | -4.576814  | 2.281135  |

|    |            |           |           |
|----|------------|-----------|-----------|
| F  | -7.260376  | -3.675043 | 4.491955  |
| F  | -4.583097  | -3.140238 | 4.577763  |
| F  | -3.075375  | -3.593902 | 2.350703  |
| F  | -4.139636  | -4.524175 | 0.153882  |
| Na | -10.160063 | -5.897981 | 1.985195  |
| B  | -1.856652  | -0.626473 | -2.160147 |
| C  | -0.320442  | -0.056347 | -1.962772 |
| C  | 0.676125   | -0.501973 | -2.832883 |
| C  | 0.136729   | 0.751214  | -0.924668 |
| C  | 2.017170   | -0.157954 | -2.723921 |
| C  | 1.473129   | 1.123007  | -0.774862 |
| C  | 2.421128   | 0.665328  | -1.678384 |
| C  | -2.966122  | 0.094874  | -1.154072 |
| C  | -3.835001  | -0.524807 | -0.266531 |
| C  | -3.186696  | 1.469864  | -1.277252 |
| C  | -4.848780  | 0.116352  | 0.438687  |
| C  | -4.175436  | 2.165877  | -0.591750 |
| C  | -5.025527  | 1.480383  | 0.271313  |
| C  | -1.652020  | -2.256184 | -1.871689 |
| C  | -1.723634  | -3.292264 | -2.805765 |
| C  | -1.239184  | -2.665778 | -0.597558 |
| C  | -1.470787  | -4.632673 | -2.497507 |
| C  | -0.973622  | -3.984586 | -0.246969 |
| C  | -1.108214  | -4.984531 | -1.205028 |
| C  | -2.491430  | -0.301279 | -3.661322 |
| C  | -3.725696  | -0.830536 | -4.024683 |
| C  | -1.970675  | 0.582746  | -4.606796 |
| C  | -4.396512  | -0.583998 | -5.212449 |
| C  | -2.600073  | 0.872590  | -5.818309 |
| C  | -3.820454  | 0.288385  | -6.128106 |
| F  | 0.350924   | -1.299445 | -3.857029 |
| F  | 2.910866   | -0.608115 | -3.597963 |
| F  | 3.695418   | 1.007497  | -1.547742 |
| F  | 1.845058   | 1.901952  | 0.235530  |
| F  | -0.691739  | 1.216250  | 0.013836  |
| F  | -1.103874  | -1.763431 | 0.372100  |
| F  | -0.613069  | -4.300269 | 0.986108  |
| F  | -0.887174  | -6.248736 | -0.891865 |
| F  | -1.579076  | -5.566337 | -3.432157 |
| F  | -2.072800  | -3.064392 | -4.075171 |
| F  | -2.413620  | 2.192976  | -2.090188 |
| F  | -4.323508  | 3.473228  | -0.760674 |
| F  | -5.988914  | 2.119747  | 0.916255  |
| F  | -5.652357  | -0.573464 | 1.241450  |
| F  | -3.771506  | -1.859576 | -0.052070 |
| F  | -4.363778  | -1.681924 | -3.179844 |
| F  | -5.564186  | -1.158232 | -5.469220 |
| F  | -4.426882  | 0.558875  | -7.273648 |
| F  | -2.041906  | 1.718879  | -6.674306 |
| F  | -0.823252  | 1.228575  | -4.400988 |
| Na | -4.253045  | -3.321666 | -1.736524 |

**Na[BAr<sup>F</sup><sub>20</sub>]<sup>-</sup>Na[BAr<sup>F</sup><sub>20</sub>]-d**

92

|   |           |           |           |
|---|-----------|-----------|-----------|
| B | -7.633124 | -4.864101 | -1.164920 |
| C | -7.146481 | -6.184928 | -2.033118 |
| C | -6.342406 | -7.227224 | -1.574688 |
| C | -7.684374 | -6.388541 | -3.305747 |

|    |            |           |           |
|----|------------|-----------|-----------|
| C  | -6.056804  | -8.365107 | -2.329535 |
| C  | -7.427900  | -7.503355 | -4.093547 |
| C  | -6.602750  | -8.506578 | -3.597357 |
| C  | -9.230260  | -5.235907 | -0.892724 |
| C  | -9.529238  | -6.336693 | -0.081227 |
| C  | -10.334653 | -4.696847 | -1.556728 |
| C  | -10.806790 | -6.857896 | 0.088419  |
| C  | -11.634956 | -5.193905 | -1.425130 |
| C  | -11.873263 | -6.282474 | -0.596604 |
| C  | -7.430321  | -3.430109 | -1.975187 |
| C  | -7.971127  | -2.256147 | -1.462811 |
| C  | -6.665328  | -3.214730 | -3.116197 |
| C  | -7.823762  | -0.990057 | -2.009685 |
| C  | -6.492498  | -1.973393 | -3.724662 |
| C  | -7.065659  | -0.841309 | -3.165167 |
| C  | -6.750981  | -4.617057 | 0.216731  |
| C  | -7.238787  | -4.368437 | 1.492150  |
| C  | -5.363853  | -4.514054 | 0.131147  |
| C  | -6.449203  | -4.075332 | 2.601315  |
| C  | -4.518065  | -4.256458 | 1.199695  |
| C  | -5.072128  | -4.020318 | 2.453636  |
| F  | -5.790208  | -7.198803 | -0.359515 |
| F  | -5.275233  | -9.318494 | -1.836781 |
| F  | -6.343274  | -9.582548 | -4.324849 |
| F  | -7.965599  | -7.621632 | -5.301450 |
| F  | -8.495469  | -5.465924 | -3.836239 |
| F  | -5.952761  | -4.212654 | -3.686318 |
| F  | -5.711004  | -1.872538 | -4.796286 |
| F  | -6.883586  | 0.347712  | -3.705415 |
| F  | -8.373952  | 0.064826  | -1.432163 |
| F  | -8.707072  | -2.307205 | -0.327011 |
| F  | -10.210918 | -3.646446 | -2.372928 |
| F  | -12.637431 | -4.628088 | -2.080267 |
| F  | -13.096367 | -6.760137 | -0.452530 |
| F  | -11.015729 | -7.893969 | 0.885217  |
| F  | -8.549885  | -6.950035 | 0.581191  |
| F  | -8.571450  | -4.377007 | 1.744857  |
| F  | -7.004808  | -3.829577 | 3.776995  |
| F  | -4.293222  | -3.721162 | 3.479188  |
| F  | -3.206491  | -4.181024 | 1.040346  |
| F  | -4.766377  | -4.684168 | -1.069660 |
| Na | -10.332028 | -3.203361 | 0.938738  |
| B  | -1.437258  | -0.833139 | -1.243820 |
| C  | -0.651376  | 0.619799  | -1.342401 |
| C  | 0.455807   | 0.723756  | -2.187055 |
| C  | -1.051130  | 1.823199  | -0.766064 |
| C  | 1.146914   | 1.904402  | -2.426511 |
| C  | -0.388782  | 3.032819  | -0.977546 |
| C  | 0.717319   | 3.076275  | -1.813392 |
| C  | -2.041477  | -0.959977 | -2.791653 |
| C  | -1.569065  | -1.793503 | -3.806582 |
| C  | -2.965344  | -0.001256 | -3.227600 |
| C  | -1.979307  | -1.702787 | -5.140440 |
| C  | -3.390431  | 0.136524  | -4.542474 |
| C  | -2.893640  | -0.728783 | -5.512301 |
| C  | -2.604580  | -0.859592 | -0.065682 |
| C  | -2.230148  | -0.600660 | 1.255696  |
| C  | -3.947528  | -1.180900 | -0.211359 |

|    |           |           |           |
|----|-----------|-----------|-----------|
| C  | -3.106773 | -0.606154 | 2.334422  |
| C  | -4.875197 | -1.164338 | 0.825837  |
| C  | -4.448915 | -0.891509 | 2.115753  |
| C  | -0.440134 | -2.077956 | -0.794133 |
| C  | -0.902455 | -3.386746 | -0.856559 |
| C  | 0.815170  | -1.960174 | -0.196460 |
| C  | -0.221935 | -4.509051 | -0.410635 |
| C  | 1.548687  | -3.052112 | 0.269474  |
| C  | 1.030306  | -4.336022 | 0.166552  |
| F  | 0.914032  | -0.365059 | -2.815383 |
| F  | 2.201078  | 1.925921  | -3.234784 |
| F  | 1.356234  | 4.218403  | -2.025992 |
| F  | -0.818886 | 4.145521  | -0.391877 |
| F  | -2.121043 | 1.895370  | 0.030763  |
| F  | -4.453362 | -1.554398 | -1.414153 |
| F  | -6.153152 | -1.457113 | 0.608010  |
| F  | -5.311256 | -0.921990 | 3.121020  |
| F  | -2.676641 | -0.346439 | 3.560375  |
| F  | -0.963624 | -0.288830 | 1.534479  |
| F  | -3.482179 | 0.863468  | -2.352835 |
| F  | -4.267934 | 1.069016  | -4.878868 |
| F  | -3.303536 | -0.634390 | -6.765574 |
| F  | -1.498885 | -2.543271 | -6.046718 |
| F  | -0.671173 | -2.752392 | -3.558455 |
| F  | -2.120267 | -3.632279 | -1.397783 |
| F  | -0.751397 | -5.720044 | -0.525708 |
| F  | 1.716849  | -5.377970 | 0.610006  |
| F  | 2.740156  | -2.868399 | 0.824224  |
| F  | 1.395197  | -0.773563 | -0.018894 |
| Na | -3.808361 | -3.378088 | -2.757499 |

**Na[BAr<sup>F</sup><sub>20</sub>]<sup>-</sup>Na[BAr<sup>F</sup><sub>20</sub>]-g**

92

|   |            |           |           |
|---|------------|-----------|-----------|
| B | -7.313834  | -5.290490 | -1.379895 |
| C | -7.839892  | -5.203598 | -2.946051 |
| C | -7.225355  | -5.772969 | -4.060293 |
| C | -9.093041  | -4.643928 | -3.204422 |
| C | -7.781324  | -5.752353 | -5.339461 |
| C | -9.685230  | -4.598345 | -4.460391 |
| C | -9.020427  | -5.162556 | -5.543363 |
| C | -8.340121  | -6.418730 | -0.738550 |
| C | -8.233785  | -7.743979 | -1.166035 |
| C | -9.426804  | -6.170614 | 0.098164  |
| C | -9.096292  | -8.761861 | -0.778212 |
| C | -10.319475 | -7.159233 | 0.512589  |
| C | -10.155862 | -8.464490 | 0.071685  |
| C | -7.363415  | -3.834806 | -0.581823 |
| C | -7.196220  | -3.784109 | 0.798351  |
| C | -7.454023  | -2.572593 | -1.157265 |
| C | -7.154412  | -2.628060 | 1.563694  |
| C | -7.430064  | -1.375904 | -0.443310 |
| C | -7.265754  | -1.394298 | 0.933626  |
| C | -5.711994  | -5.709572 | -1.248549 |
| C | -5.177897  | -6.648162 | -0.373737 |
| C | -4.739135  | -5.028522 | -1.977666 |
| C | -3.819500  | -6.936887 | -0.260369 |
| C | -3.375382  | -5.287244 | -1.925837 |
| C | -2.902725  | -6.247529 | -1.038220 |

|    |            |            |           |
|----|------------|------------|-----------|
| F  | -6.042318  | -6.386746  | -3.967559 |
| F  | -7.135311  | -6.303270  | -6.360740 |
| F  | -9.563005  | -5.136622  | -6.751909 |
| F  | -10.874720 | -4.033830  | -4.632188 |
| F  | -9.793308  | -4.098536  | -2.203667 |
| F  | -7.496280  | -2.412677  | -2.500186 |
| F  | -7.480672  | -0.219479  | -1.099387 |
| F  | -7.198585  | -0.273662  | 1.625135  |
| F  | -6.964387  | -2.694751  | 2.873497  |
| F  | -7.036703  | -4.937259  | 1.489864  |
| F  | -9.684587  | -4.944347  | 0.562313  |
| F  | -11.329325 | -6.856034  | 1.320557  |
| F  | -10.996136 | -9.414827  | 0.454760  |
| F  | -8.923903  | -10.003764 | -1.214998 |
| F  | -7.245418  | -8.094044  | -1.996172 |
| F  | -5.956181  | -7.312596  | 0.508989  |
| F  | -3.405684  | -7.806545  | 0.656742  |
| F  | -1.606693  | -6.471192  | -0.917902 |
| F  | -2.514691  | -4.606715  | -2.663913 |
| F  | -5.117385  | -4.036534  | -2.813339 |
| Na | -5.201291  | -5.961506  | 2.533830  |
| B  | -1.846134  | -0.408800  | -1.166000 |
| C  | -1.005110  | 0.786471   | -0.388308 |
| C  | -0.647571  | 1.927420   | -1.110064 |
| C  | -0.717217  | 0.853636   | 0.972976  |
| C  | -0.023827  | 3.037963   | -0.556292 |
| C  | -0.092332  | 1.947028   | 1.573106  |
| C  | 0.256098   | 3.048808   | 0.805720  |
| C  | -3.285711  | 0.381209   | -1.458290 |
| C  | -3.714843  | 0.900962   | -2.681129 |
| C  | -4.053971  | 0.800019   | -0.363925 |
| C  | -4.810319  | 1.758580   | -2.819810 |
| C  | -5.137416  | 1.664635   | -0.450544 |
| C  | -5.522460  | 2.150415   | -1.696191 |
| C  | -2.007296  | -1.782019  | -0.247167 |
| C  | -0.855707  | -2.412418  | 0.234748  |
| C  | -3.186591  | -2.433058  | 0.090017  |
| C  | -0.854938  | -3.544312  | 1.044694  |
| C  | -3.236117  | -3.540847  | 0.926753  |
| C  | -2.070483  | -4.111678  | 1.403084  |
| C  | -1.079321  | -0.960366  | -2.524493 |
| C  | -1.760314  | -1.784510  | -3.411063 |
| C  | 0.270597   | -0.798458  | -2.838032 |
| C  | -1.217613  | -2.390500  | -4.533314 |
| C  | 0.873841   | -1.384939  | -3.951137 |
| C  | 0.129965   | -2.187800  | -4.805791 |
| F  | -0.899992  | 1.987767   | -2.422231 |
| F  | 0.297970   | 4.084186   | -1.308542 |
| F  | 0.846346   | 4.097445   | 1.361526  |
| F  | 0.159554   | 1.943437   | 2.877801  |
| F  | -1.037326  | -0.142323  | 1.805113  |
| F  | -4.383859  | -2.016523  | -0.381750 |
| F  | -4.409958  | -4.095416  | 1.272398  |
| F  | -2.137385  | -5.182584  | 2.188215  |
| F  | 0.278714   | -4.070501  | 1.477395  |
| F  | 0.340267   | -1.896857  | -0.040412 |
| F  | -3.738852  | 0.380269   | 0.863730  |
| F  | -5.806120  | 2.027028   | 0.632497  |

|    |           |           |           |
|----|-----------|-----------|-----------|
| F  | -6.564244 | 2.955928  | -1.807435 |
| F  | -5.166536 | 2.198832  | -4.018397 |
| F  | -3.084807 | 0.607744  | -3.822895 |
| F  | -3.074679 | -2.036529 | -3.197815 |
| F  | -1.960096 | -3.150815 | -5.326731 |
| F  | 0.694397  | -2.750217 | -5.863242 |
| F  | 2.163101  | -1.186823 | -4.193791 |
| F  | 1.080970  | -0.067067 | -2.073941 |
| Na | -5.151328 | -1.676152 | -2.626933 |

**TS'**

49

|    |            |           |           |
|----|------------|-----------|-----------|
| C  | -14.195078 | -6.022278 | 6.490335  |
| C  | -15.431259 | -5.380948 | 6.506613  |
| C  | -15.538671 | -4.063180 | 6.971810  |
| C  | -14.386795 | -3.397798 | 7.411826  |
| C  | -13.150008 | -4.036584 | 7.384361  |
| C  | -13.050788 | -5.352441 | 6.929120  |
| H  | -14.123051 | -7.050908 | 6.129382  |
| H  | -16.325366 | -5.905062 | 6.159963  |
| H  | -14.466043 | -2.370043 | 7.774364  |
| H  | -12.258386 | -3.507003 | 7.727925  |
| H  | -12.081241 | -5.855731 | 6.912759  |
| C  | -16.849916 | -3.392043 | 7.026894  |
| H  | -17.735531 | -3.865940 | 6.616388  |
| H  | -16.942123 | -2.399145 | 7.454438  |
| Cl | -16.711126 | -2.285533 | 4.933788  |
| P  | -17.508561 | -4.352621 | 9.183739  |
| C  | -17.975661 | -6.101696 | 8.963432  |
| C  | -18.810331 | -6.404828 | 7.876497  |
| C  | -17.541194 | -7.134799 | 9.802280  |
| C  | -19.205003 | -7.718698 | 7.636356  |
| H  | -19.161836 | -5.609129 | 7.213769  |
| C  | -17.933350 | -8.450498 | 9.554275  |
| H  | -16.897170 | -6.918438 | 10.656969 |
| C  | -18.763192 | -8.744805 | 8.473210  |
| H  | -19.856592 | -7.942462 | 6.788800  |
| H  | -17.588871 | -9.249377 | 10.214881 |
| H  | -19.067524 | -9.776351 | 8.281651  |
| C  | -18.987562 | -3.544325 | 9.878653  |
| C  | -19.967284 | -4.250141 | 10.589857 |
| C  | -19.133248 | -2.163195 | 9.688667  |
| C  | -21.073941 | -3.579521 | 11.107160 |
| H  | -19.866341 | -5.327484 | 10.741857 |
| C  | -20.238763 | -1.494919 | 10.213522 |
| H  | -18.378076 | -1.602885 | 9.131208  |
| C  | -21.210137 | -2.202845 | 10.921053 |
| H  | -21.834407 | -4.135743 | 11.659955 |
| H  | -20.343832 | -0.418346 | 10.062141 |
| H  | -22.079490 | -1.680468 | 11.327128 |
| C  | -16.247602 | -4.307892 | 10.497509 |
| C  | -16.423574 | -3.570455 | 11.675680 |
| C  | -15.027442 | -4.968133 | 10.277255 |
| C  | -15.398209 | -3.499315 | 12.618580 |
| H  | -17.364563 | -3.049235 | 11.865129 |
| C  | -14.009624 | -4.898663 | 11.225216 |
| H  | -14.871380 | -5.546980 | 9.363376  |
| C  | -14.191528 | -4.162042 | 12.396548 |



|   |            |           |           |
|---|------------|-----------|-----------|
| H | -15.547826 | -2.923538 | 13.534764 |
| H | -13.067083 | -5.419654 | 11.042433 |
| H | -13.390677 | -4.104513 | 13.137397 |

**[Bn-PPh<sub>3</sub>]<sup>+</sup>·Cl<sup>-</sup>**

49

|    |            |            |           |
|----|------------|------------|-----------|
| C  | -4.683508  | -5.708791  | 3.582854  |
| C  | -5.980791  | -5.595325  | 4.081880  |
| C  | -6.426406  | -4.386763  | 4.631976  |
| C  | -5.555890  | -3.288807  | 4.664230  |
| C  | -4.260937  | -3.403675  | 4.160761  |
| C  | -3.818865  | -4.614024  | 3.625278  |
| H  | -4.347784  | -6.657095  | 3.156326  |
| H  | -6.652723  | -6.456246  | 4.043689  |
| H  | -5.919862  | -2.345489  | 5.085785  |
| H  | -3.591758  | -2.540340  | 4.189698  |
| H  | -2.802257  | -4.703627  | 3.234660  |
| C  | -7.805438  | -4.249342  | 5.227072  |
| H  | -8.570327  | -4.815944  | 4.675081  |
| H  | -8.098857  | -3.178535  | 5.262967  |
| Cl | -8.028829  | -0.892017  | 5.839207  |
| P  | -7.883638  | -4.804153  | 6.960698  |
| C  | -7.648659  | -6.595340  | 7.063269  |
| C  | -8.275092  | -7.417493  | 6.115408  |
| C  | -6.940936  | -7.169695  | 8.125973  |
| C  | -8.170958  | -8.801538  | 6.220387  |
| H  | -8.851838  | -6.986579  | 5.293985  |
| C  | -6.841642  | -8.556559  | 8.224318  |
| H  | -6.468216  | -6.541555  | 8.883225  |
| C  | -7.451541  | -9.371330  | 7.271830  |
| H  | -8.656313  | -9.437669  | 5.477506  |
| H  | -6.285449  | -8.999980  | 9.052648  |
| H  | -7.370177  | -10.457690 | 7.350842  |
| C  | -9.520162  | -4.433512  | 7.636743  |
| C  | -10.189540 | -5.396865  | 8.405038  |
| C  | -10.109383 | -3.182762  | 7.398108  |
| C  | -11.447933 | -5.110679  | 8.928702  |
| H  | -9.737989  | -6.372565  | 8.595215  |
| C  | -11.369563 | -2.911517  | 7.928788  |
| H  | -9.576649  | -2.406322  | 6.827564  |
| C  | -12.039277 | -3.870151  | 8.688814  |
| H  | -11.968165 | -5.863303  | 9.524784  |
| H  | -11.828062 | -1.937274  | 7.745266  |
| H  | -13.027644 | -3.649484  | 9.098747  |
| C  | -6.587165  | -3.972982  | 7.903096  |
| C  | -6.894974  | -2.885144  | 8.726763  |
| C  | -5.251675  | -4.368997  | 7.729637  |
| C  | -5.871389  | -2.206674  | 9.385099  |
| H  | -7.927072  | -2.557439  | 8.855370  |
| C  | -4.236379  | -3.683835  | 8.389801  |
| H  | -4.997153  | -5.209694  | 7.080422  |
| C  | -4.545961  | -2.603540  | 9.217156  |
| H  | -6.114814  | -1.357823  | 10.026992 |
| H  | -3.198595  | -3.993835  | 8.252254  |
| H  | -3.746734  | -2.066108  | 9.732606  |

**Na[BAr<sup>F</sup><sub>20</sub>]<sup>-</sup>·BnCl·PPh<sub>3</sub>**

95

|    |            |           |           |
|----|------------|-----------|-----------|
| C  | -15.114329 | -7.192293 | 6.974864  |
| C  | -15.867508 | -6.386410 | 6.119585  |
| C  | -15.270171 | -5.309259 | 5.458086  |
| C  | -13.907984 | -5.055102 | 5.655287  |
| C  | -13.151517 | -5.868378 | 6.493292  |
| C  | -13.755592 | -6.937965 | 7.158777  |
| H  | -15.594162 | -8.022145 | 7.498504  |
| H  | -16.931916 | -6.588193 | 5.976908  |
| H  | -13.438130 | -4.205156 | 5.157327  |
| H  | -12.091524 | -5.652624 | 6.643366  |
| H  | -13.165870 | -7.570115 | 7.826703  |
| C  | -16.093278 | -4.394573 | 4.608900  |
| H  | -17.155284 | -4.660507 | 4.603499  |
| H  | -15.981529 | -3.350835 | 4.914043  |
| Cl | -15.583934 | -4.448146 | 2.837450  |
| P  | -17.288241 | -3.044250 | 7.809616  |
| C  | -17.934179 | -4.425229 | 8.840572  |
| C  | -18.810575 | -5.325909 | 8.220163  |
| C  | -17.604413 | -4.622915 | 10.188612 |
| C  | -19.351544 | -6.398289 | 8.929975  |
| H  | -19.072882 | -5.186888 | 7.167119  |
| C  | -18.137468 | -5.699212 | 10.896436 |
| H  | -16.924983 | -3.930682 | 10.691774 |
| C  | -19.011642 | -6.588674 | 10.269098 |
| H  | -20.034405 | -7.091139 | 8.432549  |
| H  | -17.870229 | -5.842836 | 11.946147 |
| H  | -19.427040 | -7.432332 | 10.825494 |
| C  | -18.398558 | -1.645251 | 8.260462  |
| C  | -19.408741 | -1.720916 | 9.227045  |
| C  | -18.229450 | -0.442667 | 7.557121  |
| C  | -20.221017 | -0.616228 | 9.489587  |
| H  | -19.568217 | -2.645926 | 9.785529  |
| C  | -19.024439 | 0.666790  | 7.834747  |
| H  | -17.448481 | -0.365084 | 6.799862  |
| C  | -20.028009 | 0.580750  | 8.800719  |
| H  | -21.006395 | -0.692479 | 10.245574 |
| H  | -18.854276 | 1.601149  | 7.296008  |
| H  | -20.658903 | 1.446399  | 9.016059  |
| C  | -15.722015 | -2.615052 | 8.684498  |
| C  | -15.432087 | -1.347959 | 9.203411  |
| C  | -14.742321 | -3.617134 | 8.768161  |
| C  | -14.200417 | -1.095928 | 9.810246  |
| H  | -16.165891 | -0.542307 | 9.140482  |
| C  | -13.518595 | -3.368087 | 9.384032  |
| H  | -14.944612 | -4.611705 | 8.361217  |
| C  | -13.244883 | -2.104963 | 9.911365  |
| H  | -13.986185 | -0.097732 | 10.199041 |
| H  | -12.771167 | -4.162865 | 9.443594  |
| H  | -12.280946 | -1.902758 | 10.382683 |
| B  | -13.786898 | 1.132308  | 4.427850  |
| C  | -14.387622 | 2.556941  | 5.015448  |
| C  | -14.190225 | 3.822534  | 4.467359  |
| C  | -15.305104 | 2.521471  | 6.067510  |
| C  | -14.822336 | 4.972109  | 4.942972  |
| C  | -15.956936 | 3.637714  | 6.574157  |
| C  | -15.715138 | 4.881246  | 6.000851  |
| C  | -12.547169 | 1.325620  | 3.344494  |
| C  | -11.417676 | 2.049198  | 3.737165  |

|    |            |           |          |
|----|------------|-----------|----------|
| C  | -12.413313 | 0.715369  | 2.104727 |
| C  | -10.273179 | 2.189720  | 2.962070 |
| C  | -11.289391 | 0.813952  | 1.288626 |
| C  | -10.204786 | 1.561944  | 1.722148 |
| C  | -15.164960 | 0.479388  | 3.768998 |
| C  | -15.955997 | -0.513139 | 4.348451 |
| C  | -15.749561 | 1.108663  | 2.664213 |
| C  | -17.223395 | -0.867389 | 3.875306 |
| C  | -16.999562 | 0.781711  | 2.151050 |
| C  | -17.747608 | -0.217622 | 2.765841 |
| C  | -13.050523 | 0.186672  | 5.575112 |
| C  | -12.615148 | -1.092277 | 5.240462 |
| C  | -12.610847 | 0.613507  | 6.828525 |
| C  | -11.803048 | -1.896431 | 6.025702 |
| C  | -11.805289 | -0.159212 | 7.664827 |
| C  | -11.402080 | -1.425574 | 7.269075 |
| F  | -13.374127 | 4.013438  | 3.428091 |
| F  | -14.584987 | 6.151385  | 4.378929 |
| F  | -16.328067 | 5.963189  | 6.459959 |
| F  | -16.815131 | 3.527047  | 7.583328 |
| F  | -15.593962 | 1.353825  | 6.654022 |
| F  | -15.103749 | 2.098672  | 2.049497 |
| F  | -17.483458 | 1.412108  | 1.091823 |
| F  | -18.939178 | -0.546478 | 2.298785 |
| F  | -17.934216 | -1.810603 | 4.476541 |
| F  | -15.535499 | -1.176102 | 5.432605 |
| F  | -13.403008 | -0.065433 | 1.596164 |
| F  | -11.247639 | 0.190626  | 0.117852 |
| F  | -9.120570  | 1.675162  | 0.970546 |
| F  | -9.244421  | 2.904918  | 3.396689 |
| F  | -11.403683 | 2.660929  | 4.923186 |
| F  | -12.955917 | -1.621870 | 4.035121 |
| F  | -11.404491 | -3.091196 | 5.603164 |
| F  | -10.640829 | -2.171102 | 8.054824 |
| F  | -11.428509 | 0.310195  | 8.847142 |
| F  | -12.912849 | 1.822736  | 7.299927 |
| Na | -14.365298 | -1.991067 | 2.318950 |

### TS<sup>M</sup>

95

|    |            |           |           |
|----|------------|-----------|-----------|
| C  | -17.196254 | -6.751132 | -3.159799 |
| C  | -17.775402 | -5.675457 | -3.823557 |
| C  | -17.001494 | -4.550136 | -4.150743 |
| C  | -15.640143 | -4.521957 | -3.806370 |
| C  | -15.063973 | -5.600212 | -3.145013 |
| C  | -15.841619 | -6.714103 | -2.820667 |
| H  | -17.801067 | -7.623865 | -2.904879 |
| H  | -18.832983 | -5.699019 | -4.095069 |
| H  | -15.040823 | -3.645524 | -4.061870 |
| H  | -14.006217 | -5.572596 | -2.875721 |
| H  | -15.388620 | -7.559510 | -2.297638 |
| C  | -17.599152 | -3.420645 | -4.838738 |
| H  | -18.654017 | -3.407522 | -5.091217 |
| H  | -17.020781 | -2.519182 | -5.019478 |
| Cl | -17.232407 | -4.104093 | -7.112942 |
| P  | -18.372427 | -2.265427 | -2.528142 |
| C  | -19.939123 | -3.051159 | -1.986174 |
| C  | -20.726812 | -3.734703 | -2.918068 |

|   |            |           |            |
|---|------------|-----------|------------|
| C | -20.393280 | -2.929259 | -0.663883  |
| C | -21.943119 | -4.303120 | -2.533761  |
| H | -20.403879 | -3.818178 | -3.957271  |
| C | -21.603209 | -3.500292 | -0.280721  |
| H | -19.795592 | -2.382540 | 0.070454   |
| C | -22.379164 | -4.190569 | -1.215748  |
| H | -22.550433 | -4.832003 | -3.271671  |
| H | -21.946801 | -3.402228 | 0.751564   |
| H | -23.330243 | -4.635563 | -0.913969  |
| C | -18.685920 | -0.513002 | -2.074781  |
| C | -19.589808 | 0.189519  | -2.884084  |
| C | -18.138106 | 0.123098  | -0.953448  |
| C | -19.954428 | 1.496809  | -2.568740  |
| H | -20.019245 | -0.288703 | -3.766355  |
| C | -18.497291 | 1.435235  | -0.647256  |
| H | -17.435968 | -0.403034 | -0.304336  |
| C | -19.409542 | 2.121311  | -1.447759  |
| H | -20.656124 | 2.029269  | -3.213100  |
| H | -18.060401 | 1.922295  | 0.227428   |
| H | -19.685474 | 3.149989  | -1.206159  |
| C | -17.099196 | -2.866001 | -1.366808  |
| C | -17.263106 | -4.034745 | -0.613520  |
| C | -15.851336 | -2.222798 | -1.357541  |
| C | -16.207383 | -4.536691 | 0.147757   |
| H | -18.215239 | -4.568544 | -0.621009  |
| C | -14.803528 | -2.718319 | -0.586282  |
| H | -15.691687 | -1.325414 | -1.958025  |
| C | -14.978543 | -3.879297 | 0.168084   |
| H | -16.350208 | -5.451725 | 0.727142   |
| H | -13.842935 | -2.198362 | -0.583369  |
| H | -14.154819 | -4.273518 | 0.767626   |
| B | -18.244712 | 1.527469  | -7.446093  |
| C | -19.496496 | 2.604531  | -7.501006  |
| C | -20.550580 | 2.451020  | -6.600272  |
| C | -19.684525 | 3.618196  | -8.437748  |
| C | -21.676566 | 3.262134  | -6.565447  |
| C | -20.803205 | 4.452246  | -8.449708  |
| C | -21.806669 | 4.276596  | -7.507187  |
| C | -17.526705 | 1.430159  | -5.952171  |
| C | -17.621889 | 2.369750  | -4.925552  |
| C | -16.605964 | 0.419008  | -5.695958  |
| C | -16.868444 | 2.308567  | -3.752657  |
| C | -15.859497 | 0.288485  | -4.534801  |
| C | -15.997394 | 1.250335  | -3.541170  |
| C | -16.956578 | 1.962551  | -8.397972  |
| C | -16.284051 | 1.178101  | -9.325289  |
| C | -16.355711 | 3.207086  | -8.183173  |
| C | -15.134297 | 1.564092  | -10.009974 |
| C | -15.215442 | 3.649444  | -8.842317  |
| C | -14.591952 | 2.816657  | -9.766084  |
| C | -19.007537 | 0.125290  | -7.912015  |
| C | -19.496641 | 0.019749  | -9.218900  |
| C | -19.410060 | -0.911090 | -7.068932  |
| C | -20.278126 | -1.036100 | -9.675632  |
| C | -20.209686 | -1.979914 | -7.475772  |
| C | -20.638166 | -2.051489 | -8.793373  |
| F | -20.497798 | 1.478951  | -5.681862  |
| F | -22.621752 | 3.073144  | -5.650135  |

|    |            |           |            |
|----|------------|-----------|------------|
| F  | -22.873609 | 5.063322  | -7.504792  |
| F  | -20.917418 | 5.409283  | -9.364272  |
| F  | -18.788010 | 3.854235  | -9.398703  |
| F  | -16.889375 | 4.057011  | -7.303347  |
| F  | -14.712542 | 4.851067  | -8.592632  |
| F  | -13.499285 | 3.213647  | -10.399795 |
| F  | -14.555979 | 0.741019  | -10.875364 |
| F  | -16.710759 | -0.075317 | -9.625266  |
| F  | -16.379697 | -0.532489 | -6.634717  |
| F  | -15.024956 | -0.734045 | -4.370732  |
| F  | -15.297195 | 1.163861  | -2.419040  |
| F  | -16.978056 | 3.262792  | -2.838794  |
| F  | -18.442064 | 3.416297  | -5.012174  |
| F  | -19.219011 | 0.975187  | -10.105895 |
| F  | -20.685149 | -1.082722 | -10.935731 |
| F  | -21.380456 | -3.064446 | -9.205632  |
| F  | -20.552883 | -2.927963 | -6.612999  |
| F  | -19.044762 | -0.938355 | -5.784538  |
| Na | -16.941191 | -1.914834 | -8.364293  |

### TS<sup>M</sup>-a

95

|    |            |           |           |
|----|------------|-----------|-----------|
| C  | -15.052557 | -7.330460 | 6.642499  |
| C  | -15.935317 | -6.361958 | 6.176610  |
| C  | -15.477137 | -5.060709 | 5.915030  |
| C  | -14.120949 | -4.755097 | 6.106991  |
| C  | -13.236181 | -5.729034 | 6.554350  |
| C  | -13.703893 | -7.015228 | 6.830819  |
| H  | -15.413776 | -8.338756 | 6.855503  |
| H  | -16.987497 | -6.606745 | 6.017758  |
| H  | -13.769002 | -3.744287 | 5.899005  |
| H  | -12.183602 | -5.480245 | 6.701491  |
| H  | -13.012557 | -7.779761 | 7.192938  |
| C  | -16.382989 | -4.022897 | 5.451297  |
| H  | -17.438282 | -4.228724 | 5.288598  |
| H  | -16.049115 | -2.995374 | 5.423127  |
| Cl | -16.035720 | -4.073641 | 3.106479  |
| P  | -17.125375 | -3.214973 | 7.931502  |
| C  | -17.866134 | -4.628457 | 8.820071  |
| C  | -18.728354 | -5.456958 | 8.089553  |
| C  | -17.644441 | -4.898226 | 10.177193 |
| C  | -19.360716 | -6.537268 | 8.703606  |
| H  | -18.909251 | -5.255073 | 7.030221  |
| C  | -18.271105 | -5.983309 | 10.787515 |
| H  | -16.982595 | -4.257128 | 10.763829 |
| C  | -19.128765 | -6.803669 | 10.052743 |
| H  | -20.031543 | -7.175340 | 8.123963  |
| H  | -18.091487 | -6.186453 | 11.845729 |
| H  | -19.617942 | -7.653454 | 10.534548 |
| C  | -18.274752 | -1.822718 | 8.257848  |
| C  | -19.387582 | -1.940412 | 9.100860  |
| C  | -18.039526 | -0.598953 | 7.612873  |
| C  | -20.235858 | -0.851046 | 9.301638  |
| H  | -19.598091 | -2.883187 | 9.609970  |
| C  | -18.874698 | 0.493698  | 7.832370  |
| H  | -17.185145 | -0.490575 | 6.945970  |
| C  | -19.979354 | 0.368293  | 8.675117  |
| H  | -21.100231 | -0.956928 | 9.961323  |

|   |            |           |           |
|---|------------|-----------|-----------|
| H | -18.653411 | 1.445291  | 7.344482  |
| H | -20.640831 | 1.221237  | 8.843584  |
| C | -15.596999 | -2.806810 | 8.854621  |
| C | -15.239133 | -1.491829 | 9.182236  |
| C | -14.696568 | -3.844838 | 9.144878  |
| C | -14.018561 | -1.224911 | 9.800155  |
| H | -15.910110 | -0.660012 | 8.963461  |
| C | -13.478957 | -3.573574 | 9.766093  |
| H | -14.949245 | -4.878335 | 8.895283  |
| C | -13.136752 | -2.262941 | 10.098382 |
| H | -13.755692 | -0.193912 | 10.045987 |
| H | -12.793111 | -4.394618 | 9.987227  |
| H | -12.179865 | -2.047602 | 10.577836 |
| B | -13.777220 | 1.244803  | 4.386576  |
| C | -14.344399 | 2.711212  | 4.899443  |
| C | -14.116518 | 3.944649  | 4.293530  |
| C | -15.274684 | 2.743974  | 5.940590  |
| C | -14.731504 | 5.127424  | 4.706610  |
| C | -15.914212 | 3.894005  | 6.382458  |
| C | -15.640029 | 5.104307  | 5.754882  |
| C | -12.547875 | 1.333055  | 3.281875  |
| C | -11.395064 | 2.052165  | 3.606379  |
| C | -12.449834 | 0.623107  | 2.091796  |
| C | -10.259292 | 2.104840  | 2.807633  |
| C | -11.336003 | 0.633308  | 1.256406  |
| C | -10.227248 | 1.384849  | 1.617453  |
| C | -15.174802 | 0.597563  | 3.769162  |
| C | -15.981425 | -0.343933 | 4.401803  |
| C | -15.752932 | 1.179789  | 2.636214  |
| C | -17.262842 | -0.691773 | 3.967692  |
| C | -17.013746 | 0.852168  | 2.151941  |
| C | -17.779938 | -0.093041 | 2.827497  |
| C | -13.057452 | 0.349601  | 5.585096  |
| C | -12.649111 | -0.953695 | 5.316264  |
| C | -12.611972 | 0.828855  | 6.817417  |
| C | -11.856348 | -1.734367 | 6.143849  |
| C | -11.826809 | 0.080555  | 7.695589  |
| C | -11.446048 | -1.210795 | 7.362764  |
| F | -13.288706 | 4.068670  | 3.253704  |
| F | -14.463805 | 6.273633  | 4.090565  |
| F | -16.238552 | 6.218139  | 6.152781  |
| F | -16.791220 | 3.845133  | 7.380638  |
| F | -15.594825 | 1.611188  | 6.579763  |
| F | -15.088767 | 2.119234  | 1.963753  |
| F | -17.493005 | 1.433498  | 1.062635  |
| F | -18.982520 | -0.419603 | 2.386813  |
| F | -17.989311 | -1.583053 | 4.626440  |
| F | -15.547058 | -0.972013 | 5.506766  |
| F | -13.462104 | -0.172753 | 1.663145  |
| F | -11.324809 | -0.078099 | 0.136067  |
| F | -9.152399  | 1.412670  | 0.844143  |
| F | -9.204887  | 2.821481  | 3.174008  |
| F | -11.346279 | 2.742121  | 4.748289  |
| F | -13.006788 | -1.537209 | 4.145146  |
| F | -11.493137 | -2.960497 | 5.785066  |
| F | -10.695620 | -1.929079 | 8.183224  |
| F | -11.448009 | 0.595945  | 8.858707  |
| F | -12.890074 | 2.066581  | 7.226340  |

Na -14.502776 -2.072314 2.517195

**TS<sup>M</sup>-b**

95

C -16.455953 -12.428685 12.347635  
C -16.723991 -11.136950 11.910399  
C -15.695987 -10.346412 11.370259  
C -14.401919 -10.880321 11.253052  
C -14.135594 -12.170509 11.697167  
C -15.160352 -12.942621 12.248970  
H -17.257388 -13.037584 12.771324  
H -17.731009 -10.724239 11.987072  
H -13.607603 -10.274243 10.813043  
H -13.125718 -12.577555 11.614976  
H -14.949180 -13.955851 12.598754  
C -15.976940 -8.991320 10.937531  
H -16.948820 -8.547568 11.127334  
H -15.193523 -8.365502 10.519918  
Cl -16.721814 -9.405071 8.669545  
P -15.409062 -7.852950 13.335864  
C -16.868041 -8.135263 14.403678  
C -17.664977 -7.056246 14.813060  
C -17.270257 -9.438485 14.737165  
C -18.818025 -7.274355 15.564384  
H -17.390552 -6.034990 14.546134  
C -18.421125 -9.651572 15.494304  
H -16.674649 -10.296158 14.420239  
C -19.192424 -8.569656 15.918092  
H -19.427780 -6.421878 15.872002  
H -18.717278 -10.671228 15.750289  
H -20.095802 -8.736845 16.508020  
C -14.955642 -6.114024 13.719154  
C -14.490639 -5.758138 14.994281  
C -15.125938 -5.119488 12.751335  
C -14.220619 -4.426296 15.296047  
H -14.348390 -6.525065 15.760080  
C -14.860668 -3.783360 13.057973  
H -15.473260 -5.384626 11.754531  
C -14.411850 -3.435463 14.329831  
H -13.863512 -4.158121 16.293026  
H -15.007957 -3.013583 12.296911  
H -14.207801 -2.389763 14.571563  
C -14.022191 -8.798184 14.067456  
C -12.846296 -8.836871 13.303159  
C -14.053652 -9.460597 15.299847  
C -11.725195 -9.525435 13.759402  
H -12.806616 -8.319901 12.339853  
C -12.933118 -10.159932 15.750175  
H -14.949273 -9.430352 15.922896  
C -11.769925 -10.196310 14.982347  
H -10.816053 -9.544388 13.154117  
H -12.970685 -10.674720 16.712998  
H -10.895150 -10.745398 15.338445  
B -20.358032 -5.614192 10.532672  
C -19.869785 -4.146017 11.116263  
C -19.834876 -3.041762 10.262727  
C -19.271630 -3.932000 12.356374  
C -19.269427 -1.816723 10.596168

|    |            |            |           |
|----|------------|------------|-----------|
| C  | -18.677504 | -2.727282  | 12.729688 |
| C  | -18.676632 | -1.659095  | 11.844607 |
| C  | -20.562949 | -6.754723  | 11.719674 |
| C  | -20.077022 | -8.053627  | 11.737376 |
| C  | -21.476821 | -6.486588  | 12.743663 |
| C  | -20.457562 | -9.029939  | 12.653715 |
| C  | -21.877821 | -7.415635  | 13.695357 |
| C  | -21.370603 | -8.708910  | 13.644248 |
| C  | -19.140642 | -5.898927  | 9.432518  |
| C  | -19.234283 | -5.742588  | 8.046771  |
| C  | -17.833010 | -6.054073  | 9.899431  |
| C  | -18.128876 | -5.746574  | 7.191267  |
| C  | -16.707019 | -6.046694  | 9.088356  |
| C  | -16.853891 | -5.896426  | 7.714854  |
| C  | -21.850028 | -5.640068  | 9.824316  |
| C  | -22.250073 | -6.783679  | 9.137838  |
| C  | -22.840999 | -4.668366  | 9.938714  |
| C  | -23.499794 | -6.974651  | 8.568970  |
| C  | -24.115717 | -4.809499  | 9.387868  |
| C  | -24.450562 | -5.967869  | 8.700155  |
| F  | -20.347569 | -3.138747  | 9.031467  |
| F  | -19.274083 | -0.806990  | 9.732957  |
| F  | -18.115332 | -0.505895  | 12.180616 |
| F  | -18.101861 | -2.604151  | 13.921470 |
| F  | -19.206936 | -4.900648  | 13.273565 |
| F  | -17.626544 | -6.208187  | 11.211292 |
| F  | -15.490919 | -6.201093  | 9.599944  |
| F  | -15.797131 | -5.919264  | 6.922736  |
| F  | -18.296078 | -5.609986  | 5.883583  |
| F  | -20.409789 | -5.566728  | 7.440316  |
| F  | -22.028480 | -5.274731  | 12.837203 |
| F  | -22.734162 | -7.081956  | 14.652382 |
| F  | -21.745224 | -9.615441  | 14.533946 |
| F  | -19.959559 | -10.260274 | 12.584861 |
| F  | -19.194425 | -8.477615  | 10.801094 |
| F  | -21.373012 | -7.807417  | 8.974298  |
| F  | -23.791743 | -8.091338  | 7.913716  |
| F  | -25.657644 | -6.113575  | 8.173851  |
| F  | -25.015611 | -3.843849  | 9.524838  |
| F  | -22.624109 | -3.530778  | 10.598570 |
| Na | -19.210398 | -8.674939  | 8.527995  |

### TS<sup>M</sup>-c

95

|   |            |           |           |
|---|------------|-----------|-----------|
| C | -13.979786 | -6.414727 | 0.390270  |
| C | -14.009840 | -5.065433 | 0.052027  |
| C | -12.824917 | -4.315680 | 0.019086  |
| C | -11.606059 | -4.947372 | 0.307450  |
| C | -11.577730 | -6.295195 | 0.649477  |
| C | -12.765080 | -7.029515 | 0.695646  |
| H | -14.906443 | -6.989603 | 0.417941  |
| H | -14.962358 | -4.584307 | -0.184391 |
| H | -10.678720 | -4.370825 | 0.264211  |
| H | -10.625899 | -6.778394 | 0.880243  |
| H | -12.743275 | -8.087312 | 0.966933  |
| C | -12.856962 | -2.892817 | -0.316073 |
| H | -13.799315 | -2.360196 | -0.391210 |
| H | -11.941302 | -2.306602 | -0.326944 |



|    |            |           |           |
|----|------------|-----------|-----------|
| Cl | -12.782269 | -3.018112 | -2.651118 |
| P  | -13.101868 | -2.005253 | 2.196605  |
| C  | -11.608079 | -1.562086 | 3.151898  |
| C  | -10.469947 | -2.365182 | 2.993865  |
| C  | -11.565272 | -0.476620 | 4.036496  |
| C  | -9.309414  | -2.092432 | 3.716373  |
| H  | -10.492688 | -3.215114 | 2.306983  |
| C  | -10.400298 | -0.201711 | 4.751483  |
| H  | -12.444726 | 0.157308  | 4.171457  |
| C  | -9.272758  | -1.008562 | 4.594072  |
| H  | -8.429065  | -2.726370 | 3.588832  |
| H  | -10.375587 | 0.647097  | 5.438752  |
| H  | -8.361742  | -0.790446 | 5.156288  |
| C  | -13.987794 | -3.207654 | 3.243484  |
| C  | -13.520272 | -3.643206 | 4.489575  |
| C  | -15.173102 | -3.751927 | 2.730746  |
| C  | -14.236860 | -4.599410 | 5.209149  |
| H  | -12.596896 | -3.234808 | 4.906247  |
| C  | -15.897534 | -4.691867 | 3.458415  |
| H  | -15.545244 | -3.420034 | 1.761350  |
| C  | -15.425465 | -5.122232 | 4.698384  |
| H  | -13.865260 | -4.932935 | 6.180793  |
| H  | -16.828812 | -5.089982 | 3.051451  |
| H  | -15.986203 | -5.866253 | 5.268801  |
| C  | -14.124476 | -0.488953 | 2.203147  |
| C  | -15.335183 | -0.370237 | 2.894163  |
| C  | -13.671031 | 0.588923  | 1.426598  |
| C  | -16.088321 | 0.800825  | 2.796694  |
| H  | -15.705630 | -1.193767 | 3.505358  |
| C  | -14.412128 | 1.764716  | 1.351080  |
| H  | -12.730172 | 0.509608  | 0.874669  |
| C  | -15.629628 | 1.868491  | 2.027324  |
| H  | -17.035878 | 0.875154  | 3.334699  |
| H  | -14.048474 | 2.596067  | 0.744150  |
| H  | -16.221898 | 2.783274  | 1.949284  |
| B  | -19.179141 | -2.184105 | -0.355601 |
| C  | -19.715270 | -1.754029 | 1.147520  |
| C  | -20.966879 | -1.245283 | 1.484931  |
| C  | -18.795047 | -1.756800 | 2.193963  |
| C  | -21.292326 | -0.804109 | 2.768474  |
| C  | -19.070705 | -1.332273 | 3.485942  |
| C  | -20.339054 | -0.842738 | 3.776514  |
| C  | -18.115337 | -0.957784 | -0.708284 |
| C  | -18.610906 | 0.346499  | -0.796310 |
| C  | -16.738100 | -1.033247 | -0.864418 |
| C  | -17.829630 | 1.466849  | -1.055797 |
| C  | -15.914720 | 0.047852  | -1.164034 |
| C  | -16.461631 | 1.317398  | -1.253838 |
| C  | -20.383420 | -2.330084 | -1.478818 |
| C  | -20.410164 | -1.754932 | -2.746837 |
| C  | -21.433986 | -3.213450 | -1.222908 |
| C  | -21.419223 | -1.997015 | -3.679400 |
| C  | -22.461077 | -3.483834 | -2.118202 |
| C  | -22.452666 | -2.867374 | -3.364810 |
| C  | -18.488397 | -3.695489 | -0.402054 |
| C  | -17.852706 | -4.118351 | -1.565362 |
| C  | -18.570399 | -4.689184 | 0.574322  |
| C  | -17.290681 | -5.370120 | -1.763113 |

|    |            |           |           |
|----|------------|-----------|-----------|
| C  | -18.034297 | -5.969956 | 0.420404  |
| C  | -17.390200 | -6.321653 | -0.757306 |
| F  | -21.942287 | -1.133762 | 0.581308  |
| F  | -22.506874 | -0.331138 | 3.028190  |
| F  | -20.632501 | -0.419959 | 4.998411  |
| F  | -18.138876 | -1.372221 | 4.434992  |
| F  | -17.555755 | -2.203491 | 1.965262  |
| F  | -21.490004 | -3.852444 | -0.049619 |
| F  | -23.438196 | -4.326473 | -1.801717 |
| F  | -23.417443 | -3.111487 | -4.240936 |
| F  | -21.388083 | -1.410685 | -4.871909 |
| F  | -19.441696 | -0.929790 | -3.159982 |
| F  | -16.076535 | -2.218473 | -0.783471 |
| F  | -14.616462 | -0.145912 | -1.382489 |
| F  | -15.699295 | 2.365826  | -1.521230 |
| F  | -18.377069 | 2.672754  | -1.126357 |
| F  | -19.920462 | 0.565849  | -0.664869 |
| F  | -17.693764 | -3.257151 | -2.601958 |
| F  | -16.620045 | -5.628650 | -2.888344 |
| F  | -16.869469 | -7.528970 | -0.910902 |
| F  | -18.126500 | -6.854612 | 1.404193  |
| F  | -19.179936 | -4.473780 | 1.738961  |
| Na | -15.321366 | -3.029618 | -3.004555 |

### TS<sup>M</sup>-d

95

|    |            |           |           |
|----|------------|-----------|-----------|
| C  | -11.484283 | -5.499728 | 8.966604  |
| C  | -12.476558 | -4.795467 | 8.294008  |
| C  | -12.260044 | -3.460261 | 7.916271  |
| C  | -11.033953 | -2.843397 | 8.215257  |
| C  | -10.050838 | -3.546137 | 8.903357  |
| C  | -10.275059 | -4.873290 | 9.278880  |
| H  | -11.655028 | -6.537946 | 9.258810  |
| H  | -13.429404 | -5.273950 | 8.055699  |
| H  | -10.863257 | -1.810052 | 7.907146  |
| H  | -9.103344  | -3.059729 | 9.144402  |
| H  | -9.499244  | -5.424768 | 9.815135  |
| C  | -13.296197 | -2.720032 | 7.214996  |
| H  | -14.295339 | -3.134351 | 7.105903  |
| H  | -13.136534 | -1.682482 | 6.935735  |
| Cl | -12.827976 | -3.378835 | 4.998856  |
| P  | -14.186590 | -1.492464 | 9.498149  |
| C  | -15.602432 | -0.335629 | 9.535654  |
| C  | -15.568241 | 0.880210  | 10.231734 |
| C  | -16.764421 | -0.695778 | 8.841561  |
| C  | -16.683844 | 1.715406  | 10.238773 |
| H  | -14.666884 | 1.180243  | 10.771132 |
| C  | -17.882128 | 0.136773  | 8.858396  |
| H  | -16.794778 | -1.629162 | 8.275735  |
| C  | -17.842942 | 1.342296  | 9.557627  |
| H  | -16.644838 | 2.665834  | 10.774894 |
| H  | -18.782620 | -0.153116 | 8.312310  |
| H  | -18.714079 | 2.000860  | 9.561078  |
| C  | -12.745071 | -0.441142 | 9.897720  |
| C  | -11.953003 | -0.565766 | 11.043440 |
| C  | -12.385502 | 0.497786  | 8.919877  |
| C  | -10.810929 | 0.222887  | 11.195966 |
| H  | -12.218556 | -1.277497 | 11.827070 |

|   |            |           |           |
|---|------------|-----------|-----------|
| C | -11.247664 | 1.284035  | 9.073016  |
| H | -13.003794 | 0.617153  | 8.027636  |
| C | -10.452042 | 1.142070  | 10.211546 |
| H | -10.199254 | 0.115447  | 12.094758 |
| H | -10.982660 | 2.004418  | 8.297667  |
| H | -9.553990  | 1.752399  | 10.331622 |
| C | -14.438346 | -2.581838 | 10.945993 |
| C | -15.635914 | -2.592938 | 11.673954 |
| C | -13.430974 | -3.500926 | 11.283071 |
| C | -15.818576 | -3.500192 | 12.717541 |
| H | -16.434405 | -1.888740 | 11.430666 |
| C | -13.614961 | -4.401312 | 12.330158 |
| H | -12.486960 | -3.507762 | 10.734990 |
| C | -14.810995 | -4.405724 | 13.048565 |
| H | -16.756523 | -3.494541 | 13.277638 |
| H | -12.817626 | -5.104580 | 12.581561 |
| H | -14.957091 | -5.114342 | 13.867104 |
| B | -13.947126 | 1.565459  | 4.103403  |
| C | -14.170550 | 2.324052  | 5.560668  |
| C | -13.191416 | 2.919456  | 6.352994  |
| C | -15.476849 | 2.548144  | 6.003362  |
| C | -13.470702 | 3.638656  | 7.515576  |
| C | -15.803834 | 3.264436  | 7.147399  |
| C | -14.785543 | 3.804904  | 7.923921  |
| C | -12.364885 | 1.148241  | 3.807762  |
| C | -11.646547 | 1.389558  | 2.634194  |
| C | -11.657824 | 0.420418  | 4.769137  |
| C | -10.320784 | 0.987377  | 2.448450  |
| C | -10.335241 | 0.008653  | 4.636368  |
| C | -9.658616  | 0.291836  | 3.452977  |
| C | -14.526047 | 2.705821  | 3.051710  |
| C | -15.743502 | 2.675038  | 2.374468  |
| C | -13.824910 | 3.906104  | 2.917158  |
| C | -16.215201 | 3.729543  | 1.592149  |
| C | -14.252711 | 4.980794  | 2.148011  |
| C | -15.467492 | 4.892186  | 1.477476  |
| C | -14.744298 | 0.112705  | 3.997052  |
| C | -14.880861 | -0.513098 | 2.755977  |
| C | -15.263703 | -0.624992 | 5.060020  |
| C | -15.534241 | -1.724293 | 2.547459  |
| C | -15.932139 | -1.837284 | 4.901197  |
| C | -16.065542 | -2.398699 | 3.640659  |
| F | -11.892459 | 2.832621  | 6.041049  |
| F | -12.484697 | 4.170553  | 8.231106  |
| F | -15.069572 | 4.485200  | 9.025996  |
| F | -17.072064 | 3.452197  | 7.492060  |
| F | -16.507171 | 2.063057  | 5.302333  |
| F | -12.656202 | 4.064085  | 3.548992  |
| F | -13.522149 | 6.086667  | 2.055925  |
| F | -15.903317 | 5.903472  | 0.738922  |
| F | -17.382596 | 3.630144  | 0.964921  |
| F | -16.553692 | 1.614167  | 2.438393  |
| F | -12.261269 | 0.087963  | 5.914008  |
| F | -9.729168  | -0.660692 | 5.605575  |
| F | -8.407836  | -0.099546 | 3.286250  |
| F | -9.696151  | 1.249711  | 1.310752  |
| F | -12.193568 | 2.027455  | 1.603191  |
| F | -14.342533 | 0.057119  | 1.664509  |

|    |            |           |          |
|----|------------|-----------|----------|
| F  | -15.619787 | -2.248911 | 1.332192 |
| F  | -16.662909 | -3.566989 | 3.483695 |
| F  | -16.390387 | -2.497922 | 5.959185 |
| F  | -15.134532 | -0.205019 | 6.318635 |
| Na | -12.421828 | -1.722785 | 3.094389 |

**TS<sup>M</sup>-e**

95

|    |            |           |           |
|----|------------|-----------|-----------|
| C  | -14.940610 | -7.533996 | 6.517066  |
| C  | -15.789271 | -6.552250 | 6.018309  |
| C  | -15.357645 | -5.218146 | 5.950825  |
| C  | -14.060959 | -4.884943 | 6.370556  |
| C  | -13.215669 | -5.869319 | 6.871843  |
| C  | -13.655909 | -7.192252 | 6.948854  |
| H  | -15.278880 | -8.570856 | 6.570891  |
| H  | -16.792117 | -6.810103 | 5.671468  |
| H  | -13.725557 | -3.846620 | 6.310649  |
| H  | -12.210468 | -5.606028 | 7.207358  |
| H  | -12.991968 | -7.964141 | 7.344951  |
| C  | -16.255240 | -4.186107 | 5.457988  |
| H  | -17.303893 | -4.405026 | 5.279509  |
| H  | -15.930468 | -3.151508 | 5.396412  |
| Cl | -15.860991 | -4.367344 | 3.129863  |
| P  | -17.088684 | -3.177647 | 7.844759  |
| C  | -18.817968 | -3.316585 | 8.435694  |
| C  | -19.569806 | -4.405134 | 7.984635  |
| C  | -19.393148 | -2.414342 | 9.343770  |
| C  | -20.886030 | -4.582783 | 8.414366  |
| H  | -19.134011 | -5.115430 | 7.280154  |
| C  | -20.706794 | -2.590708 | 9.768602  |
| H  | -18.816018 | -1.563964 | 9.715059  |
| C  | -21.455841 | -3.674678 | 9.302628  |
| H  | -21.469901 | -5.425907 | 8.038642  |
| H  | -21.152826 | -1.874871 | 10.462418 |
| H  | -22.491391 | -3.802094 | 9.625075  |
| C  | -16.778137 | -1.392292 | 7.618514  |
| C  | -17.803824 | -0.523064 | 7.226970  |
| C  | -15.461773 | -0.908611 | 7.662410  |
| C  | -17.525680 | 0.803572  | 6.903837  |
| H  | -18.832337 | -0.878663 | 7.174721  |
| C  | -15.185862 | 0.419385  | 7.343344  |
| H  | -14.640744 | -1.569961 | 7.951873  |
| C  | -16.216528 | 1.279282  | 6.962225  |
| H  | -18.343312 | 1.462114  | 6.603774  |
| H  | -14.156521 | 0.782541  | 7.388753  |
| H  | -15.998181 | 2.319426  | 6.709424  |
| C  | -16.116764 | -3.658062 | 9.324394  |
| C  | -15.805148 | -2.770224 | 10.363817 |
| C  | -15.722558 | -4.998523 | 9.428767  |
| C  | -15.104358 | -3.217441 | 11.482152 |
| H  | -16.109059 | -1.722570 | 10.302124 |
| C  | -15.023973 | -5.444397 | 10.550677 |
| H  | -15.960592 | -5.703257 | 8.628220  |
| C  | -14.711251 | -4.553934 | 11.576740 |
| H  | -14.866329 | -2.517927 | 12.286853 |
| H  | -14.720038 | -6.491510 | 10.617753 |
| H  | -14.160265 | -4.900621 | 12.454211 |
| B  | -20.610666 | -2.390849 | 3.024307  |

|    |            |           |           |
|----|------------|-----------|-----------|
| C  | -21.299164 | -2.078213 | 4.497693  |
| C  | -22.324325 | -2.906769 | 4.957405  |
| C  | -21.031112 | -0.990226 | 5.324886  |
| C  | -22.992140 | -2.727544 | 6.162382  |
| C  | -21.673040 | -0.769832 | 6.542846  |
| C  | -22.662194 | -1.643309 | 6.966738  |
| C  | -20.020856 | -3.938740 | 2.886715  |
| C  | -19.820478 | -4.848196 | 3.921615  |
| C  | -19.523653 | -4.383070 | 1.662891  |
| C  | -19.210369 | -6.091477 | 3.759024  |
| C  | -18.902226 | -5.607090 | 1.447868  |
| C  | -18.728105 | -6.475454 | 2.518480  |
| C  | -19.244090 | -1.481106 | 2.756573  |
| C  | -18.956883 | -0.707959 | 1.630827  |
| C  | -18.210522 | -1.537486 | 3.696516  |
| C  | -17.758552 | -0.004449 | 1.466188  |
| C  | -17.001470 | -0.861264 | 3.574497  |
| C  | -16.770149 | -0.087044 | 2.440188  |
| C  | -21.839753 | -2.062420 | 1.971789  |
| C  | -22.307485 | -0.750344 | 1.874882  |
| C  | -22.577925 | -2.991765 | 1.242848  |
| C  | -23.388268 | -0.362394 | 1.093560  |
| C  | -23.671219 | -2.649985 | 0.446129  |
| C  | -24.081167 | -1.326914 | 0.369970  |
| F  | -22.693649 | -3.967515 | 4.230834  |
| F  | -23.926747 | -3.585136 | 6.559448  |
| F  | -23.283686 | -1.449052 | 8.121559  |
| F  | -21.332598 | 0.266661  | 7.303660  |
| F  | -20.116433 | -0.071630 | 4.995575  |
| F  | -18.373148 | -2.271711 | 4.797577  |
| F  | -16.056798 | -0.967771 | 4.496280  |
| F  | -15.624193 | 0.555023  | 2.291488  |
| F  | -17.550121 | 0.717622  | 0.374736  |
| F  | -19.818074 | -0.599992 | 0.620731  |
| F  | -19.565746 | -3.562131 | 0.588143  |
| F  | -18.400845 | -5.902748 | 0.251913  |
| F  | -18.102383 | -7.628567 | 2.360980  |
| F  | -19.039474 | -6.886094 | 4.811449  |
| F  | -20.183409 | -4.567627 | 5.170876  |
| F  | -21.690442 | 0.223521  | 2.553341  |
| F  | -23.767435 | 0.909759  | 1.036464  |
| F  | -25.118861 | -0.985561 | -0.381576 |
| F  | -24.327881 | -3.585728 | -0.231695 |
| F  | -22.279968 | -4.294341 | 1.268424  |
| Na | -17.079726 | -3.082058 | 1.277158  |

### TS<sup>M</sup>-f

95

|   |            |           |          |
|---|------------|-----------|----------|
| C | -15.554096 | -6.490795 | 1.057272 |
| C | -16.372286 | -5.546666 | 0.447548 |
| C | -15.932806 | -4.220216 | 0.308465 |
| C | -14.662426 | -3.855960 | 0.780740 |
| C | -13.844310 | -4.804733 | 1.384733 |
| C | -14.289947 | -6.120499 | 1.525092 |
| H | -15.898650 | -7.521217 | 1.166711 |
| H | -17.357497 | -5.827049 | 0.069810 |
| H | -14.323873 | -2.822711 | 0.672618 |
| H | -12.857807 | -4.517781 | 1.754587 |

|    |            |           |           |
|----|------------|-----------|-----------|
| H  | -13.647555 | -6.864365 | 2.002181  |
| C  | -16.784635 | -3.236624 | -0.336855 |
| H  | -17.800095 | -3.493599 | -0.623477 |
| H  | -16.485311 | -2.194445 | -0.394506 |
| Cl | -16.075589 | -3.498930 | -2.574443 |
| P  | -18.043712 | -2.368675 | 1.961769  |
| C  | -19.565953 | -3.264134 | 2.457080  |
| C  | -20.697767 | -3.102850 | 1.641599  |
| C  | -19.644510 | -4.115567 | 3.565090  |
| C  | -21.880354 | -3.776945 | 1.933231  |
| H  | -20.664018 | -2.435023 | 0.776368  |
| C  | -20.829639 | -4.796273 | 3.849387  |
| H  | -18.784916 | -4.247789 | 4.224463  |
| C  | -21.948415 | -4.630316 | 3.035836  |
| H  | -22.754191 | -3.635261 | 1.295593  |
| H  | -20.875560 | -5.455426 | 4.719419  |
| H  | -22.876148 | -5.161554 | 3.260372  |
| C  | -18.567689 | -0.615801 | 1.968297  |
| C  | -19.583213 | -0.128460 | 2.803778  |
| C  | -17.896442 | 0.269817  | 1.118626  |
| C  | -19.913117 | 1.224149  | 2.787099  |
| H  | -20.117652 | -0.807667 | 3.472224  |
| C  | -18.230942 | 1.623606  | 1.100882  |
| H  | -17.109822 | -0.098200 | 0.458994  |
| C  | -19.239129 | 2.101293  | 1.935296  |
| H  | -20.709324 | 1.594915  | 3.436315  |
| H  | -17.706002 | 2.302124  | 0.424653  |
| H  | -19.510371 | 3.159280  | 1.916012  |
| C  | -16.905643 | -2.502061 | 3.389863  |
| C  | -16.538200 | -1.394971 | 4.167029  |
| C  | -16.320554 | -3.748194 | 3.666652  |
| C  | -15.617287 | -1.535422 | 5.205066  |
| H  | -16.971850 | -0.413049 | 3.966875  |
| C  | -15.409772 | -3.887426 | 4.711793  |
| H  | -16.578082 | -4.623067 | 3.064481  |
| C  | -15.053657 | -2.780522 | 5.482419  |
| H  | -15.342226 | -0.663099 | 5.802513  |
| H  | -14.969283 | -4.865962 | 4.916331  |
| H  | -14.334035 | -2.887788 | 6.297424  |
| B  | -20.588780 | -1.558548 | -3.497650 |
| C  | -21.418545 | -1.239949 | -2.099695 |
| C  | -22.460559 | -2.094105 | -1.732761 |
| C  | -21.299887 | -0.104281 | -1.299332 |
| C  | -23.304082 | -1.875306 | -0.652126 |
| C  | -22.130528 | 0.159691  | -0.209467 |
| C  | -23.128008 | -0.741777 | 0.131622  |
| C  | -19.965590 | -3.097213 | -3.564714 |
| C  | -19.823864 | -3.988191 | -2.503529 |
| C  | -19.427692 | -3.573112 | -4.760773 |
| C  | -19.255034 | -5.255024 | -2.622722 |
| C  | -18.843051 | -4.823303 | -4.932062 |
| C  | -18.747227 | -5.678138 | -3.840669 |
| C  | -19.235640 | -0.612594 | -3.682353 |
| C  | -18.869343 | 0.105054  | -4.822841 |
| C  | -18.296124 | -0.574405 | -2.647654 |
| C  | -17.682750 | 0.839128  | -4.920416 |
| C  | -17.099208 | 0.133069  | -2.704328 |
| C  | -16.787945 | 0.850461  | -3.856718 |

|    |            |           |           |
|----|------------|-----------|-----------|
| C  | -21.747039 | -1.275659 | -4.645121 |
| C  | -22.219601 | 0.027766  | -4.812860 |
| C  | -22.433651 | -2.234604 | -5.386933 |
| C  | -23.257049 | 0.379619  | -5.666760 |
| C  | -23.482189 | -1.929302 | -6.255482 |
| C  | -23.899101 | -0.613974 | -6.397377 |
| F  | -22.696604 | -3.199153 | -2.447296 |
| F  | -24.260390 | -2.749617 | -0.348318 |
| F  | -23.912688 | -0.519354 | 1.176239  |
| F  | -21.986881 | 1.277597  | 0.492874  |
| F  | -20.381416 | 0.833245  | -1.549712 |
| F  | -18.539862 | -1.246986 | -1.524243 |
| F  | -16.240755 | 0.118710  | -1.692070 |
| F  | -15.653004 | 1.522212  | -3.940104 |
| F  | -17.395017 | 1.502933  | -6.029933 |
| F  | -19.638152 | 0.127002  | -5.908641 |
| F  | -19.415060 | -2.773693 | -5.848368 |
| F  | -18.331138 | -5.173974 | -6.106467 |
| F  | -18.169750 | -6.860996 | -3.959751 |
| F  | -19.155949 | -6.040613 | -1.557564 |
| F  | -20.217427 | -3.668869 | -1.269754 |
| F  | -21.654893 | 1.029726  | -4.129555 |
| F  | -23.643532 | 1.645240  | -5.784978 |
| F  | -24.895155 | -0.307323 | -7.217050 |
| F  | -24.090323 | -2.892832 | -6.939445 |
| F  | -22.127879 | -3.532850 | -5.304466 |
| Na | -16.981776 | -2.314303 | -4.654410 |

### TS<sup>M</sup>-g

95

|    |            |           |           |
|----|------------|-----------|-----------|
| C  | -13.371852 | -5.526655 | 10.044847 |
| C  | -13.983043 | -4.362774 | 9.593366  |
| C  | -13.369947 | -3.115758 | 9.794439  |
| C  | -12.125389 | -3.056840 | 10.445396 |
| C  | -11.518321 | -4.220941 | 10.899368 |
| C  | -12.142809 | -5.455931 | 10.702432 |
| H  | -13.857978 | -6.491550 | 9.888645  |
| H  | -14.943770 | -4.414122 | 9.081450  |
| H  | -11.639596 | -2.089922 | 10.591145 |
| H  | -10.554394 | -4.169742 | 11.409726 |
| H  | -11.665688 | -6.369893 | 11.063613 |
| C  | -14.027118 | -1.901268 | 9.354935  |
| H  | -15.030814 | -1.940138 | 8.932890  |
| H  | -13.606369 | -0.929466 | 9.588952  |
| Cl | -13.101709 | -1.632700 | 7.179652  |
| P  | -15.286612 | -1.528399 | 11.790551 |
| C  | -15.537095 | -3.257773 | 12.314639 |
| C  | -16.506929 | -4.013145 | 11.637828 |
| C  | -14.687779 | -3.904670 | 13.220992 |
| C  | -16.656406 | -5.373473 | 11.894558 |
| H  | -17.143981 | -3.539436 | 10.888642 |
| C  | -14.827543 | -5.271405 | 13.463746 |
| H  | -13.904425 | -3.347741 | 13.738813 |
| C  | -15.815314 | -6.006930 | 12.809894 |
| H  | -17.421680 | -5.941780 | 11.361437 |
| H  | -14.155830 | -5.762995 | 14.171308 |
| H  | -15.923082 | -7.076303 | 13.005649 |
| C  | -16.849762 | -0.624711 | 12.134570 |

|   |            |           |           |
|---|------------|-----------|-----------|
| C | -18.074198 | -1.228420 | 12.439209 |
| C | -16.796370 | 0.772875  | 12.008132 |
| C | -19.225012 | -0.451850 | 12.592026 |
| H | -18.147063 | -2.309742 | 12.562891 |
| C | -17.941264 | 1.544600  | 12.171018 |
| H | -15.851901 | 1.264610  | 11.762915 |
| C | -19.164506 | 0.932346  | 12.452877 |
| H | -20.175376 | -0.939820 | 12.820584 |
| H | -17.883540 | 2.628205  | 12.052688 |
| H | -20.069710 | 1.535842  | 12.552009 |
| C | -14.155766 | -0.806137 | 13.038101 |
| C | -12.929300 | -0.274145 | 12.628117 |
| C | -14.508710 | -0.748331 | 14.395380 |
| C | -12.059032 | 0.295831  | 13.559735 |
| H | -12.650054 | -0.292247 | 11.573289 |
| C | -13.639748 | -0.182286 | 15.323597 |
| H | -15.470520 | -1.148965 | 14.726531 |
| C | -12.411954 | 0.338888  | 14.906539 |
| H | -11.104764 | 0.710436  | 13.227214 |
| H | -13.922113 | -0.143204 | 16.378149 |
| H | -11.732170 | 0.784995  | 15.636321 |
| B | -17.760651 | 0.276394  | 6.757356  |
| C | -18.908349 | 0.761640  | 7.848323  |
| C | -20.133197 | 0.091232  | 7.872893  |
| C | -18.848826 | 1.872230  | 8.688547  |
| C | -21.198691 | 0.435009  | 8.695822  |
| C | -19.900535 | 2.269045  | 9.512923  |
| C | -21.078648 | 1.539313  | 9.530788  |
| C | -17.375720 | -1.335630 | 6.874922  |
| C | -17.741309 | -2.238360 | 7.874434  |
| C | -16.522072 | -1.884264 | 5.924951  |
| C | -17.362798 | -3.581676 | 7.864904  |
| C | -16.074852 | -3.195105 | 5.894757  |
| C | -16.508250 | -4.065347 | 6.883756  |
| C | -16.288106 | 1.006091  | 6.978790  |
| C | -15.484710 | 1.605365  | 6.012592  |
| C | -15.690740 | 0.924250  | 8.235272  |
| C | -14.212299 | 2.119422  | 6.274016  |
| C | -14.447005 | 1.453101  | 8.551697  |
| C | -13.683792 | 2.045227  | 7.554651  |
| C | -18.461249 | 0.669666  | 5.310020  |
| C | -18.667805 | 2.018504  | 5.013509  |
| C | -18.999803 | -0.212689 | 4.376109  |
| C | -19.319436 | 2.477762  | 3.875608  |
| C | -19.663058 | 0.201264  | 3.220444  |
| C | -19.826139 | 1.555387  | 2.966891  |
| F | -20.326855 | -0.966196 | 7.076198  |
| F | -22.323504 | -0.272959 | 8.686812  |
| F | -22.071550 | 1.886303  | 10.339583 |
| F | -19.774623 | 3.334012  | 10.299840 |
| F | -17.759405 | 2.643132  | 8.757444  |
| F | -16.335987 | 0.295859  | 9.216773  |
| F | -13.951156 | 1.341595  | 9.782188  |
| F | -12.472102 | 2.506690  | 7.814234  |
| F | -13.481472 | 2.622303  | 5.279345  |
| F | -15.861629 | 1.677094  | 4.727141  |
| F | -16.061798 | -1.104110 | 4.913988  |
| F | -15.228075 | -3.595900 | 4.952198  |



|    |            |           |          |
|----|------------|-----------|----------|
| F  | -16.106305 | -5.327006 | 6.906148 |
| F  | -17.785492 | -4.406950 | 8.816654 |
| F  | -18.493836 | -1.870555 | 8.912502 |
| F  | -18.212523 | 2.958313  | 5.849688 |
| F  | -19.467010 | 3.779262  | 3.652355 |
| F  | -20.454898 | 1.965080  | 1.873517 |
| F  | -20.146966 | -0.694213 | 2.365554 |
| F  | -18.914213 | -1.536956 | 4.535637 |
| Na | -13.812313 | -0.619181 | 4.916606 |

**[Bn-PPh<sub>3</sub>]<sup>+</sup>NaCl<sup>-</sup>[BAr<sup>F</sup><sub>20</sub>]<sup>-</sup>**

95

|    |            |           |           |
|----|------------|-----------|-----------|
| C  | -14.762069 | -7.106330 | 7.271629  |
| C  | -15.824243 | -6.214225 | 7.132605  |
| C  | -15.599446 | -4.907533 | 6.683315  |
| C  | -14.294629 | -4.512306 | 6.363629  |
| C  | -13.234416 | -5.407232 | 6.495750  |
| C  | -13.464166 | -6.703573 | 6.956276  |
| H  | -14.951151 | -8.122955 | 7.623807  |
| H  | -16.839196 | -6.536773 | 7.377117  |
| H  | -14.106055 | -3.494012 | 6.014940  |
| H  | -12.221987 | -5.090723 | 6.241836  |
| H  | -12.631238 | -7.402292 | 7.062550  |
| C  | -16.732355 | -3.919870 | 6.576453  |
| H  | -17.655727 | -4.380377 | 6.193216  |
| H  | -16.467174 | -3.106020 | 5.890381  |
| Cl | -16.066192 | -2.518305 | 0.155594  |
| P  | -17.184344 | -3.128030 | 8.159780  |
| C  | -17.952162 | -4.340970 | 9.254981  |
| C  | -18.973860 | -5.159877 | 8.750274  |
| C  | -17.582304 | -4.428196 | 10.601774 |
| C  | -19.605161 | -6.072275 | 9.589325  |
| H  | -19.283034 | -5.088152 | 7.704756  |
| C  | -18.221181 | -5.345569 | 11.435045 |
| H  | -16.800145 | -3.784121 | 11.008058 |
| C  | -19.226852 | -6.167477 | 10.930127 |
| H  | -20.397505 | -6.711295 | 9.194634  |
| H  | -17.929000 | -5.414575 | 12.484704 |
| H  | -19.723356 | -6.886315 | 11.585668 |
| C  | -18.371427 | -1.810655 | 7.822486  |
| C  | -19.427373 | -1.573539 | 8.711492  |
| C  | -18.186775 | -0.976343 | 6.712554  |
| C  | -20.293738 | -0.506706 | 8.482643  |
| H  | -19.576743 | -2.216851 | 9.581450  |
| C  | -19.054966 | 0.088308  | 6.492753  |
| H  | -17.358119 | -1.137621 | 6.026157  |
| C  | -20.108061 | 0.322974  | 7.376809  |
| H  | -21.117835 | -0.323265 | 9.174857  |
| H  | -18.902607 | 0.739391  | 5.629447  |
| H  | -20.788630 | 1.159361  | 7.203302  |
| C  | -15.732686 | -2.418133 | 8.959167  |
| C  | -15.675821 | -1.040119 | 9.191734  |
| C  | -14.663301 | -3.243210 | 9.347031  |
| C  | -14.548959 | -0.483771 | 9.792486  |
| H  | -16.501266 | -0.391987 | 8.898921  |
| C  | -13.541832 | -2.677229 | 9.943724  |
| H  | -14.705956 | -4.323348 | 9.195510  |
| C  | -13.483536 | -1.299312 | 10.164673 |

|    |            |           |           |
|----|------------|-----------|-----------|
| H  | -14.507732 | 0.593791  | 9.961146  |
| H  | -12.706143 | -3.316048 | 10.235617 |
| H  | -12.598777 | -0.860381 | 10.629365 |
| B  | -13.650624 | 0.866318  | 4.336268  |
| C  | -14.299885 | 1.992693  | 5.358443  |
| C  | -14.199703 | 3.376975  | 5.244718  |
| C  | -15.163807 | 1.557944  | 6.364009  |
| C  | -14.875988 | 4.265095  | 6.083005  |
| C  | -15.856434 | 2.401631  | 7.220855  |
| C  | -15.711232 | 3.777303  | 7.077566  |
| C  | -12.474052 | 1.474292  | 3.342329  |
| C  | -11.366133 | 2.101284  | 3.918824  |
| C  | -12.373533 | 1.316740  | 1.966065  |
| C  | -10.271332 | 2.565958  | 3.200658  |
| C  | -11.298201 | 1.755463  | 1.197040  |
| C  | -10.234176 | 2.389385  | 1.821199  |
| C  | -15.019729 | 0.347769  | 3.548896  |
| C  | -15.703560 | -0.843598 | 3.788107  |
| C  | -15.710195 | 1.238473  | 2.720650  |
| C  | -16.956085 | -1.147557 | 3.257485  |
| C  | -16.953667 | 0.974850  | 2.156560  |
| C  | -17.588283 | -0.231815 | 2.430864  |
| C  | -12.828600 | -0.346342 | 5.116319  |
| C  | -12.390517 | -1.449860 | 4.389167  |
| C  | -12.371189 | -0.324196 | 6.434355  |
| C  | -11.595906 | -2.472826 | 4.885497  |
| C  | -11.559478 | -1.319025 | 6.981244  |
| C  | -11.172619 | -2.403290 | 6.207180  |
| F  | -13.444251 | 3.946808  | 4.303902  |
| F  | -14.733369 | 5.576432  | 5.926620  |
| F  | -16.362227 | 4.607685  | 7.879879  |
| F  | -16.655836 | 1.916523  | 8.168904  |
| F  | -15.350625 | 0.244065  | 6.540239  |
| F  | -15.177405 | 2.429985  | 2.443454  |
| F  | -17.538554 | 1.863036  | 1.364866  |
| F  | -18.767241 | -0.504928 | 1.901504  |
| F  | -17.537151 | -2.306003 | 3.538488  |
| F  | -15.176535 | -1.795759 | 4.572268  |
| F  | -13.341211 | 0.684783  | 1.261405  |
| F  | -11.281526 | 1.558010  | -0.114961 |
| F  | -9.197360  | 2.817337  | 1.116782  |
| F  | -9.260627  | 3.165547  | 3.816942  |
| F  | -11.325451 | 2.289063  | 5.240602  |
| F  | -12.738658 | -1.570459 | 3.085727  |
| F  | -11.246257 | -3.501512 | 4.124222  |
| F  | -10.408550 | -3.358240 | 6.719070  |
| F  | -11.130670 | -1.225204 | 8.233736  |
| F  | -12.664227 | 0.683258  | 7.257605  |
| Na | -14.198221 | -1.442029 | 1.326763  |

**Na[BAr<sup>F</sup><sub>20</sub>]<sup>+</sup>Na[BAr<sup>F</sup><sub>20</sub>]<sup>-</sup>BnCl<sup>-</sup>PPh<sub>3</sub>**

141

|   |            |           |          |
|---|------------|-----------|----------|
| C | -25.126088 | -8.048867 | 5.818847 |
| C | -24.920042 | -7.158216 | 4.768381 |
| C | -23.721737 | -6.439813 | 4.675515 |
| C | -22.729538 | -6.629713 | 5.643358 |
| C | -22.934116 | -7.524288 | 6.692294 |
| C | -24.132352 | -8.232958 | 6.781837 |

|    |            |           |           |
|----|------------|-----------|-----------|
| H  | -26.067730 | -8.597833 | 5.889628  |
| H  | -25.696259 | -7.011184 | 4.013062  |
| H  | -21.796102 | -6.064607 | 5.578268  |
| H  | -22.157938 | -7.661535 | 7.448121  |
| H  | -24.295280 | -8.927886 | 7.608940  |
| C  | -23.522840 | -5.455819 | 3.571510  |
| H  | -24.454537 | -4.956151 | 3.299156  |
| H  | -22.748980 | -4.716140 | 3.801564  |
| Cl | -22.957989 | -6.276821 | 2.016806  |
| P  | -25.252140 | -2.840816 | 6.093722  |
| C  | -26.948018 | -3.552725 | 6.135115  |
| C  | -27.291678 | -4.461930 | 5.128150  |
| C  | -27.900956 | -3.235560 | 7.114127  |
| C  | -28.553257 | -5.057321 | 5.103125  |
| H  | -26.569320 | -4.696937 | 4.345710  |
| C  | -29.162974 | -3.826171 | 7.088808  |
| H  | -27.655203 | -2.521302 | 7.904146  |
| C  | -29.490633 | -4.740498 | 6.085027  |
| H  | -28.804553 | -5.761564 | 4.306440  |
| H  | -29.896394 | -3.571096 | 7.857471  |
| H  | -30.481919 | -5.199776 | 6.066032  |
| C  | -25.544321 | -1.175323 | 6.835413  |
| C  | -26.370969 | -0.297700 | 6.114639  |
| C  | -24.934730 | -0.711249 | 8.005745  |
| C  | -26.583719 | 1.006325  | 6.552326  |
| H  | -26.855210 | -0.634863 | 5.196080  |
| C  | -25.143885 | 0.599776  | 8.440916  |
| H  | -24.287727 | -1.370238 | 8.589244  |
| C  | -25.964431 | 1.462476  | 7.717262  |
| H  | -27.225779 | 1.672546  | 5.971282  |
| H  | -24.655610 | 0.947318  | 9.354650  |
| H  | -26.114841 | 2.491465  | 8.051086  |
| C  | -24.381960 | -3.757282 | 7.433971  |
| C  | -24.996989 | -4.672491 | 8.296597  |
| C  | -22.998794 | -3.548676 | 7.550230  |
| C  | -24.250528 | -5.343124 | 9.266633  |
| H  | -26.067741 | -4.870555 | 8.215686  |
| C  | -22.256666 | -4.204637 | 8.530136  |
| H  | -22.496674 | -2.854404 | 6.872834  |
| C  | -22.882620 | -5.105401 | 9.392719  |
| H  | -24.745834 | -6.056787 | 9.929392  |
| H  | -21.183386 | -4.017503 | 8.612993  |
| H  | -22.302359 | -5.628286 | 10.156703 |
| B  | -24.797658 | -0.719227 | 1.062772  |
| C  | -26.134871 | 0.267114  | 1.092472  |
| C  | -27.125686 | 0.007454  | 2.044964  |
| C  | -26.489239 | 1.238082  | 0.152207  |
| C  | -28.347086 | 0.664843  | 2.113536  |
| C  | -27.704163 | 1.930353  | 0.181742  |
| C  | -28.635657 | 1.649388  | 1.173517  |
| C  | -23.983660 | -0.815926 | 2.512155  |
| C  | -24.072083 | 0.067438  | 3.582632  |
| C  | -22.975513 | -1.762926 | 2.681462  |
| C  | -23.257941 | 0.036007  | 4.711210  |
| C  | -22.135796 | -1.855199 | 3.781177  |
| C  | -22.270618 | -0.931281 | 4.810052  |
| C  | -23.595426 | -0.197796 | 0.046836  |
| C  | -22.900317 | -0.959290 | -0.886119 |

|    |            |           |           |
|----|------------|-----------|-----------|
| C  | -23.094752 | 1.095413  | 0.173039  |
| C  | -21.844168 | -0.487876 | -1.661175 |
| C  | -22.063315 | 1.636301  | -0.580323 |
| C  | -21.422899 | 0.826441  | -1.513002 |
| C  | -25.492722 | -2.146133 | 0.588164  |
| C  | -25.977918 | -2.285853 | -0.715576 |
| C  | -25.818788 | -3.200497 | 1.440415  |
| C  | -26.668037 | -3.405103 | -1.170096 |
| C  | -26.508470 | -4.343611 | 1.030244  |
| C  | -26.933953 | -4.449485 | -0.288042 |
| F  | -26.921763 | -0.943143 | 2.956494  |
| F  | -29.224920 | 0.349856  | 3.049528  |
| F  | -29.784413 | 2.300268  | 1.211026  |
| F  | -27.975185 | 2.849680  | -0.729510 |
| F  | -25.661246 | 1.575725  | -0.837845 |
| F  | -23.642640 | 1.929102  | 1.088621  |
| F  | -21.686206 | 2.892254  | -0.418906 |
| F  | -20.428458 | 1.300004  | -2.242596 |
| F  | -21.239295 | -1.286574 | -2.526937 |
| F  | -23.211995 | -2.260726 | -1.102312 |
| F  | -22.753911 | -2.685513 | 1.712386  |
| F  | -21.219849 | -2.810605 | 3.859643  |
| F  | -21.480041 | -0.982462 | 5.869157  |
| F  | -23.416818 | 0.919874  | 5.677281  |
| F  | -24.979919 | 1.069200  | 3.586506  |
| F  | -25.780016 | -1.311138 | -1.601303 |
| F  | -27.073246 | -3.485306 | -2.427290 |
| F  | -27.582727 | -5.523364 | -0.699121 |
| F  | -26.761896 | -5.323694 | 1.888551  |
| F  | -25.480667 | -3.156121 | 2.728436  |
| Na | -23.287416 | -4.198902 | 0.123385  |
| B  | -25.739862 | 6.289715  | 2.996425  |
| C  | -25.705981 | 6.666039  | 1.380970  |
| C  | -25.865251 | 5.659446  | 0.435075  |
| C  | -25.635107 | 7.943357  | 0.824715  |
| C  | -25.887428 | 5.835401  | -0.939907 |
| C  | -25.664059 | 8.185050  | -0.549331 |
| C  | -25.788847 | 7.128321  | -1.440475 |
| C  | -27.302602 | 5.781177  | 3.219703  |
| C  | -27.753382 | 4.506846  | 3.535626  |
| C  | -28.335989 | 6.695408  | 2.994317  |
| C  | -29.090346 | 4.149397  | 3.678964  |
| C  | -29.687440 | 6.390780  | 3.104050  |
| C  | -30.073121 | 5.099707  | 3.450474  |
| C  | -25.327854 | 7.559769  | 3.973608  |
| C  | -26.037112 | 8.019203  | 5.081124  |
| C  | -24.087150 | 8.173265  | 3.787811  |
| C  | -25.576015 | 9.033859  | 5.920626  |
| C  | -23.588017 | 9.186679  | 4.595519  |
| C  | -24.343579 | 9.622628  | 5.678394  |
| C  | -24.583300 | 5.172647  | 3.444113  |
| C  | -24.578577 | 4.707180  | 4.765716  |
| C  | -23.465165 | 4.785731  | 2.701120  |
| C  | -23.570399 | 3.926069  | 5.317732  |
| C  | -22.438087 | 3.984674  | 3.207656  |
| C  | -22.489305 | 3.553543  | 4.524740  |
| F  | -25.986648 | 4.371946  | 0.852881  |
| F  | -25.998385 | 4.803608  | -1.764217 |

|    |            |           |           |
|----|------------|-----------|-----------|
| F  | -25.812935 | 7.346496  | -2.746371 |
| F  | -25.582641 | 9.426394  | -1.010714 |
| F  | -25.539100 | 9.032799  | 1.586057  |
| F  | -23.305987 | 7.792718  | 2.770266  |
| F  | -22.402379 | 9.733433  | 4.349663  |
| F  | -23.890728 | 10.586341 | 6.468305  |
| F  | -26.304966 | 9.430188  | 6.958673  |
| F  | -27.218974 | 7.497397  | 5.419711  |
| F  | -28.043227 | 7.959118  | 2.680061  |
| F  | -30.609919 | 7.317676  | 2.883804  |
| F  | -31.354006 | 4.786290  | 3.562868  |
| F  | -29.419884 | 2.909825  | 4.017278  |
| F  | -26.884802 | 3.480201  | 3.725224  |
| F  | -25.581461 | 5.030810  | 5.582616  |
| F  | -23.628181 | 3.541604  | 6.582131  |
| F  | -21.517509 | 2.804384  | 5.016717  |
| F  | -21.412714 | 3.640829  | 2.442864  |
| F  | -23.313585 | 5.159441  | 1.427952  |
| Na | -25.361062 | 2.784234  | 2.230870  |

### TS<sup>D</sup>

141

|    |            |           |          |
|----|------------|-----------|----------|
| C  | -24.161746 | -8.557999 | 5.807793 |
| C  | -24.698716 | -7.499480 | 5.084348 |
| C  | -23.906778 | -6.379121 | 4.782581 |
| C  | -22.569543 | -6.339994 | 5.210962 |
| C  | -22.035675 | -7.401133 | 5.932479 |
| C  | -22.831618 | -8.508900 | 6.232321 |
| H  | -24.780055 | -9.426614 | 6.043515 |
| H  | -25.736656 | -7.531807 | 4.745749 |
| H  | -21.956046 | -5.468365 | 4.972946 |
| H  | -20.997433 | -7.364879 | 6.268290 |
| H  | -22.412298 | -9.340629 | 6.803163 |
| C  | -24.462115 | -5.265759 | 4.037829 |
| H  | -25.500234 | -5.260013 | 3.723934 |
| H  | -23.871674 | -4.369414 | 3.870156 |
| Cl | -23.975231 | -5.993088 | 1.795581 |
| P  | -25.384409 | -4.061454 | 6.275555 |
| C  | -26.978195 | -4.844165 | 6.733730 |
| C  | -27.693475 | -5.566411 | 5.773073 |
| C  | -27.522866 | -4.684678 | 8.017265 |
| C  | -28.928012 | -6.135943 | 6.091937 |
| H  | -27.298754 | -5.679647 | 4.761981 |
| C  | -28.751064 | -5.256725 | 8.335330 |
| H  | -26.982391 | -4.107112 | 8.771963 |
| C  | -29.454547 | -5.985566 | 7.372667 |
| H  | -29.478404 | -6.695263 | 5.332149 |
| H  | -29.165629 | -5.129308 | 9.337905 |
| H  | -30.420040 | -6.431313 | 7.623198 |
| C  | -25.727026 | -2.301959 | 6.681910 |
| C  | -26.598598 | -1.619077 | 5.821490 |
| C  | -25.231099 | -1.641047 | 7.813320 |
| C  | -26.982399 | -0.307745 | 6.095863 |
| H  | -26.989984 | -2.116800 | 4.932116 |
| C  | -25.610659 | -0.325760 | 8.079452 |
| H  | -24.555461 | -2.150351 | 8.502699 |
| C  | -26.489721 | 0.341045  | 7.227336 |
| H  | -27.662121 | 0.207498  | 5.414682 |

|   |            |           |           |
|---|------------|-----------|-----------|
| H | -25.214230 | 0.180156  | 8.962605  |
| H | -26.777628 | 1.373741  | 7.436285  |
| C | -24.180336 | -4.637392 | 7.518774  |
| C | -24.387860 | -5.783993 | 8.294493  |
| C | -22.933153 | -3.996051 | 7.575557  |
| C | -23.375085 | -6.265337 | 9.124597  |
| H | -25.339919 | -6.316287 | 8.250789  |
| C | -21.928997 | -4.469980 | 8.415170  |
| H | -22.741035 | -3.116057 | 6.959012  |
| C | -22.147394 | -5.608816 | 9.191789  |
| H | -23.550907 | -7.163264 | 9.721380  |
| H | -20.968518 | -3.951325 | 8.454587  |
| H | -21.357884 | -5.986822 | 9.845364  |
| B | -24.989878 | -0.384543 | 1.279134  |
| C | -26.255620 | 0.686178  | 1.150240  |
| C | -27.354994 | 0.516927  | 1.998304  |
| C | -26.451538 | 1.636748  | 0.145211  |
| C | -28.545058 | 1.225844  | 1.896241  |
| C | -27.626573 | 2.381838  | 0.007689  |
| C | -28.681913 | 2.173560  | 0.886142  |
| C | -24.311124 | -0.467082 | 2.793039  |
| C | -24.456936 | 0.434927  | 3.840393  |
| C | -23.374960 | -1.462930 | 3.062777  |
| C | -23.758888 | 0.374478  | 5.043069  |
| C | -22.667284 | -1.596849 | 4.248482  |
| C | -22.862761 | -0.661352 | 5.258976  |
| C | -23.685872 | 0.024809  | 0.336300  |
| C | -23.019701 | -0.774151 | -0.585533 |
| C | -23.076970 | 1.264841  | 0.514316  |
| C | -21.887980 | -0.386586 | -1.298473 |
| C | -21.963841 | 1.723405  | -0.174100 |
| C | -21.354281 | 0.878120  | -1.095795 |
| C | -25.749001 | -1.790261 | 0.825587  |
| C | -26.210500 | -1.920963 | -0.489089 |
| C | -26.173584 | -2.805429 | 1.683915  |
| C | -26.983916 | -2.984633 | -0.940351 |
| C | -26.966886 | -3.880529 | 1.281632  |
| C | -27.365951 | -3.979433 | -0.043760 |
| F | -27.296312 | -0.395315 | 2.969033  |
| F | -29.536289 | 0.996493  | 2.740702  |
| F | -29.799645 | 2.865427  | 0.757576  |
| F | -27.744097 | 3.277716  | -0.958284 |
| F | -25.500815 | 1.897302  | -0.753715 |
| F | -23.600035 | 2.133725  | 1.412665  |
| F | -21.483526 | 2.936475  | 0.035373  |
| F | -20.285133 | 1.272840  | -1.763973 |
| F | -21.318625 | -1.219035 | -2.156061 |
| F | -23.435360 | -2.035637 | -0.848563 |
| F | -23.104236 | -2.392685 | 2.119497  |
| F | -21.817477 | -2.600320 | 4.420913  |
| F | -22.201415 | -0.752948 | 6.400439  |
| F | -23.941251 | 1.299074  | 5.968867  |
| F | -25.305318 | 1.484422  | 3.745487  |
| F | -25.912340 | -0.982769 | -1.387736 |
| F | -27.363532 | -3.056328 | -2.206525 |
| F | -28.101698 | -4.998085 | -0.449387 |
| F | -27.333524 | -4.807658 | 2.155860  |
| F | -25.840856 | -2.799719 | 2.976570  |

|    |            |           |           |
|----|------------|-----------|-----------|
| Na | -23.677279 | -3.869677 | 0.441771  |
| B  | -25.603109 | 6.737392  | 2.692936  |
| C  | -25.337105 | 6.983442  | 1.074950  |
| C  | -25.441537 | 5.915816  | 0.189871  |
| C  | -25.117678 | 8.208717  | 0.445789  |
| C  | -25.291421 | 5.988784  | -1.186553 |
| C  | -24.969134 | 8.346579  | -0.934826 |
| C  | -25.054405 | 7.233162  | -1.758982 |
| C  | -27.215728 | 6.345582  | 2.735608  |
| C  | -27.799265 | 5.129698  | 3.065583  |
| C  | -28.139465 | 7.306948  | 2.313952  |
| C  | -29.166869 | 4.872844  | 3.047560  |
| C  | -29.512555 | 7.101177  | 2.257080  |
| C  | -30.036337 | 5.866137  | 2.625422  |
| C  | -25.232575 | 8.049550  | 3.630354  |
| C  | -26.043115 | 8.627620  | 4.604895  |
| C  | -23.940069 | 8.575026  | 3.569435  |
| C  | -25.624426 | 9.670777  | 5.431594  |
| C  | -23.479502 | 9.611831  | 4.370483  |
| C  | -24.333894 | 10.166284 | 5.317218  |
| C  | -24.594024 | 5.589229  | 3.360615  |
| C  | -24.806075 | 5.196508  | 4.688247  |
| C  | -23.408500 | 5.100606  | 2.804330  |
| C  | -23.949682 | 4.371017  | 5.408194  |
| C  | -22.517851 | 4.270167  | 3.489852  |
| C  | -22.788617 | 3.903266  | 4.800187  |
| F  | -25.689031 | 4.672000  | 0.677981  |
| F  | -25.369777 | 4.905926  | -1.946427 |
| F  | -24.911325 | 7.352497  | -3.070071 |
| F  | -24.754754 | 9.542678  | -1.467639 |
| F  | -25.042273 | 9.345099  | 1.137827  |
| F  | -23.064280 | 8.078232  | 2.688355  |
| F  | -22.238188 | 10.068985 | 4.247242  |
| F  | -23.919878 | 11.153923 | 6.098805  |
| F  | -26.450788 | 10.182984 | 6.337510  |
| F  | -27.291242 | 8.202705  | 4.818447  |
| F  | -27.714938 | 8.522725  | 1.963654  |
| F  | -30.325790 | 8.069134  | 1.856635  |
| F  | -31.340686 | 5.646817  | 2.581873  |
| F  | -29.631970 | 3.687129  | 3.416959  |
| F  | -27.043610 | 4.063809  | 3.437265  |
| F  | -25.885737 | 5.629111  | 5.339345  |
| F  | -24.226892 | 4.036324  | 6.658312  |
| F  | -21.947990 | 3.123643  | 5.458087  |
| F  | -21.415215 | 3.833092  | 2.900897  |
| F  | -23.055824 | 5.396078  | 1.551903  |
| Na | -25.370164 | 3.166756  | 2.265084  |

[BAr<sup>F</sup><sub>20</sub>]<sup>-</sup>...Na[BAr<sup>F</sup><sub>20</sub>]

|    |            |           |           |
|----|------------|-----------|-----------|
| 91 |            |           |           |
| B  | -24.909623 | -0.217520 | 1.427812  |
| C  | -26.225741 | 0.780367  | 1.199792  |
| C  | -27.351641 | 0.598820  | 2.012185  |
| C  | -26.423168 | 1.673186  | 0.143494  |
| C  | -28.565977 | 1.248904  | 1.825788  |
| C  | -27.620922 | 2.359616  | -0.075746 |
| C  | -28.700984 | 2.142913  | 0.767951  |
| C  | -24.279693 | -0.179307 | 2.963179  |
| C  | -24.572885 | 0.708166  | 3.990109  |

|   |            |           |           |
|---|------------|-----------|-----------|
| C | -23.249287 | -1.070591 | 3.277225  |
| C | -23.959519 | 0.709768  | 5.239747  |
| C | -22.590481 | -1.104807 | 4.500159  |
| C | -22.945943 | -0.200400 | 5.495856  |
| C | -23.600194 | 0.196810  | 0.497837  |
| C | -22.880310 | -0.645366 | -0.349246 |
| C | -23.046699 | 1.467082  | 0.619676  |
| C | -21.742850 | -0.240290 | -1.048540 |
| C | -21.926491 | 1.928825  | -0.054567 |
| C | -21.260984 | 1.053134  | -0.904685 |
| C | -25.562247 | -1.684819 | 1.029847  |
| C | -25.997234 | -1.891654 | -0.280928 |
| C | -25.860943 | -2.725671 | 1.906227  |
| C | -26.641439 | -3.041703 | -0.718149 |
| C | -26.506565 | -3.898570 | 1.513088  |
| C | -26.901493 | -4.059309 | 0.193118  |
| F | -27.294762 | -0.253973 | 3.035386  |
| F | -29.585912 | 1.019996  | 2.637094  |
| F | -29.842627 | 2.777865  | 0.563095  |
| F | -27.736057 | 3.207885  | -1.086111 |
| F | -25.450336 | 1.937084  | -0.730648 |
| F | -23.635784 | 2.369012  | 1.446830  |
| F | -21.492211 | 3.170910  | 0.099779  |
| F | -20.183360 | 1.448176  | -1.565609 |
| F | -21.109400 | -1.091834 | -1.845479 |
| F | -23.235701 | -1.916226 | -0.538301 |
| F | -22.862638 | -1.977471 | 2.377050  |
| F | -21.627468 | -1.988784 | 4.725932  |
| F | -22.333019 | -0.215498 | 6.669033  |
| F | -24.331976 | 1.578047  | 6.169808  |
| F | -25.508392 | 1.679310  | 3.834557  |
| F | -25.787950 | -0.947212 | -1.205023 |
| F | -27.014957 | -3.173990 | -1.986417 |
| F | -27.518803 | -5.166886 | -0.195238 |
| F | -26.757226 | -4.857264 | 2.398858  |
| F | -25.551072 | -2.657411 | 3.203580  |
| B | -25.774652 | 6.874672  | 2.504707  |
| C | -25.421261 | 7.047691  | 0.893911  |
| C | -25.480558 | 5.937936  | 0.057430  |
| C | -25.164745 | 8.240932  | 0.219574  |
| C | -25.253556 | 5.944508  | -1.310461 |
| C | -24.938511 | 8.311800  | -1.155454 |
| C | -24.981041 | 7.159829  | -1.928032 |
| C | -27.384025 | 6.466875  | 2.473833  |
| C | -27.973312 | 5.259031  | 2.823281  |
| C | -28.290908 | 7.395598  | 1.954147  |
| C | -29.334846 | 4.983257  | 2.735991  |
| C | -29.655617 | 7.168723  | 1.824100  |
| C | -30.187780 | 5.944971  | 2.217397  |
| C | -25.469842 | 8.232701  | 3.399652  |
| C | -26.339845 | 8.845907  | 4.298585  |
| C | -24.181314 | 8.770895  | 3.386408  |
| C | -25.979566 | 9.933310  | 5.095228  |
| C | -23.778036 | 9.852103  | 4.159240  |
| C | -24.690511 | 10.441033 | 5.027471  |
| C | -24.796280 | 5.766139  | 3.275657  |
| C | -25.075039 | 5.434942  | 4.607372  |
| C | -23.587587 | 5.249595  | 2.800900  |



|    |            |           |           |
|----|------------|-----------|-----------|
| C  | -24.259730 | 4.639657  | 5.404889  |
| C  | -22.740704 | 4.439343  | 3.562327  |
| C  | -23.078253 | 4.131722  | 4.872744  |
| F  | -25.759792 | 4.721197  | 0.591960  |
| F  | -25.292242 | 4.827292  | -2.021534 |
| F  | -24.764705 | 7.215466  | -3.233540 |
| F  | -24.692241 | 9.481161  | -1.732981 |
| F  | -25.128195 | 9.410322  | 0.858646  |
| F  | -23.251019 | 8.242627  | 2.583377  |
| F  | -22.536501 | 10.319331 | 4.083156  |
| F  | -24.331927 | 11.471435 | 5.781176  |
| F  | -26.860671 | 10.477297 | 5.928333  |
| F  | -27.592844 | 8.414078  | 4.464200  |
| F  | -27.859044 | 8.600034  | 1.572902  |
| F  | -30.453225 | 8.106602  | 1.330269  |
| F  | -31.485252 | 5.707577  | 2.106967  |
| F  | -29.809166 | 3.810779  | 3.133967  |
| F  | -27.230358 | 4.222354  | 3.287887  |
| F  | -26.183300 | 5.900558  | 5.183500  |
| F  | -24.594860 | 4.371440  | 6.656415  |
| F  | -22.280628 | 3.372310  | 5.604203  |
| F  | -21.616512 | 3.968288  | 3.045338  |
| F  | -23.169606 | 5.493553  | 1.557761  |
| Na | -25.491581 | 3.270274  | 2.251607  |

**[Bn-PPh<sub>3</sub>]<sup>+</sup>**

48

|   |            |           |          |
|---|------------|-----------|----------|
| C | -23.702387 | -8.628455 | 4.450823 |
| C | -24.400981 | -7.430857 | 4.595753 |
| C | -23.713045 | -6.232970 | 4.824634 |
| C | -22.314969 | -6.253440 | 4.893781 |
| C | -21.616433 | -7.450350 | 4.745073 |
| C | -22.309133 | -8.641613 | 4.528769 |
| H | -24.250384 | -9.556432 | 4.272496 |
| H | -25.491900 | -7.427072 | 4.533537 |
| H | -21.770523 | -5.322495 | 5.072588 |
| H | -20.525539 | -7.451752 | 4.800670 |
| H | -21.763101 | -9.580809 | 4.414535 |
| C | -24.457353 | -4.938664 | 5.035218 |
| H | -25.329678 | -4.843049 | 4.370615 |
| H | -23.798577 | -4.077925 | 4.849511 |
| P | -25.079436 | -4.731641 | 6.741836 |
| C | -26.364199 | -5.953406 | 7.083253 |
| C | -27.406552 | -6.090488 | 6.153806 |
| C | -26.375516 | -6.698165 | 8.267591 |
| C | -28.440046 | -6.987304 | 6.402544 |
| H | -27.418983 | -5.497311 | 5.236075 |
| C | -27.416673 | -7.594160 | 8.508193 |
| H | -25.582320 | -6.583981 | 9.008432 |
| C | -28.443025 | -7.741955 | 7.577461 |
| H | -29.248504 | -7.095844 | 5.676894 |
| H | -27.422621 | -8.177015 | 9.431245 |
| H | -29.255356 | -8.446287 | 7.769481 |
| C | -25.808283 | -3.089013 | 6.914033 |
| C | -25.382791 | -2.016075 | 6.120132 |
| C | -26.779881 | -2.891298 | 7.905302 |
| C | -25.935400 | -0.752231 | 6.316905 |
| H | -24.622525 | -2.150954 | 5.348519 |
| C | -27.322309 | -1.623759 | 8.096852 |

|   |            |           |           |
|---|------------|-----------|-----------|
| H | -27.116978 | -3.724907 | 8.526242  |
| C | -26.901680 | -0.555979 | 7.303060  |
| H | -25.606798 | 0.082667  | 5.694874  |
| H | -28.079806 | -1.471135 | 8.868069  |
| H | -27.331865 | 0.436658  | 7.453169  |
| C | -23.708223 | -4.904747 | 7.899716  |
| C | -23.094920 | -6.155955 | 8.072191  |
| C | -23.220848 | -3.782019 | 8.580410  |
| C | -21.999832 | -6.274843 | 8.922381  |
| H | -23.470643 | -7.038243 | 7.550065  |
| C | -22.122865 | -3.912481 | 9.428582  |
| H | -23.693716 | -2.805892 | 8.454341  |
| C | -21.513347 | -5.154854 | 9.598344  |
| H | -21.524881 | -7.248655 | 9.056307  |
| H | -21.745053 | -3.036807 | 9.959966  |
| H | -20.653906 | -5.252655 | 10.265255 |

## References

1. L. Omann, M. Oestreich, *Organometallics*, **2017**, *36*, 767
2. A. M. Ajlouni, A. K. Hijazi, Z. A. Taha, W. Al-Momani, A. Okour, F. E. Kühn, *Catal. Lett.*, **2019**, *149*, 2317
3. Gaussian 16, Revision A.03, M. J. Frisch, G. W. Trucks, H. B. Schlegel, G. E. Scuseria, M. A. Robb, J. R. Cheeseman, G. Scalmani, V. Barone, G. A. Petersson, H. Nakatsuji, X. Li, M. Caricato, A. V. Marenich, J. Bloino, B. G. Janesko, R. Gomperts, B. Mennucci, H. P. Hratchian, J. V. Ortiz, A. F. Izmaylov, J. L. Sonnenberg, D. Williams-Young, F. Ding, F. Lipparini, F. Egidi, J. Goings, B. Peng, A. Petrone, T. Henderson, D. Ranasinghe, V. G. Zakrzewski, J. Gao, N. Rega, G. Zheng, W. Liang, M. Hada, M. Ehara, K. Toyota, R. Fukuda, J. Hasegawa, M. Ishida, T. Nakajima, Y. Honda, O. Kitao, H. Nakai, T. Vreven, K. Throssell, J. A. Montgomery, Jr., J. E. Peralta, F. Ogliaro, M. J. Bearpark, J. J. Heyd, E. N. Brothers, K. N. Kudin, V. N. Staroverov, T. A. Keith, R. Kobayashi, J. Normand, K. Raghavachari, A. P. Rendell, J. C. Burant, S. S. Iyengar, J. Tomasi, M. Cossi, J. M. Millam, M. Klene, C. Adamo, R. Cammi, J. W. Ochterski, R. L. Martin, K. Morokuma, O. Farkas, J. B. Foresman, and D. J. Fox, Gaussian, Inc., Wallingford CT, 2016.
4. (a) J.-D. Chai, M. Head-Gordon, *Phys. Chem. Chem. Phys.* **2008**, *10*, 6615-6620. (b) J.-D. Chai, M. Head-Gordon, *J. Chem. Phys.* **2008**, *128*, 084106.
5. A. V. Marenich, C. J. Cramer, D. G. Truhlar, *J. Phys. Chem. B* **2009**, *113*, 6378-6396.
6. F. Weigend, R. Ahlrichs, *Phys. Chem. Chem. Phys.*, **2005**, *7*, 3297-3305.
7. MacroModel; Schrödinger, LLC: New York, NY, 2017.
